# Supplementary material
Source: MDPI journal article supplement (https://www.mdpi.com/2075-163X/10/3/279)
Supplement: s1 [file s1]

# Provenance and Tectonic Implications of Sedimentary Rocks of the Paleozoic Chiron Basin, Eastern Transbaikalia, Russia, Based on Whole-Rock Geochemistry and Detrital Zircon U–Pb Age and Hf Isotopic Data

Ludmila I. Popeko <sup>1</sup>, Yulia N. Smirnova <sup>2</sup>, Victor A. Zaika <sup>2</sup>, Andrey A. Sorokin <sup>2,\*</sup> and Sergey I. Dril <sup>3</sup>

<sup>1</sup> Kosygin Institute of Tectonics and Geophysics, Far Eastern Branch, Russian Academy of Sciences, Khabarovsk 680000, Russia; popeko@itig.as.khb.ru

<sup>2</sup> Institute of Geology and Nature Management, Far Eastern Branch, Russian Academy of Sciences, Blagoveshchensk 675000, Russia; smirnova@ascnet.ru (Y.N.S.); zaika\_v\_a\_88@mail.ru (V.A.Z.)

<sup>3</sup> Vinogradov Institute of Geochemistry, Siberian Branch, Russian Academy of Sciences, Irkutsk 664033, Russia; sdril@igc.irk.ru

\* Correspondence: sorokin@ascnet.ru

**Table S1.** Chemical composition of the sedimentary rocks of the Chiron Basin.

| Sample                           | Khara-Shibir Formation |        |        |        |        |        |       |        |        |
|----------------------------------|------------------------|--------|--------|--------|--------|--------|-------|--------|--------|
|                                  | Sandstone              |        |        |        |        |        |       |        |        |
|                                  | Y-92                   | Y-92-2 | Y-92-3 | Y-92-5 | Y-92-6 | Y-92-7 | Y-98  | Y-98-1 | Y-98-2 |
| Major elements (wt.%)            |                        |        |        |        |        |        |       |        |        |
| SiO <sub>2</sub>                 | 73.30                  | 75.09  | 73.96  | 73.53  | 67.31  | 72.89  | 74.46 | 73.15  | 72.86  |
| TiO <sub>2</sub>                 | 0.39                   | 0.44   | 0.39   | 0.34   | 0.45   | 0.41   | 0.29  | 0.21   | 0.24   |
| Al <sub>2</sub> O <sub>3</sub>   | 12.71                  | 11.85  | 12.35  | 12.32  | 13.71  | 12.57  | 12.09 | 13.01  | 12.81  |
| Fe <sub>2</sub> O <sub>3</sub> * | 2.33                   | 1.39   | 1.69   | 1.30   | 3.26   | 2.50   | 1.53  | 1.65   | 1.50   |
| MnO                              | 0.03                   | 0.02   | 0.03   | 0.06   | 0.05   | 0.05   | 0.03  | 0.04   | 0.04   |
| MgO                              | 0.75                   | 0.55   | 0.65   | 0.63   | 1.24   | 0.82   | 0.67  | 0.63   | 0.79   |
| CaO                              | 1.03                   | 0.89   | 0.90   | 0.80   | 0.95   | 0.97   | 0.84  | 0.85   | 0.87   |
| Na <sub>2</sub> O                | 4.38                   | 5.60   | 5.36   | 6.15   | 6.43   | 5.01   | 6.39  | 5.73   | 6.70   |
| K <sub>2</sub> O                 | 3.18                   | 2.94   | 3.29   | 3.39   | 3.49   | 3.04   | 2.73  | 3.27   | 2.97   |
| P <sub>2</sub> O <sub>5</sub>    | 0.11                   | 0.08   | 0.10   | 0.09   | 0.13   | 0.09   | 0.05  | 0.06   | 0.05   |
| LOI                              | 1.19                   | 0.84   | 0.87   | 1.01   | 2.70   | 1.15   | 0.62  | 0.81   | 0.88   |
| Total                            | 99.40                  | 99.69  | 99.59  | 99.62  | 99.72  | 99.50  | 99.70 | 99.41  | 99.71  |
| CIA                              | 50                     | 46     | 47     | 45     | 46     | 49     | 45    | 47     | 45     |
| CIW                              | 58                     | 52     | 54     | 52     | 53     | 56     | 50    | 54     | 50     |
| WIP                              | 72                     | 80     | 81     | 89     | 95     | 77     | 86    | 84     | 91     |
| STI                              | 88                     | 88     | 88     | 88     | 86     | 88     | 89    | 89     | 89     |
| Rare Earth Element (ppm)         |                        |        |        |        |        |        |       |        |        |
| La                               | 12.09                  | 21.71  | 25.55  | 22.98  | 20.74  | 19.89  | 19.10 | 12.42  | 10.48  |
| Ce                               | 37.79                  | 47.27  | 67.26  | 47.15  | 51.52  | 58.61  | 40.95 | 24.88  | 20.67  |
| Pr                               | 3.02                   | 4.74   | 5.23   | 4.54   | 4.52   | 4.32   | 4.11  | 2.66   | 2.26   |
| Nd                               | 11.18                  | 16.81  | 18.78  | 16.54  | 15.97  | 15.84  | 15.02 | 9.80   | 8.27   |
| Sm                               | 1.94                   | 2.94   | 3.15   | 2.78   | 2.74   | 2.71   | 2.49  | 1.72   | 1.50   |
| Eu                               | 0.43                   | 0.57   | 0.60   | 0.53   | 0.53   | 0.54   | 0.54  | 0.50   | 0.43   |
| Gd                               | 1.59                   | 2.35   | 2.56   | 2.30   | 2.28   | 2.34   | 2.10  | 1.54   | 1.31   |
| Tb                               | 0.26                   | 0.33   | 0.37   | 0.34   | 0.35   | 0.36   | 0.29  | 0.22   | 0.18   |
| Dy                               | 1.64                   | 1.81   | 2.04   | 1.95   | 2.09   | 2.10   | 1.61  | 1.26   | 1.03   |
| Ho                               | 0.32                   | 0.31   | 0.35   | 0.34   | 0.38   | 0.38   | 0.28  | 0.23   | 0.19   |
| Er                               | 1.09                   | 1.00   | 1.08   | 1.05   | 1.28   | 1.24   | 0.89  | 0.72   | 0.58   |
| Tm                               | 0.17                   | 0.14   | 0.15   | 0.14   | 0.18   | 0.18   | 0.12  | 0.10   | 0.08   |
| Yb                               | 1.27                   | 1.04   | 1.07   | 1.02   | 1.38   | 1.31   | 0.88  | 0.72   | 0.61   |
| Lu                               | 0.19                   | 0.15   | 0.15   | 0.14   | 0.21   | 0.19   | 0.13  | 0.10   | 0.09   |

|                                  |                        |        |        |        |        |        |        |       |       |
|----------------------------------|------------------------|--------|--------|--------|--------|--------|--------|-------|-------|
| [La/Yb]n                         | 6.48                   | 14.15  | 16.19  | 15.37  | 10.19  | 10.31  | 14.81  | 11.74 | 11.71 |
| Eu/Eu*                           | 0.73                   | 0.64   | 0.62   | 0.62   | 0.63   | 0.64   | 0.70   | 0.91  | 0.92  |
| ΣREE                             | 73                     | 101    | 128    | 102    | 104    | 110    | 88     | 57    | 48    |
| Trace Element (ppm)              |                        |        |        |        |        |        |        |       |       |
| Li                               | 16.74                  | 5.90   | 7.19   | 7.25   | 29.02  | 15.63  | 7.65   | 8.33  | 8.88  |
| Rb                               | 119                    | 83     | 94     | 99     | 114    | 99     | 89     | 113   | 81    |
| Sr                               | 241                    | 158    | 158    | 176    | 231    | 224    | 190    | 208   | 249   |
| Ba                               | 797                    | 621    | 586    | 541    | 702    | 693    | 658    | 779   | 817   |
| Y                                | 27.00                  | 24.00  | 25.00  | 26.00  | 26.00  | 26.00  | 24.00  | 25.00 | 23.00 |
| Th                               | 9.38                   | 11.02  | 8.28   | 6.43   | 10.74  | 8.49   | 5.94   | 4.68  | 4.88  |
| U                                | 1.22                   | 1.05   | 0.92   | 0.76   | 1.70   | 1.13   | 0.77   | 0.65  | 0.82  |
| Zr                               | 227                    | 254    | 233    | 157    | 297    | 237    | 106    | 84    | 103   |
| Hf                               | 1.92                   | 1.81   | 1.54   | 1.07   | 2.25   | 1.87   | 0.90   | 0.82  | 0.85  |
| Nb                               | 11.00                  | 12.00  | 13.00  | 11.00  | 11.00  | 13.00  | 9.00   | 9.00  | 9.00  |
| Ta                               | 0.63                   | 0.99   | 0.73   | 0.52   | 0.79   | 0.82   | 0.46   | 0.41  | 0.39  |
| Zn                               | 70.30                  | 47.14  | 51.39  | 50.04  | 73.75  | 53.32  | 40.06  | 56.95 | 51.97 |
| Co                               | 7.00                   | 6.00   | 6.00   | 6.00   | 11.00  | 8.00   | 6.00   | 5.00  | 6.00  |
| Ni                               | 19.00                  | 23.00  | 17.00  | 22.00  | 18.00  | 19.00  | 22.00  | 25.00 | 18.00 |
| Sc                               | 4.14                   | 2.62   | 2.73   | 1.56   | 4.71   | 3.77   | 2.06   | 1.86  | 2.03  |
| V                                | 33.00                  | 26.00  | 35.00  | 28.00  | 34.00  | 34.00  | 16.00  | 19.00 | 16.00 |
| Cr                               | 76.00                  | 97.00  | 74.00  | 88.00  | 58.00  | 64.00  | 100.00 | 84.00 | 94.00 |
| Pb                               | 12.98                  | 8.19   | 9.57   | 8.46   | 13.48  | 11.81  | 10.94  | 13.21 | 12.88 |
|                                  |                        |        |        |        |        |        |        |       |       |
| Sample                           | Khara-Shibir Formation |        |        |        |        |        |        |       |       |
|                                  | Sandstone              |        |        |        |        |        |        |       |       |
|                                  | Y-98-3                 | Y-98-4 | Y-98-5 | Y-98-6 | Y-98-7 | Y-98-8 | Y-98-9 |       |       |
| Major elements (wt.%)            |                        |        |        |        |        |        |        |       |       |
| SiO <sub>2</sub>                 | 71.77                  | 73.09  | 73.57  | 73.50  | 74.70  | 73.47  | 73.17  |       |       |
| TiO <sub>2</sub>                 | 0.22                   | 0.29   | 0.21   | 0.22   | 0.28   | 0.21   | 0.22   |       |       |
| Al <sub>2</sub> O <sub>3</sub>   | 13.38                  | 12.70  | 12.68  | 13.39  | 12.68  | 12.99  | 13.66  |       |       |
| Fe <sub>2</sub> O <sub>3</sub> * | 1.21                   | 1.74   | 1.56   | 1.60   | 1.76   | 1.39   | 1.19   |       |       |
| MnO                              | 0.02                   | 0.04   | 0.03   | 0.03   | 0.05   | 0.02   | 0.02   |       |       |
| MgO                              | 0.57                   | 0.73   | 0.57   | 0.59   | 0.49   | 0.56   | 0.49   |       |       |
| CaO                              | 0.76                   | 0.87   | 0.85   | 0.93   | 0.99   | 0.87   | 0.89   |       |       |
| Na <sub>2</sub> O                | 6.96                   | 5.95   | 5.82   | 4.61   | 4.46   | 5.64   | 5.30   |       |       |
| K <sub>2</sub> O                 | 3.48                   | 2.97   | 3.15   | 3.44   | 2.89   | 3.23   | 3.34   |       |       |
| P <sub>2</sub> O <sub>5</sub>    | 0.06                   | 0.06   | 0.06   | 0.06   | 0.06   | 0.05   | 0.05   |       |       |
| LOI                              | 1.02                   | 1.10   | 0.90   | 1.13   | 1.08   | 0.87   | 0.93   |       |       |
| Total                            | 99.45                  | 99.54  | 99.40  | 99.50  | 99.44  | 99.30  | 99.26  |       |       |
| CIA                              | 45                     | 46     | 47     | 51     | 51     | 48     | 50     |       |       |
| CIW                              | 51                     | 53     | 53     | 59     | 58     | 54     | 57     |       |       |
| WIP                              | 97                     | 84     | 84     | 76     | 70     | 83     | 81     |       |       |
| STI                              | 88                     | 88     | 89     | 89     | 89     | 89     | 88     |       |       |
| Rare earth element (ppm)         |                        |        |        |        |        |        |        |       |       |
| La                               | 9.50                   | 16.09  | 13.37  | 15.89  | 10.57  | 10.12  | 11.09  |       |       |
| Ce                               | 17.55                  | 52.23  | 29.04  | 30.02  | 41.82  | 17.98  | 23.36  |       |       |
| Pr                               | 2.02                   | 3.67   | 2.78   | 3.28   | 2.62   | 2.28   | 2.38   |       |       |
| Nd                               | 7.44                   | 13.00  | 10.30  | 11.86  | 9.40   | 8.32   | 8.84   |       |       |
| Sm                               | 1.30                   | 2.22   | 1.80   | 2.06   | 1.68   | 1.47   | 1.54   |       |       |
| Eu                               | 0.38                   | 0.49   | 0.50   | 0.53   | 0.37   | 0.43   | 0.44   |       |       |
| Gd                               | 1.13                   | 1.82   | 1.58   | 1.86   | 1.30   | 1.25   | 1.32   |       |       |
| Tb                               | 0.16                   | 0.28   | 0.23   | 0.26   | 0.20   | 0.18   | 0.18   |       |       |
| Dy                               | 0.91                   | 1.58   | 1.34   | 1.46   | 1.19   | 1.02   | 1.05   |       |       |
| Ho                               | 0.17                   | 0.29   | 0.24   | 0.26   | 0.22   | 0.19   | 0.20   |       |       |
| Er                               | 0.53                   | 0.90   | 0.76   | 0.82   | 0.70   | 0.59   | 0.63   |       |       |
| Tm                               | 0.08                   | 0.13   | 0.11   | 0.11   | 0.10   | 0.08   | 0.09   |       |       |
| Yb                               | 0.54                   | 0.91   | 0.75   | 0.76   | 0.72   | 0.58   | 0.65   |       |       |
| Lu                               | 0.08                   | 0.13   | 0.11   | 0.11   | 0.10   | 0.08   | 0.10   |       |       |
| [La/Yb]n                         | 11.96                  | 11.97  | 12.14  | 14.16  | 9.91   | 11.86  | 11.54  |       |       |
| Eu/Eu*                           | 0.94                   | 0.72   | 0.88   | 0.81   | 0.74   | 0.94   | 0.92   |       |       |
| ΣREE                             | 42                     | 94     | 63     | 69     | 71     | 45     | 52     |       |       |
| Trace element (ppm)              |                        |        |        |        |        |        |        |       |       |
| Li                               | 7.20                   | 9.34   | 6.78   | 6.87   | 6.07   | 6.77   | 5.40   |       |       |
| Rb                               | 103                    | 100    | 111    | 120    | 107    | 118    | 122    |       |       |
| Sr                               | 215                    | 207    | 208    | 172    | 222    | 202    | 203    |       |       |

|    |       |       |       |       |       |       |       |
|----|-------|-------|-------|-------|-------|-------|-------|
| Ba | 811   | 697   | 711   | 753   | 626   | 721   | 775   |
| Yb | 0.54  | 0.91  | 0.75  | 0.76  | 0.72  | 0.58  | 0.65  |
| Y  | 22.00 | 25.00 | 24.00 | 24.00 | 24.00 | 26.00 | 23.00 |
| Th | 4.41  | 7.81  | 4.96  | 4.84  | 5.74  | 4.71  | 4.65  |
| U  | 0.59  | 0.80  | 0.65  | 0.36  | 0.66  | 0.71  | 0.69  |
| Zr | 85    | 117   | 91    | 81    | 116   | 87    | 86    |
| Hf | 0.84  | 0.99  | 0.82  | 0.81  | 0.77  | 0.80  | 0.84  |
| Nb | 7.00  | 9.00  | 8.00  | 8.00  | 8.00  | 8.00  | 8.00  |
| Ta | 0.36  | 0.89  | 0.34  | 0.37  | 0.35  | 0.31  | 0.31  |
| Zn | 44.26 | 72.30 | 41.11 | 44.48 | 45.37 | 41.10 | 43.27 |
| Co | 5.00  | 6.00  | 6.00  | 6.00  | 6.00  | 5.00  | 5.00  |
| Ni | 24.00 | 24.00 | 20.00 | 19.00 | 22.00 | 23.00 | 21.00 |
| Sc | 1.64  | 2.26  | 1.76  | 1.84  | 1.62  | 1.61  | 1.65  |
| V  | 17.00 | 26.00 | 23.00 | 21.00 | 20.00 | 18.00 | 25.00 |
| Cr | 78.00 | 89.00 | 89.00 | 62.00 | 80.00 | 73.00 | 64.00 |
| Pb | 11.86 | 12.30 | 12.17 | 11.90 | 10.59 | 12.15 | 12.89 |

| Sample                           | Shazagaitui Formation |       |        |         |                 |        |        |        |        |        |           |        |        |
|----------------------------------|-----------------------|-------|--------|---------|-----------------|--------|--------|--------|--------|--------|-----------|--------|--------|
|                                  | Sandstone             |       |        |         | Silty sandstone |        |        |        |        |        | Siltstone |        |        |
|                                  | Y-96-3                | Y-97  | Y-97-7 | Y-97-11 | Y-96            | Y-96-1 | Y-96-4 | Y-96-5 | Y-97-1 | Y-97-2 | Y-97-3    | Y-97-4 | Y-96-2 |
| Major Elements (wt.%)            |                       |       |        |         |                 |        |        |        |        |        |           |        |        |
| SiO <sub>2</sub>                 | 66.25                 | 70.21 | 71.27  | 71.03   | 68.30           | 69.39  | 66.70  | 62.56  | 63.00  | 65.45  | 60.43     | 65.35  | 59.48  |
| TiO <sub>2</sub>                 | 0.54                  | 0.44  | 0.47   | 0.48    | 0.54            | 0.39   | 0.53   | 0.40   | 0.59   | 0.61   | 0.47      | 0.67   | 0.40   |
| Al <sub>2</sub> O <sub>3</sub>   | 12.80                 | 13.98 | 13.24  | 13.37   | 12.92           | 10.87  | 13.19  | 10.98  | 13.08  | 14.07  | 12.26     | 13.99  | 11.03  |
| Fe <sub>2</sub> O <sub>3</sub> * | 4.58                  | 3.14  | 2.82   | 3.32    | 4.37            | 3.39   | 3.57   | 4.12   | 6.51   | 5.34   | 3.04      | 4.70   | 2.29   |
| MnO                              | 0.10                  | 0.03  | 0.04   | 0.03    | 0.06            | 0.06   | 0.11   | 0.22   | 0.11   | 0.06   | 0.19      | 0.06   | 0.21   |
| MgO                              | 1.51                  | 1.03  | 0.97   | 0.93    | 1.18            | 1.03   | 1.28   | 1.11   | 1.37   | 1.57   | 1.01      | 1.87   | 1.08   |
| CaO                              | 3.57                  | 0.96  | 0.95   | 1.01    | 2.78            | 4.83   | 3.16   | 8.00   | 4.28   | 2.52   | 8.54      | 2.18   | 10.85  |
| Na <sub>2</sub> O                | 3.00                  | 4.66  | 5.10   | 4.43    | 2.99            | 1.68   | 3.82   | 2.91   | 2.28   | 2.86   | 3.86      | 4.38   | 3.95   |
| K <sub>2</sub> O                 | 2.60                  | 3.11  | 3.14   | 3.25    | 2.56            | 2.47   | 2.59   | 2.11   | 2.94   | 3.15   | 2.00      | 2.86   | 1.85   |
| P <sub>2</sub> O <sub>5</sub>    | 0.15                  | 0.13  | 0.14   | 0.15    | 0.15            | 0.10   | 0.16   | 0.13   | 0.16   | 0.16   | 0.14      | 0.22   | 0.16   |
| LOI                              | 4.28                  | 1.90  | 1.40   | 1.52    | 3.36            | 4.82   | 4.14   | 6.85   | 4.70   | 3.53   | 7.27      | 3.03   | 7.91   |
| Total                            | 99.38                 | 99.59 | 99.54  | 99.52   | 99.21           | 99.03  | 99.25  | 99.39  | 99.02  | 99.32  | 99.21     | 99.31  | 99.21  |
| CIA                              | 47                    | 52    | 50     | 51      | 50              | 43     | 47     | 34     | 47     | 53     | 34        | 50     | 28     |
| CIW                              | 53                    | 60    | 57     | 59      | 56              | 48     | 52     | 36     | 53     | 60     | 36        | 56     | 30     |
| WIP                              | 63                    | 75    | 79     | 74      | 60              | 52     | 69     | 68     | 61     | 64     | 77        | 75     | 83     |
| STI                              | 86                    | 86    | 87     | 86      | 86              | 88     | 86     | 87     | 85     | 85     | 86        | 84     | 86     |
| Rare Earth Element (ppm)         |                       |       |        |         |                 |        |        |        |        |        |           |        |        |
| La                               | 35.31                 | 29.53 | 27.31  | 36.50   | 35.83           | 25.24  | 40.95  | 30.68  | 41.60  | 42.92  | 32.10     | 50.10  | 30.36  |
| Ce                               | 70.26                 | 62.36 | 57.12  | 74.39   | 69.87           | 49.30  | 73.01  | 62.18  | 86.07  | 88.48  | 60.07     | 101.70 | 57.22  |
| Pr                               | 7.47                  | 6.51  | 6.59   | 7.69    | 7.36            | 5.03   | 8.35   | 6.55   | 9.07   | 9.51   | 6.83      | 10.73  | 6.13   |
| Nd                               | 28.64                 | 24.16 | 24.81  | 28.22   | 27.74           | 18.77  | 31.92  | 25.13  | 35.87  | 37.14  | 26.28     | 41.23  | 23.24  |
| Sm                               | 5.01                  | 3.95  | 4.23   | 4.64    | 4.84            | 3.22   | 5.66   | 4.31   | 6.48   | 6.68   | 4.58      | 7.06   | 4.04   |
| Eu                               | 1.08                  | 0.75  | 0.80   | 0.85    | 1.04            | 0.71   | 1.24   | 0.96   | 1.24   | 1.32   | 1.11      | 1.29   | 0.89   |
| Gd                               | 4.36                  | 3.02  | 3.48   | 3.66    | 4.27            | 2.70   | 5.08   | 3.78   | 5.65   | 6.07   | 4.20      | 5.94   | 3.60   |
| Tb                               | 0.60                  | 0.40  | 0.46   | 0.48    | 0.60            | 0.39   | 0.70   | 0.54   | 0.82   | 0.86   | 0.62      | 0.82   | 0.49   |
| Dy                               | 3.23                  | 2.10  | 2.43   | 2.54    | 3.38            | 2.18   | 3.98   | 3.06   | 4.79   | 5.10   | 3.78      | 4.50   | 2.74   |
| Ho                               | 0.58                  | 0.37  | 0.42   | 0.46    | 0.62            | 0.40   | 0.73   | 0.56   | 0.88   | 0.94   | 0.73      | 0.79   | 0.50   |
| Er                               | 1.79                  | 1.19  | 1.30   | 1.44    | 1.88            | 1.27   | 2.23   | 1.76   | 2.80   | 2.99   | 2.35      | 2.45   | 1.58   |
| Tm                               | 0.23                  | 0.16  | 0.17   | 0.19    | 0.25            | 0.17   | 0.28   | 0.23   | 0.36   | 0.39   | 0.31      | 0.31   | 0.20   |
| Yb                               | 1.57                  | 1.12  | 1.19   | 1.36    | 1.72            | 1.20   | 1.87   | 1.60   | 2.57   | 2.70   | 2.21      | 2.09   | 1.37   |
| Lu                               | 0.22                  | 0.16  | 0.17   | 0.20    | 0.25            | 0.17   | 0.26   | 0.22   | 0.36   | 0.37   | 0.31      | 0.29   | 0.19   |
| [La/Yb] <sub>n</sub>             | 15.24                 | 17.90 | 15.60  | 18.26   | 14.10           | 14.29  | 14.89  | 13.04  | 10.99  | 10.93  | 9.87      | 16.31  | 15.09  |
| Eu/Eu*                           | 0.69                  | 0.64  | 0.62   | 0.61    | 0.68            | 0.72   | 0.69   | 0.71   | 0.61   | 0.62   | 0.76      | 0.59   | 0.70   |
| ΣREE                             | 160                   | 136   | 130    | 163     | 160             | 111    | 176    | 142    | 199    | 205    | 146       | 229    | 133    |
| Trace Element (ppm)              |                       |       |        |         |                 |        |        |        |        |        |           |        |        |
| Li                               | 22.20                 | 14.28 | 11.78  | 13.72   | 19.30           | 21.07  | 20.33  | 24.87  | 33.57  | 33.84  | 20.70     | 30.89  | 15.03  |
| Rb                               | 97                    | 94    | 99     | 101     | 107             | 124    | 104    | 73     | 120    | 125    | 79        | 108    | 61     |
| Sr                               | 469                   | 152   | 173    | 177     | 519             | 469    | 539    | 554    | 359    | 293    | 572       | 277    | 867    |
| Ba                               | 906                   | 791   | 738    | 821     | 913             | 779    | 881    | 691    | 844    | 872    | 571       | 848    | 748    |
| Y                                | 29.00                 | 24.00 | 26.00  | 28.00   | 34.00           | 29.00  | 35.00  | 26.00  | 37.00  | 38.00  | 28.00     | 33.00  | 23.00  |
| Th                               | 8.73                  | 10.73 | 9.69   | 12.37   | 10.59           | 8.40   | 8.89   | 8.58   | 15.08  | 14.05  | 10.70     | 18.67  | 6.70   |
| U                                | 1.55                  | 1.44  | 1.25   | 1.30    | 2.11            | 1.76   | 1.64   | 3.18   | 2.50   | 2.32   | 1.41      | 2.12   | 1.55   |
| Zr                               | 210                   | 209   | 227    | 235     | 212             | 166    | 215    | 229    | 198    | 225    | 212       | 194    | 242    |
| Hf                               | 1.91                  | 1.86  | 1.99   | 2.10    | 2.28            | 1.96   | 2.01   | 2.17   | 2.77   | 3.02   | 2.22      | 2.24   | 1.75   |

|    |        |       |       |       |       |       |       |       |        |        |       |        |       |
|----|--------|-------|-------|-------|-------|-------|-------|-------|--------|--------|-------|--------|-------|
| Nb | 12.00  | 12.00 | 11.00 | 10.00 | 11.00 | 10.00 | 10.00 | 10.00 | 14.00  | 14.00  | 12.00 | 13.00  | 9.00  |
| Ta | 0.61   | 0.34  | 0.45  | 0.55  | 0.77  | 0.54  | 0.65  | 0.71  | 1.08   | 1.08   | 1.54  | 0.84   | 0.54  |
| Zn | 104.22 | 70.41 | 51.31 | 69.69 | 99.23 | 72.26 | 95.87 | 95.59 | 124.87 | 126.37 | 71.30 | 105.14 | 87.93 |
| Co | 11.00  | 10.00 | 9.00  | 9.00  | 9.00  | 9.00  | 10.00 | 10.00 | 13.00  | 13.00  | 9.00  | 13.00  | 8.00  |
| Ni | 23.00  | 26.00 | 23.00 | 22.00 | 27.00 | 16.00 | 26.00 | 20.00 | 25.00  | 27.00  | 24.00 | 27.00  | 17.00 |
| Sc | 6.54   | 4.73  | 4.57  | 5.65  | 6.39  | 4.71  | 5.92  | 5.20  | 10.22  | 9.94   | 8.39  | 10.12  | 4.11  |
| V  | 56.00  | 58.00 | 45.00 | 53.00 | 60.00 | 32.00 | 46.00 | 47.00 | 81.00  | 87.00  | 61.00 | 84.00  | 26.00 |
| Cr | 43.00  | 67.00 | 78.00 | 66.00 | 40.00 | 33.00 | 42.00 | 45.00 | 49.00  | 45.00  | 44.00 | 52.00  | 33.00 |
| Pb | 13.72  | 10.92 | 12.73 | 14.11 | 18.29 | 16.36 | 17.16 | 13.18 | 23.46  | 22.95  | 16.98 | 24.92  | 13.26 |

| Sample                           | Zhipkhoshi Formation |       |        |        |        |        |       |        |        |  |
|----------------------------------|----------------------|-------|--------|--------|--------|--------|-------|--------|--------|--|
|                                  | Sandstone            |       |        |        |        |        |       |        |        |  |
|                                  | Y-93                 | Y-94  | Y-94-1 | Y-94-5 | Y-94-7 | Y-94-8 | Y-95  | Y-95-1 | Y-95-2 |  |
| Major elements (wt.%)            |                      |       |        |        |        |        |       |        |        |  |
| SiO <sub>2</sub>                 | 77.22                | 55.81 | 71.12  | 69.87  | 69.12  | 68.44  | 78.00 | 77.87  | 77.81  |  |
| TiO <sub>2</sub>                 | 0.34                 | 0.38  | 0.54   | 0.50   | 0.49   | 0.50   | 0.30  | 0.27   | 0.27   |  |
| Al <sub>2</sub> O <sub>3</sub>   | 11.29                | 10.10 | 13.03  | 13.39  | 13.29  | 11.94  | 10.53 | 11.04  | 10.55  |  |
| Fe <sub>2</sub> O <sub>3</sub> * | 1.62                 | 1.47  | 2.72   | 2.86   | 3.32   | 2.56   | 1.05  | 1.18   | 1.03   |  |
| MnO                              | 0.03                 | 0.52  | 0.07   | 0.04   | 0.04   | 0.07   | 0.01  | 0.03   | 0.03   |  |
| MgO                              | 0.53                 | 0.83  | 1.02   | 1.28   | 1.41   | 1.01   | 0.54  | 0.55   | 0.46   |  |
| CaO                              | 0.91                 | 14.71 | 1.07   | 1.70   | 1.88   | 4.48   | 0.82  | 0.92   | 0.85   |  |
| Na <sub>2</sub> O                | 4.14                 | 3.73  | 5.82   | 5.08   | 5.04   | 5.15   | 6.85  | 5.82   | 7.16   |  |
| K <sub>2</sub> O                 | 2.48                 | 1.73  | 1.70   | 2.72   | 2.72   | 1.51   | 0.96  | 1.05   | 0.67   |  |
| P <sub>2</sub> O <sub>5</sub>    | 0.06                 | 0.14  | 0.16   | 0.19   | 0.17   | 0.14   | 0.07  | 0.07   | 0.08   |  |
| LOI                              | 0.98                 | 10.03 | 2.23   | 1.85   | 2.03   | 3.59   | 0.60  | 0.79   | 0.78   |  |
| Total                            | 99.60                | 99.45 | 99.48  | 99.48  | 99.51  | 99.39  | 99.73 | 99.59  | 99.69  |  |
| CIA                              | 50                   | 22    | 49     | 48     | 48     | 40     | 43    | 47     | 43     |  |
| CIW                              | 57                   | 24    | 53     | 54     | 53     | 42     | 45    | 50     | 44     |  |
| WIP                              | 63                   | 89    | 74     | 78     | 78     | 74     | 75    | 66     | 75     |  |
| STI                              | 89                   | 87    | 86     | 86     | 86     | 86     | 90    | 90     | 90     |  |
| Rare earth element (ppm)         |                      |       |        |        |        |        |       |        |        |  |
| La                               | 25.52                | 24.96 | 30.00  | 40.04  | 41.11  | 28.92  | 19.05 | 17.57  | 15.36  |  |
| Ce                               | 52.26                | 52.40 | 57.83  | 84.44  | 83.28  | 59.04  | 42.53 | 39.93  | 34.22  |  |
| Pr                               | 5.34                 | 5.54  | 6.58   | 8.31   | 8.49   | 6.13   | 4.19  | 3.927  | 3.45   |  |
| Nd                               | 19.22                | 21.39 | 25.47  | 31.98  | 32.62  | 23.52  | 15.56 | 14.74  | 12.95  |  |
| Sm                               | 3.14                 | 3.68  | 4.27   | 5.47   | 5.51   | 4.04   | 2.47  | 2.41   | 2.14   |  |
| Eu                               | 0.61                 | 0.90  | 0.94   | 1.24   | 1.21   | 0.98   | 0.58  | 0.58   | 0.52   |  |
| Gd                               | 2.52                 | 3.24  | 3.45   | 4.75   | 4.68   | 3.38   | 1.83  | 1.93   | 1.70   |  |
| Tb                               | 0.35                 | 0.45  | 0.47   | 0.67   | 0.66   | 0.49   | 0.23  | 0.25   | 0.23   |  |
| Dy                               | 1.90                 | 2.54  | 2.61   | 3.81   | 3.69   | 2.68   | 1.15  | 1.34   | 1.20   |  |
| Ho                               | 0.33                 | 0.47  | 0.47   | 0.68   | 0.68   | 0.49   | 0.19  | 0.23   | 0.22   |  |
| Er                               | 1.06                 | 1.46  | 1.56   | 2.09   | 2.13   | 1.54   | 0.62  | 0.72   | 0.70   |  |
| Tm                               | 0.15                 | 0.19  | 0.21   | 0.28   | 0.28   | 0.20   | 0.09  | 0.10   | 0.10   |  |
| Yb                               | 1.04                 | 1.30  | 1.45   | 1.93   | 1.96   | 1.40   | 0.62  | 0.69   | 0.66   |  |
| Lu                               | 0.15                 | 0.19  | 0.21   | 0.28   | 0.28   | 0.20   | 0.09  | 0.10   | 0.10   |  |
| [La/Yb] <sub>n</sub>             | 16.60                | 13.00 | 14.10  | 14.08  | 14.24  | 14.04  | 21.00 | 17.24  | 15.73  |  |
| Eu/Eu*                           | 0.64                 | 0.78  | 0.72   | 0.73   | 0.71   | 0.78   | 0.80  | 0.79   | 0.81   |  |
| ΣREE                             | 114                  | 119   | 136    | 186    | 187    | 133    | 89    | 84     | 74     |  |
| Trace element (ppm)              |                      |       |        |        |        |        |       |        |        |  |
| Li                               | 7.81                 | 12.07 | 15.62  | 16.16  | 19.48  | 15.41  | 6.41  | 9.88   | 10.14  |  |
| Rb                               | 92                   | 52    | 67     | 91     | 85     | 57     | 39    | 46     | 30     |  |
| Sr                               | 204                  | 662   | 335    | 406    | 403    | 545    | 173   | 170    | 151    |  |
| Ba                               | 589                  | 789   | 593    | 1362   | 1379   | 622    | 271   | 318    | 181    |  |
| Y                                | 26.00                | 20.00 | 22.00  | 34.00  | 33.00  | 23.00  | 16.00 | 17.00  | 15.00  |  |
| Th                               | 6.22                 | 6.13  | 7.31   | 9.00   | 8.73   | 6.66   | 3.83  | 3.73   | 3.56   |  |
| U                                | 1.14                 | 1.45  | 1.46   | 1.47   | 1.41   | 1.41   | 0.76  | 0.70   | 0.72   |  |
| Zr                               | 230                  | 230   | 231    | 389    | 341    | 252    | 113   | 106    | 99     |  |
| Hf                               | 1.96                 | 1.88  | 2.19   | 2.58   | 2.56   | 2.00   | 1.05  | 1.00   | 0.99   |  |
| Nb                               | 11.00                | 10.00 | 10.00  | 14.00  | 14.00  | 12.00  | 10.00 | 9.00   | 9.00   |  |
| Ta                               | 0.58                 | 0.62  | 0.60   | 0.75   | 0.76   | 0.51   | 0.32  | 0.28   | 0.33   |  |
| Zn                               | 62.91                | 59.62 | 81.28  | 118.11 | 99.17  | 61.35  | 51.70 | 36.53  | 25.76  |  |
| Co                               | 6.00                 | 6.00  | 8.00   | 9.00   | 10.00  | 8.00   | 5.00  | 5.00   | 5.00   |  |
| Ni                               | 18.00                | 16.00 | 28.00  | 21.00  | 22.00  | 24.00  | 21.00 | 26.00  | 25.00  |  |
| Sc                               | 2.47                 | 4.73  | 5.55   | 5.70   | 6.00   | 4.83   | 1.64  | 2.02   | 1.70   |  |
| V                                | 27.00                | 42.00 | 50.00  | 50.00  | 43.00  | 40.00  | 22.00 | 19.00  | 21.00  |  |

|    |       |       |       |       |       |       |        |       |       |
|----|-------|-------|-------|-------|-------|-------|--------|-------|-------|
| Cr | 83.00 | 44.00 | 65.00 | 57.00 | 58.00 | 59.00 | 108.00 | 89.00 | 86.00 |
| Pb | 10.01 | 12.22 | 15.35 | 14.06 | 14.87 | 12.85 | 7.65   | 9.75  | 8.51  |

  

| Sample                           | Zhipkhoshi Formation |        |        |        |        |        |           |        |        |
|----------------------------------|----------------------|--------|--------|--------|--------|--------|-----------|--------|--------|
|                                  | Sandstone            |        |        |        |        |        | Siltstone |        |        |
|                                  | Y-95-3               | Y-95-5 | Y-95-6 | Y-95-7 | Y-95-8 | Y-95-9 | Y-94-2    | Y-94-4 | Y-94-6 |
| Major Elements (wt.%)            |                      |        |        |        |        |        |           |        |        |
| SiO <sub>2</sub>                 | 77.51                | 77.44  | 79.07  | 78.94  | 77.66  | 72.68  | 69.90     | 66.34  | 65.94  |
| TiO <sub>2</sub>                 | 0.26                 | 0.29   | 0.29   | 0.30   | 0.43   | 0.16   | 0.51      | 0.52   | 0.48   |
| Al <sub>2</sub> O <sub>3</sub>   | 10.36                | 10.99  | 10.26  | 10.23  | 10.85  | 13.78  | 12.22     | 12.76  | 13.11  |
| Fe <sub>2</sub> O <sub>3</sub> * | 1.14                 | 1.21   | 1.01   | 1.08   | 1.43   | 1.61   | 2.61      | 3.49   | 2.50   |
| MnO                              | 0.01                 | 0.03   | 0.02   | 0.01   | 0.02   | 0.03   | 0.08      | 0.07   | 0.07   |
| MgO                              | 0.48                 | 0.44   | 0.51   | 0.47   | 0.52   | 0.49   | 1.01      | 1.44   | 1.30   |
| CaO                              | 0.77                 | 0.83   | 0.86   | 0.83   | 1.04   | 1.03   | 3.11      | 3.95   | 4.37   |
| Na <sub>2</sub> O                | 7.51                 | 6.66   | 6.04   | 6.52   | 4.69   | 5.10   | 5.07      | 2.75   | 5.23   |
| K <sub>2</sub> O                 | 0.60                 | 0.64   | 0.59   | 0.53   | 1.75   | 3.67   | 1.73      | 3.00   | 2.63   |
| P <sub>2</sub> O <sub>5</sub>    | 0.27                 | 0.07   | 0.06   | 0.33   | 0.11   | 0.06   | 0.14      | 0.14   | 0.20   |
| LOI                              | 0.63                 | 0.84   | 0.72   | 0.51   | 0.96   | 0.82   | 3.10      | 4.89   | 3.82   |
| Total                            | 99.54                | 99.44  | 99.43  | 99.75  | 99.46  | 99.43  | 99.48     | 99.35  | 99.65  |
| CIA                              | 42                   | 46     | 46     | 44     | 48     | 49     | 44        | 46     | 40     |
| CIW                              | 43                   | 47     | 47     | 46     | 53     | 57     | 47        | 52     | 44     |
| WIP                              | 78                   | 70     | 64     | 68     | 62     | 82     | 72        | 65     | 85     |
| STI                              | 90                   | 90     | 90     | 90     | 88     | 89     | 86        | 86     | 86     |
| Rare Earth Element (ppm)         |                      |        |        |        |        |        |           |        |        |
| La                               | 17.45                | 16.56  | 19.81  | 20.10  | 27.73  | 14.49  | 29.84     | 41.27  | 40.24  |
| Ce                               | 39.41                | 37.23  | 44.93  | 43.29  | 61.83  | 30.32  | 59.44     | 81.14  | 81.78  |
| Pr                               | 4.02                 | 3.78   | 4.54   | 4.65   | 6.42   | 3.12   | 6.56      | 8.48   | 8.24   |
| Nd                               | 14.90                | 14.28  | 16.76  | 17.52  | 23.89  | 11.62  | 24.86     | 32.12  | 30.91  |
| Sm                               | 2.49                 | 2.40   | 2.83   | 2.99   | 3.91   | 1.96   | 4.26      | 5.40   | 5.12   |
| Eu                               | 0.58                 | 0.54   | 0.64   | 0.67   | 0.80   | 0.57   | 1.02      | 1.13   | 1.07   |
| Gd                               | 1.91                 | 1.83   | 2.19   | 2.40   | 3.08   | 1.61   | 3.63      | 4.68   | 4.31   |
| Tb                               | 0.24                 | 0.23   | 0.28   | 0.32   | 0.42   | 0.23   | 0.51      | 0.64   | 0.62   |
| Dy                               | 1.21                 | 1.17   | 1.38   | 1.65   | 2.18   | 1.31   | 2.86      | 3.66   | 3.48   |
| Ho                               | 0.21                 | 0.21   | 0.23   | 0.28   | 0.37   | 0.24   | 0.52      | 0.67   | 0.64   |
| Er                               | 0.71                 | 0.68   | 0.74   | 0.88   | 1.14   | 0.80   | 1.64      | 2.13   | 2.07   |
| Tm                               | 0.10                 | 0.09   | 0.10   | 0.12   | 0.15   | 0.11   | 0.22      | 0.28   | 0.28   |
| Yb                               | 0.75                 | 0.70   | 0.75   | 0.86   | 1.06   | 0.79   | 1.49      | 1.92   | 1.90   |
| Lu                               | 0.11                 | 0.10   | 0.11   | 0.12   | 0.15   | 0.12   | 0.21      | 0.27   | 0.27   |
| [La/Yb] <sub>N</sub>             | 15.72                | 16.06  | 18.02  | 15.84  | 17.72  | 12.39  | 13.60     | 14.57  | 14.39  |
| Eu/Eu*                           | 0.78                 | 0.76   | 0.75   | 0.74   | 0.68   | 0.95   | 0.77      | 0.67   | 0.67   |
| ΣREE                             | 84                   | 80     | 95     | 96     | 133    | 67     | 137       | 184    | 181    |
| Trace Element (ppm)              |                      |        |        |        |        |        |           |        |        |
| Li                               | 5.44                 | 16.19  | 7.38   | 7.94   | 10.94  | 5.29   | 16.18     | 21.69  | 14.89  |
| Rb                               | 30                   | 27     | 30     | 26     | 65     | 113    | 67        | 116    | 84     |
| Sr                               | 117                  | 193    | 127    | 107    | 216    | 348    | 479       | 427    | 407    |
| Ba                               | 148                  | 344    | 155    | 123    | 655    | 1322   | 720       | 1453   | 1049   |
| Y                                | 16.00                | 14.00  | 15.00  | 15.00  | 25.00  | 22.00  | 26.00     | 36.00  | 29.00  |
| Th                               | 3.78                 | 3.71   | 4.06   | 4.28   | 7.41   | 3.73   | 7.17      | 9.22   | 8.76   |
| U                                | 0.81                 | 0.73   | 0.78   | 0.89   | 1.10   | 0.74   | 1.50      | 1.64   | 1.49   |
| Zr                               | 100                  | 115    | 112    | 118    | 234    | 108    | 266       | 259    | 319    |
| Hf                               | 1.18                 | 1.06   | 1.18   | 1.26   | 1.64   | 0.93   | 2.17      | 2.46   | 2.55   |
| Nb                               | 9.00                 | 8.00   | 10.00  | 12.00  | 10.00  | 9.00   | 10.00     | 13.00  | 14.00  |
| Ta                               | 0.36                 | 0.35   | 0.37   | 0.37   | 0.52   | 0.37   | 0.58      | 0.69   | 0.73   |
| Zn                               | 16.45                | 31.20  | 15.46  | 21.44  | 61.45  | 61.86  | 80.88     | 132.52 | 82.55  |
| Co                               | 5.00                 | 5.00   | 4.00   | 5.00   | 6.00   | 6.00   | 8.00      | 10.00  | 8.00   |
| Ni                               | 24.00                | 22.00  | 21.00  | 20.00  | 22.00  | 18.00  | 23.00     | 28.00  | 24.00  |
| Sc                               | 1.69                 | 1.70   | 1.76   | 1.64   | 2.46   | 1.62   | 5.36      | 7.47   | 6.33   |
| V                                | 13.00                | 23.00  | 20.00  | 17.00  | 41.00  | 16.00  | 59.00     | 69.00  | 47.00  |
| Cr                               | 143.00               | 122.00 | 81.00  | 158.00 | 88.00  | 66.00  | 97.00     | 50.00  | 48.00  |
| Pb                               | 7.58                 | 8.55   | 7.43   | 6.60   | 9.86   | 15.18  | 14.21     | 16.26  | 12.52  |

Notes: major element oxides in weight percent (wt.%); trace elements and rare earth element in parts per million (ppm); LOI—loss on ignition; Fe<sub>2</sub>O<sub>3</sub>\*—total iron expressed as Fe<sub>2</sub>O<sub>3</sub>. Eu/Eu\* = Eu<sub>N</sub>/Sqrt(Sm<sub>N</sub> × Gd<sub>N</sub>); subscript N, chondrite normalized value [1]. CIA = 100\*(Al<sub>2</sub>O<sub>3</sub>/(Al<sub>2</sub>O<sub>3</sub> + CaO + Na<sub>2</sub>O + K<sub>2</sub>O)) [2,3]; CIW = 100\*((Al<sub>2</sub>O<sub>3</sub>/(Al<sub>2</sub>O<sub>3</sub> + CaO + Na<sub>2</sub>O)) [4]; WIP = 100\*((2\*Na<sub>2</sub>O/0.35) +

$$\begin{aligned} & (\text{MgO}/0.9) + (2*\text{K}_2\text{O}/0.25) + (\text{CaO}/0.7) \text{ [5]; STI} = 100*((\text{SiO}_2/\text{TiO}_2)/((\text{SiO}_2/\text{TiO}_2) + (\text{SiO}_2/\text{Al}_2\text{O}_3) + \\ & (\text{Al}_2\text{O}_3/\text{TiO}_2))) \text{ [6].} \end{aligned}$$

Table S2. U-Th-Pb LA-ICP-MS data for zircons from metasedimentary rocks of the Chiron Basin.

| No                                                                    | Analysis     | Th,<br>ppm | U,<br>ppm | <sup>206</sup> Pb/ <sup>204</sup> Pb | U/Th | Isotope Ratios*                      |        |                                     |        |                                     | Ages, Ma |      |                                     |      |                                     |      |                                     |      |      |     | D           |  |
|-----------------------------------------------------------------------|--------------|------------|-----------|--------------------------------------|------|--------------------------------------|--------|-------------------------------------|--------|-------------------------------------|----------|------|-------------------------------------|------|-------------------------------------|------|-------------------------------------|------|------|-----|-------------|--|
|                                                                       |              |            |           |                                      |      | <sup>206</sup> Pb/ <sup>207</sup> Pb | ±1s, % | <sup>207</sup> Pb/ <sup>235</sup> U | ±1s, % | <sup>206</sup> Pb/ <sup>238</sup> U | ±1s, %   | Rho  | <sup>206</sup> Pb/ <sup>238</sup> U | ±1s  | <sup>207</sup> Pb/ <sup>235</sup> U | ±1s  | <sup>207</sup> Pb/ <sup>206</sup> U | ±1s  | CA   | ±2s |             |  |
| Sample Y-99: a shale of the Aga-Borshchovochnyi metamorphic Formation |              |            |           |                                      |      |                                      |        |                                     |        |                                     |          |      |                                     |      |                                     |      |                                     |      |      |     |             |  |
| 1                                                                     | Y-99 Spot 1  | 101        | 188       | 41469                                | 1.9  | 17.4719                              | 1.1    | 0.6381                              | 1.9    | 0.0809                              | 1.6      | 0.82 | 501.5                               | 7.6  | 501.2                               | 7.6  | 499.7                               | 24.2 | 501  | 14  | 0.366320545 |  |
| 2                                                                     | Y-99 Spot 2  | 33         | 392       | 49717                                | 12.1 | 14.8459                              | 0.9    | 1.3537                              | 1.7    | 0.1458                              | 1.4      | 0.84 | 877.5                               | 11.5 | 869.1                               | 9.7  | 848.0                               | 18.8 | 869  | 19  | 3.474379744 |  |
| 3                                                                     | Y-99 Spot 3  | 46         | 114       | 5542                                 | 2.5  | 17.6895                              | 1.0    | 0.7285                              | 1.6    | 0.0935                              | 1.2      | 0.78 | 576.2                               | 6.7  | 555.7                               | 6.7  | 472.3                               | 21.8 |      |     |             |  |
| 4                                                                     | Y-99 Spot 4  | 158        | 379       | 39440                                | 2.4  | 17.4388                              | 0.9    | 0.6773                              | 1.5    | 0.0857                              | 1.3      | 0.83 | 530.1                               | 6.5  | 525.1                               | 6.3  | 503.8                               | 19.0 | 527  | 12  | 5.20694766  |  |
| 5                                                                     | Y-99 Spot 5  | 29         | 136       | 67881                                | 4.7  | 8.2839                               | 0.7    | 5.7439                              | 1.5    | 0.3452                              | 1.3      | 0.88 | 1911.9                              | 21.7 | 1938.0                              | 12.9 | 1966.0                              | 12.6 | 1952 | 22  | -2.7557455  |  |
| 6                                                                     | Y-99 Spot 6  | 15         | 13        | 20690                                | 0.9  | 6.7517                               | 2.0    | 8.6816                              | 2.4    | 0.4253                              | 1.3      | 0.55 | 2284.5                              | 25.0 | 2305.2                              | 21.5 | 2323.5                              | 33.9 | 2298 | 41  | -1.67726314 |  |
| 7                                                                     | Y-99 Spot 7  | 189        | 262       | 17863                                | 1.4  | 15.2561                              | 1.1    | 1.1989                              | 1.7    | 0.1327                              | 1.3      | 0.76 | 803.3                               | 10.0 | 800.1                               | 9.6  | 791.0                               | 23.5 | 801  | 18  | 1.553223151 |  |
| 8                                                                     | Y-99 Spot 8  | 71         | 91        | 46017                                | 1.3  | 6.1203                               | 1.1    | 10.8345                             | 1.8    | 0.4811                              | 1.5      | 0.81 | 2532.2                              | 30.8 | 2509.0                              | 16.9 | 2490.3                              | 17.9 | 2501 | 31  | 1.683890434 |  |
| 9                                                                     | Y-99 Spot 10 | 116        | 175       | 11122                                | 1.5  | 16.3859                              | 2.8    | 0.6776                              | 3.1    | 0.0806                              | 1.3      | 0.42 | 499.5                               | 6.2  | 525.4                               | 12.7 | 639.3                               | 60.6 | 500  | 12  | -21.8657048 |  |
| 10                                                                    | Y-99 Spot 11 | 91         | 449       | 68375                                | 5.0  | 17.0345                              | 0.9    | 0.7885                              | 1.8    | 0.0975                              | 1.5      | 0.86 | 599.5                               | 8.7  | 590.3                               | 7.9  | 555.2                               | 19.3 | 592  | 16  | 7.976343352 |  |
| 11                                                                    | Y-99 Spot 12 | 99         | 376       | 1190739                              | 3.8  | 16.9652                              | 0.9    | 0.8029                              | 1.5    | 0.0988                              | 1.2      | 0.80 | 607.6                               | 7.0  | 598.5                               | 6.8  | 564.1                               | 19.5 | 602  | 13  | 7.716341765 |  |
| 12                                                                    | Y-99 Spot 13 | 59         | 122       | 214241                               | 2.1  | 6.0873                               | 1.0    | 10.3828                             | 1.4    | 0.4586                              | 0.9      | 0.67 | 2433.3                              | 19.3 | 2469.5                              | 13.0 | 2499.4                              | 17.5 | 2469 | 26  | -2.64314437 |  |
| 13                                                                    | Y-99 Spot 14 | 75         | 124       | 90418                                | 1.7  | 15.1347                              | 1.1    | 1.2144                              | 2.0    | 0.1334                              | 1.6      | 0.84 | 807.0                               | 12.5 | 807.2                               | 11.0 | 807.8                               | 22.5 | 807  | 22  | -0.0991228  |  |
| 14                                                                    | Y-99 Spot 15 | 23         | 154       | 20158                                | 6.8  | 14.9611                              | 1.3    | 1.3190                              | 1.9    | 0.1432                              | 1.4      | 0.74 | 862.6                               | 11.4 | 854.1                               | 11.0 | 831.9                               | 26.7 | 858  | 21  | 3.696826385 |  |
| 15                                                                    | Y-99 Spot 16 | 188        | 683       | 211926                               | 3.6  | 17.3792                              | 1.1    | 0.6570                              | 1.8    | 0.0828                              | 1.5      | 0.81 | 513.1                               | 7.2  | 512.8                               | 7.3  | 511.3                               | 23.4 | 513  | 14  | 0.34541054  |  |
| 16                                                                    | Y-99 Spot 17 | 21         | 21        | 6833                                 | 1.0  | 8.8092                               | 1.2    | 5.4619                              | 2.2    | 0.3491                              | 1.8      | 0.82 | 1930.4                              | 29.5 | 1894.6                              | 18.5 | 1855.7                              | 22.3 | 1883 | 36  | 4.02560287  |  |
| 17                                                                    | Y-99 Spot 18 | 25         | 65        | 24582                                | 2.6  | 13.1726                              | 1.1    | 1.7449                              | 1.6    | 0.1668                              | 1.2      | 0.76 | 994.3                               | 11.5 | 1025.3                              | 10.6 | 1092.0                              | 21.4 |      |     |             |  |
| 18                                                                    | Y-99 Spot 19 | 77         | 165       | 66448                                | 2.2  | 16.6853                              | 1.0    | 0.7731                              | 1.7    | 0.0936                              | 1.4      | 0.83 | 576.8                               | 7.9  | 581.6                               | 7.6  | 600.2                               | 20.9 | 580  | 15  | -3.89825448 |  |
| 19                                                                    | Y-99 Spot 21 | 113        | 243       | 7266                                 | 2.2  | 17.6759                              | 1.3    | 0.6392                              | 2.0    | 0.0820                              | 1.5      | 0.75 | 507.9                               | 7.4  | 501.8                               | 8.0  | 474.0                               | 29.6 | 506  | 14  | 7.157161245 |  |
| 20                                                                    | Y-99 Spot 22 | 25         | 114       | 49243                                | 4.5  | 16.8279                              | 1.4    | 0.7849                              | 2.0    | 0.0958                              | 1.4      | 0.71 | 589.9                               | 7.9  | 588.3                               | 8.8  | 581.8                               | 30.0 | 589  | 15  | 1.404530867 |  |
| 21                                                                    | Y-99 Spot 23 | 239        | 291       | 31508                                | 1.2  | 16.9011                              | 1.0    | 0.7445                              | 1.6    | 0.0913                              | 1.3      | 0.80 | 563.2                               | 7.0  | 565.0                               | 7.1  | 572.3                               | 21.3 | 564  | 13  | -1.58879061 |  |
| 22                                                                    | Y-99 Spot 25 | 36         | 92        | 204094                               | 2.6  | 16.9383                              | 1.2    | 0.7682                              | 1.8    | 0.0944                              | 1.4      | 0.77 | 581.6                               | 7.8  | 578.7                               | 8.0  | 567.6                               | 25.1 | 580  | 15  | 2.472651774 |  |
| 23                                                                    | Y-99 Spot 26 | 26         | 14        | 48764                                | 0.6  | 6.0074                               | 1.2    | 10.9960                             | 1.8    | 0.4793                              | 1.3      | 0.76 | 2524.2                              | 28.1 | 2522.8                              | 16.5 | 2521.6                              | 19.4 | 2522 | 32  | 0.101990467 |  |
| 24                                                                    | Y-99 Spot 27 | 181        | 365       | 26021                                | 2.0  | 17.0698                              | 0.8    | 0.7560                              | 1.3    | 0.0936                              | 1.0      | 0.79 | 577.0                               | 5.7  | 571.7                               | 5.7  | 550.7                               | 17.5 | 574  | 11  | 4.77839338  |  |
| 25                                                                    | Y-99 Spot 28 | 122        | 245       | 31966                                | 2.0  | 16.9705                              | 1.2    | 0.7756                              | 1.9    | 0.0955                              | 1.4      | 0.78 | 588.0                               | 8.1  | 583.0                               | 8.3  | 563.4                               | 25.6 | 586  | 15  | 4.375147975 |  |
| 26                                                                    | Y-99 Spot 29 | 236        | 154       | 50667                                | 0.7  | 9.4110                               | 1.0    | 4.3532                              | 1.5    | 0.2973                              | 1.2      | 0.77 | 1677.7                              | 17.0 | 1703.5                              | 12.4 | 1735.4                              | 17.5 | 1705 | 25  | -3.32350845 |  |
| 27                                                                    | Y-99 Spot 30 | 3          | 254       | 74853                                | 94.8 | 14.5370                              | 1.0    | 1.4590                              | 1.6    | 0.1539                              | 1.2      | 0.77 | 922.7                               | 10.3 | 913.6                               | 9.4  | 891.5                               | 20.7 | 916  | 18  | 3.500200708 |  |
| 28                                                                    | Y-99 Spot 31 | 36         | 96        | 3031135                              | 2.7  | 16.6641                              | 1.0    | 0.7858                              | 1.5    | 0.0950                              | 1.2      | 0.77 | 585.1                               | 6.6  | 588.8                               | 6.9  | 603.0                               | 21.4 | 587  | 13  | -2.95963923 |  |
| 29                                                                    | Y-99 Spot 32 | 32         | 269       | 133030                               | 8.5  | 17.1390                              | 0.8    | 0.6718                              | 1.4    | 0.0835                              | 1.1      | 0.81 | 517.3                               | 5.5  | 521.8                               | 5.6  | 541.8                               | 17.6 | 519  | 11  | -4.53623503 |  |
| 30                                                                    | Y-99 Spot 33 | 26         | 117       | 34787                                | 4.5  | 17.2128                              | 1.3    | 0.6510                              | 1.8    | 0.0813                              | 1.3      | 0.71 | 503.9                               | 6.2  | 509.1                               | 7.2  | 532.4                               | 27.4 | 505  | 12  | -5.35654151 |  |
| 31                                                                    | Y-99 Spot 34 | 86         | 260       | 50176                                | 3.0  | 16.6590                              | 1.0    | 0.8211                              | 1.5    | 0.0992                              | 1.1      | 0.73 | 610.0                               | 6.5  | 608.6                               | 7.0  | 603.6                               | 22.7 | 610  | 12  | 1.05871797  |  |
| 32                                                                    | Y-99 Spot 35 | 152        | 302       | 14989                                | 2.0  | 16.8892                              | 1.2    | 0.8281                              | 1.9    | 0.1015                              | 1.5      | 0.77 | 623.1                               | 8.9  | 612.6                               | 9.0  | 573.8                               | 27.0 | 618  | 17  | 8.586390301 |  |
| 33                                                                    | Y-99 Spot 36 | 26         | 83        | 6797                                 | 3.1  | 16.6388                              | 1.2    | 0.8750                              | 1.9    | 0.1056                              | 1.5      | 0.77 | 647.4                               | 9.0  | 638.3                               | 9.0  | 606.2                               | 26.3 | 643  | 17  | 6.782632723 |  |
| 34                                                                    | Y-99 Spot 37 | 65         | 157       | 10704                                | 2.4  | 16.8575                              | 1.1    | 0.7440                              | 1.7    | 0.0910                              | 1.2      | 0.75 | 561.5                               | 6.7  | 564.7                               | 7.2  | 578.0                               | 23.9 | 563  | 13  | -2.85664139 |  |
| 35                                                                    | Y-99 Spot 38 | 55         | 82        | 19292                                | 1.5  | 5.8481                               | 1.0    | 11.7475                             | 1.7    | 0.4985                              | 1.4      | 0.81 | 2607.3                              | 29.1 | 2584.5                              | 15.6 | 2566.7                              | 16.3 | 2577 | 29  | 1.582785821 |  |
| 36                                                                    | Y-99 Spot 39 | 55         | 152       | 10587                                | 2.8  | 17.1304                              | 1.7    | 0.7603                              | 2.1    | 0.0945                              | 1.2      | 0.59 | 582.1                               | 6.8  | 574.2                               | 9.1  | 542.9                               | 36.6 | 581  | 13  | 7.208374877 |  |
| 37                                                                    | Y-99 Spot 40 | 137        | 244       | 44144                                | 1.8  | 15.3186                              | 1.1    | 1.2171                              | 1.6    | 0.1353                              | 1.2      | 0.75 | 817.9                               | 9.5  | 808.4                               | 9.2  | 782.4                               | 22.9 | 812  | 17  | 4.530735959 |  |
| 38                                                                    | Y-99 Spot 41 | 33         | 96        | 147982                               | 2.9  | 14.0348                              | 1.2    | 1.5974                              | 1.8    | 0.1627                              | 1.3      | 0.73 | 971.6                               | 11.5 | 969.2                               | 11.0 | 963.8                               | 24.7 | 970  | 21  | 0.813206368 |  |
| 39                                                                    | Y-99 Spot 42 | 56         | 185       | 47702                                | 3.3  | 16.7177                              | 1.2    | 0.7684                              | 1.6    | 0.0932                              | 1.2      | 0.71 | 574.5                               | 6.3  | 578.8                               | 7.2  | 596.0                               | 24.9 | 576  | 12  | -3.60733574 |  |
| 40                                                                    | Y-99 Spot 43 | 95         | 207       | 9674                                 | 2.2  | 17.2025                              | 1.7    | 0.7549                              | 2.5    | 0.0942                              | 1.8      | 0.73 | 580.5                               | 10.1 | 571.1                               | 10.9 | 533.7                               | 37.5 | 577  | 19  | 8.756978843 |  |
| 41                                                                    | Y-99 Spot 44 | 81         | 161       | 38539                                | 2.0  | 17.3819                              | 1.1    | 0.6530                              | 1.6    | 0.0824                              | 1.2      | 0.72 | 510.1                               | 5.8  | 510.3                               | 6.6  | 511.0                               | 25.0 | 510  | 11  | -0.16961437 |  |
| 42                                                                    | Y-99 Spot 45 | 113        | 231       | 68018                                | 2.0  | 6.0284                               | 0.9    | 10.7497                             | 1.4    | 0.4702                              | 1.1      | 0.75 | 2484.4                              | 21.8 | 2501.7                              | 13.0 | 2515.8                              | 15.4 | 2505 | 26  | -1.24574097 |  |
| 43                                                                    | Y-99 Spot 46 | 54         | 67        | 13054                                | 1.3  | 14.8083                              | 1.2    | 1.2446                              | 1.7    | 0.1337                              | 1.1      | 0.68 | 809.1                               | 8.5  | 821.0                               | 9.3  | 853.3                               | 25.3 | 813  | 16  | -5.1748679  |  |
| 44                                                                    | Y-99 Spot 47 | 31         | 46        | 9891                                 | 1.5  | 16.7614                              | 1.8    | 0.6933                              | 2.3    | 0.0843                              | 1.4      | 0.62 | 521.9                               | 7.2  | 534.8                               | 9.7  | 590.4                               | 39.7 | 524  | 14  | -11.6064551 |  |
| 45                                                                    | Y-99 Spot 48 | 61         | 180       | 38678                                | 2.9  | 16.4721                              | 1.2    | 0.7899                              | 1.8    | 0.0944                              | 1.3      | 0.73 | 581.6                               | 7.1  | 591.1                               | 7.9  | 628.0                               | 26.2 | 584  | 14  | -7.38698658 |  |
| 46                                                                    | Y-99 Spot 49 | 3          | 73        | 58527                                | 29.1 | 16.6052                              | 1.0    | 0.8305                              | 1.7    | 0.1001                              | 1.4      | 0.81 | 614.8                               | 8.2  | 613.9                               | 8.0  | 610.6                               | 22.2 | 614  | 15  | 0.682827595 |  |
| 47                                                                    | Y-99 Spot 50 | 611        | 316       | 20882                                | 0.5  | 17.4235                              | 0.9    | 0.6601                              | 1.3    | 0.0834                              | 1.0      | 0.75 | 516.7                               | 4.9  | 514.7                               | 5.3  | 505.8                               | 19.0 | 516  | 9.5 | 2.158810407 |  |
| 48                                                                    | Y-99 Spot 51 | 58         | 115       | 36255                                | 2.0  | 16.7702                              | 1.0    | 0.7779                              | 1.6    | 0.0947                              | 1.3      | 0.80 | 583.0                               | 7.2  | 584.3                               | 7.2  | 589.2                               | 21.0 | 584  | 1   |             |  |

|    |              |    |     |       |     |        |     |        |     |        |     |      |        |      |        |      |        |      |  |  |  |  |  |  |  |  |  |  |  |  |  |  |  |  |  |  |  |  |  |  |  |  |  |  |  |  |  |  |  |  |  |  |  |  |  |  |  |  |  |  |  |  |  |  |  |  |  |  |  |  |  |  |  |  |  |  |  |  |  |  |  |  |  |  |  |  |  |  |  |  |  |  |  |  |  |  |  |  |  |  |  |  |  |  |  |  |  |  |  |  |  |  |  |  |  |  |  |  |  |  |  |  |  |  |  |  |  |  |  |  |  |  |  |  |  |  |  |  |  |  |  |  |  |  |  |  |  |  |  |  |  |  |  |  |  |  |  |  |  |  |  |  |  |  |  |  |  |  |  |  |  |  |  |  |  |  |  |  |  |  |  |  |  |  |  |  |  |  |  |  |  |  |  |  |  |  |  |  |  |  |  |  |  |  |  |  |  |  |  |  |  |  |  |  |  |  |  |  |  |  |  |  |  |  |  |  |  |  |  |  |  |  |  |  |  |  |  |  |  |  |  |  |  |  |  |  |  |  |  |  |  |  |  |  |  |  |  |  |  |  |  |  |  |  |  |  |  |  |  |  |  |  |  |  |  |  |  |  |  |  |  |  |  |  |  |  |  |  |  |  |  |  |  |  |  |  |  |  |  |  |  |  |  |  |  |  |  |  |  |  |  |  |  |  |  |  |  |  |  |  |  |  |  |  |  |  |  |  |  |  |  |  |  |  |  |  |  |  |  |  |  |  |  |  |  |  |  |  |  |  |  |  |  |  |  |  |  |  |  |  |  |  |  |  |  |  |  |  |  |  |  |  |  |  |  |  |  |  |  |  |  |  |  |  |  |  |  |  |  |  |  |  |  |  |  |  |  |  |  |  |  |  |  |  |  |  |  |  |  |  |  |  |  |  |  |  |  |  |  |  |  |  |  |  |  |  |  |  |  |  |  |  |  |  |  |  |  |  |  |  |  |  |  |  |  |  |  |  |  |  |  |  |  |  |  |  |  |  |  |  |  |  |  |  |  |  |  |  |  |  |  |  |  |  |  |  |  |  |  |  |  |  |  |  |  |  |  |  |  |  |  |  |  |  |  |  |  |  |  |  |  |  |  |  |  |  |  |  |  |  |  |  |  |  |  |  |  |  |  |  |  |  |  |  |  |  |  |  |  |  |  |  |  |  |  |  |  |  |  |  |  |  |  |  |  |  |  |  |  |  |  |  |  |  |  |  |  |  |  |  |  |  |  |  |  |  |  |  |  |  |  |  |  |  |  |  |  |  |  |  |  |  |  |  |  |  |  |  |  |  |  |  |  |  |  |  |  |  |  |  |  |  |  |  |  |  |  |  |  |  |  |  |  |  |  |  |  |  |  |  |  |  |  |  |  |  |  |  |  |  |  |  |  |  |  |  |  |  |  |  |  |  |  |  |  |  |  |  |  |  |  |  |  |  |  |  |  |  |  |  |  |  |  |  |  |  |  |  |  |  |  |  |  |  |  |  |  |  |  |  |  |  |  |  |  |  |  |  |  |  |  |  |  |  |  |  |  |  |  |  |  |  |  |  |  |  |  |  |  |  |  |  |  |  |  |  |  |  |  |  |  |  |  |  |  |  |  |  |  |  |  |  |  |  |  |  |  |  |  |  |  |  |  |  |  |  |  |  |  |  |  |  |  |  |  |  |  |  |  |  |  |  |  |  |  |  |  |  |  |  |  |  |  |  |  |  |  |  |  |  |  |  |  |  |  |  |  |  |  |  |  |  |  |  |  |  |  |  |  |  |  |  |  |  |  |  |  |  |  |  |  |  |  |  |  |  |  |  |  |  |  |  |  |  |  |  |  |  |  |  |  |  |  |  |  |  |  |  |  |  |  |  |  |  |  |  |  |  |  |  |  |  |  |  |  |  |  |  |  |  |  |  |  |  |  |  |  |  |  |  |  |  |  |  |  |  |  |  |  |  |  |  |  |  |  |  |  |  |  |  |  |  |  |  |  |  |  |  |  |  |  |  |  |  |  |  |  |  |  |  |  |  |  |  |  |  |  |  |  |  |  |  |  |  |  |  |  |  |  |  |  |  |  |  |  |  |  |  |  |  |  |  |  |  |  |  |  |  |  |  |  |  |  |  |  |  |  |  |  |  |  |  |  |  |  |  |  |  |  |  |  |  |  |  |  |  |  |  |  |  |  |  |  |  |  |  |  |  |  |  |  |  |  |  |  |  |  |  |  |  |  |  |  |  |  |  |  |  |  |  |  |  |  |  |  |  |  |  |  |  |  |  |  |  |  |  |  |  |  |  |  |  |  |  |  |  |  |  |  |  |  |  |  |  |  |  |  |  |  |  |  |  |  |  |  |  |  |  |  |  |  |  |  |  |  |  |  |  |  |  |  |  |  |  |  |  |  |  |  |  |  |  |  |  |  |  |  |  |  |  |  |  |  |  |  |  |  |  |  |  |  |  |  |  |  |  |  |  |  |  |  |  |  |  |  |  |  |  |  |  |  |  |  |  |  |  |  |  |  |  |  |  |  |  |  |  |  |  |  |  |  |  |  |  |  |  |  |  |  |  |  |  |  |  |  |  |  |  |  |  |  |  |  |  |  |  |  |  |  |  |  |  |  |  |  |  |  |  |  |  |  |  |  |  |  |  |  |  |  |  |  |  |  |  |  |  |  |  |  |  |  |  |  |  |  |  |  |  |  |  |  |  |  |  |  |  |  |  |  |  |  |  |  |  |  |  |  |  |  |  |  |  |  |  |  |  |  |  |  |  |  |  |  |  |  |  |  |  |  |  |  |  |  |  |  |  |  |  |  |  |  |  |  |  |  |  |  |  |  |  |  |  |  |  |  |  |  |  |  |  |  |  |  |  |  |  |  |  |  |  |  |  |  |  |  |  |  |  |  |  |  |  |  |  |  |  |  |  |  |  |  |  |  |  |  |  |  |  |  |  |  |  |  |  |  |  |  |  |  |  |  |  |  |  |  |  |  |  |  |  |  |  |  |  |  |  |  |  |  |  |  |  |  |  |  |  |  |  |  |  |  |  |  |  |  |  |  |  |  |  |  |  |  |  |  |  |  |  |  |  |  |  |  |  |  |  |  |  |  |  |  |  |  |  |  |  |  |  |  |  |  |  |  |  |  |  |  |  |  |  |  |  |  |  |  |  |  |  |  |  |  |  |  |  |  |  |  |  |  |  |  |  |  |  |  |  |  |  |  |  |  |  |  |  |  |  |  |  |  |  |  |  |  |  |  |  |  |  |  |  |  |  |  |  |  |  |  |  |  |  |  |  |  |  |  |  |  |  |  |  |  |  |  |  |  |  |  |  |  |  |  |  |  |  |  |  |  |  |  |  |  |  |  |  |  |  |  |
|----|--------------|----|-----|-------|-----|--------|-----|--------|-----|--------|-----|------|--------|------|--------|------|--------|------|--|--|--|--|--|--|--|--|--|--|--|--|--|--|--|--|--|--|--|--|--|--|--|--|--|--|--|--|--|--|--|--|--|--|--|--|--|--|--|--|--|--|--|--|--|--|--|--|--|--|--|--|--|--|--|--|--|--|--|--|--|--|--|--|--|--|--|--|--|--|--|--|--|--|--|--|--|--|--|--|--|--|--|--|--|--|--|--|--|--|--|--|--|--|--|--|--|--|--|--|--|--|--|--|--|--|--|--|--|--|--|--|--|--|--|--|--|--|--|--|--|--|--|--|--|--|--|--|--|--|--|--|--|--|--|--|--|--|--|--|--|--|--|--|--|--|--|--|--|--|--|--|--|--|--|--|--|--|--|--|--|--|--|--|--|--|--|--|--|--|--|--|--|--|--|--|--|--|--|--|--|--|--|--|--|--|--|--|--|--|--|--|--|--|--|--|--|--|--|--|--|--|--|--|--|--|--|--|--|--|--|--|--|--|--|--|--|--|--|--|--|--|--|--|--|--|--|--|--|--|--|--|--|--|--|--|--|--|--|--|--|--|--|--|--|--|--|--|--|--|--|--|--|--|--|--|--|--|--|--|--|--|--|--|--|--|--|--|--|--|--|--|--|--|--|--|--|--|--|--|--|--|--|--|--|--|--|--|--|--|--|--|--|--|--|--|--|--|--|--|--|--|--|--|--|--|--|--|--|--|--|--|--|--|--|--|--|--|--|--|--|--|--|--|--|--|--|--|--|--|--|--|--|--|--|--|--|--|--|--|--|--|--|--|--|--|--|--|--|--|--|--|--|--|--|--|--|--|--|--|--|--|--|--|--|--|--|--|--|--|--|--|--|--|--|--|--|--|--|--|--|--|--|--|--|--|--|--|--|--|--|--|--|--|--|--|--|--|--|--|--|--|--|--|--|--|--|--|--|--|--|--|--|--|--|--|--|--|--|--|--|--|--|--|--|--|--|--|--|--|--|--|--|--|--|--|--|--|--|--|--|--|--|--|--|--|--|--|--|--|--|--|--|--|--|--|--|--|--|--|--|--|--|--|--|--|--|--|--|--|--|--|--|--|--|--|--|--|--|--|--|--|--|--|--|--|--|--|--|--|--|--|--|--|--|--|--|--|--|--|--|--|--|--|--|--|--|--|--|--|--|--|--|--|--|--|--|--|--|--|--|--|--|--|--|--|--|--|--|--|--|--|--|--|--|--|--|--|--|--|--|--|--|--|--|--|--|--|--|--|--|--|--|--|--|--|--|--|--|--|--|--|--|--|--|--|--|--|--|--|--|--|--|--|--|--|--|--|--|--|--|--|--|--|--|--|--|--|--|--|--|--|--|--|--|--|--|--|--|--|--|--|--|--|--|--|--|--|--|--|--|--|--|--|--|--|--|--|--|--|--|--|--|--|--|--|--|--|--|--|--|--|--|--|--|--|--|--|--|--|--|--|--|--|--|--|--|--|--|--|--|--|--|--|--|--|--|--|--|--|--|--|--|--|--|--|--|--|--|--|--|--|--|--|--|--|--|--|--|--|--|--|--|--|--|--|--|--|--|--|--|--|--|--|--|--|--|--|--|--|--|--|--|--|--|--|--|--|--|--|--|--|--|--|--|--|--|--|--|--|--|--|--|--|--|--|--|--|--|--|--|--|--|--|--|--|--|--|--|--|--|--|--|--|--|--|--|--|--|--|--|--|--|--|--|--|--|--|--|--|--|--|--|--|--|--|--|--|--|--|--|--|--|--|--|--|--|--|--|--|--|--|--|--|--|--|--|--|--|--|--|--|--|--|--|--|--|--|--|--|--|--|--|--|--|--|--|--|--|--|--|--|--|--|--|--|--|--|--|--|--|--|--|--|--|--|--|--|--|--|--|--|--|--|--|--|--|--|--|--|--|--|--|--|--|--|--|--|--|--|--|--|--|--|--|--|--|--|--|--|--|--|--|--|--|--|--|--|--|--|--|--|--|--|--|--|--|--|--|--|--|--|--|--|--|--|--|--|--|--|--|--|--|--|--|--|--|--|--|--|--|--|--|--|--|--|--|--|--|--|--|--|--|--|--|--|--|--|--|--|--|--|--|--|--|--|--|--|--|--|--|--|--|--|--|--|--|--|--|--|--|--|--|--|--|--|--|--|--|--|--|--|--|--|--|--|--|--|--|--|--|--|--|--|--|--|--|--|--|--|--|--|--|--|--|--|--|--|--|--|--|--|--|--|--|--|--|--|--|--|--|--|--|--|--|--|--|--|--|--|--|--|--|--|--|--|--|--|--|--|--|--|--|--|--|--|--|--|--|--|--|--|--|--|--|--|--|--|--|--|--|--|--|--|--|--|--|--|--|--|--|--|--|--|--|--|--|--|--|--|--|--|--|--|--|--|--|--|--|--|--|--|--|--|--|--|--|--|--|--|--|--|--|--|--|--|--|--|--|--|--|--|--|--|--|--|--|--|--|--|--|--|--|--|--|--|--|--|--|--|--|--|--|--|--|--|--|--|--|--|--|--|--|--|--|--|--|--|--|--|--|--|--|--|--|--|--|--|--|--|--|--|--|--|--|--|--|--|--|--|--|--|--|--|--|--|--|--|--|--|--|--|--|--|--|--|--|--|--|--|--|--|--|--|--|--|--|--|--|--|--|--|--|--|--|--|--|--|--|--|--|--|--|--|--|--|--|--|--|--|--|--|--|--|--|--|--|--|--|--|--|--|--|--|--|--|--|--|--|--|--|--|--|--|--|--|--|--|--|--|--|--|--|--|--|--|--|--|--|--|--|--|--|--|--|--|--|--|--|--|--|--|--|--|--|--|--|--|--|--|--|--|--|--|--|--|--|--|--|--|--|--|--|--|--|--|--|--|--|--|--|--|--|--|--|--|--|--|--|--|--|--|--|--|--|--|--|--|--|--|--|--|--|--|--|--|--|--|--|--|--|--|--|--|--|--|--|--|--|--|--|--|--|--|--|--|--|--|--|--|--|--|--|--|--|--|--|--|--|--|--|--|--|--|--|--|--|--|--|--|--|--|--|--|--|--|--|--|--|--|--|--|--|--|--|--|--|--|--|--|--|--|--|--|--|--|--|--|--|--|--|--|--|--|--|--|--|--|--|--|--|--|--|--|--|--|--|--|--|--|--|--|--|--|--|--|--|--|--|--|--|--|--|--|--|--|--|--|--|--|--|--|--|--|--|--|--|--|--|--|--|--|--|--|--|--|--|--|--|--|--|--|--|--|--|--|--|--|--|--|--|--|--|--|--|--|--|--|--|--|--|--|--|--|--|--|--|--|--|--|--|--|--|--|--|--|--|--|--|--|--|--|--|--|--|--|--|--|--|--|--|--|--|--|--|--|--|--|--|
| 57 | Y--9 Spot 60 | 54 | 125 | 86362 | 2.3 | 9.5220 | 1.0 | 4.1321 | 1.8 | 0.2855 | 1.5 | 0.83 | 1618.9 | 21.1 | 1660.7 | 14.6 | 1713.8 | 18.4 |  |  |  |  |  |  |  |  |  |  |  |  |  |  |  |  |  |  |  |  |  |  |  |  |  |  |  |  |  |  |  |  |  |  |  |  |  |  |  |  |  |  |  |  |  |  |  |  |  |  |  |  |  |  |  |  |  |  |  |  |  |  |  |  |  |  |  |  |  |  |  |  |  |  |  |  |  |  |  |  |  |  |  |  |  |  |  |  |  |  |  |  |  |  |  |  |  |  |  |  |  |  |  |  |  |  |  |  |  |  |  |  |  |  |  |  |  |  |  |  |  |  |  |  |  |  |  |  |  |  |  |  |  |  |  |  |  |  |  |  |  |  |  |  |  |  |  |  |  |  |  |  |  |  |  |  |  |  |  |  |  |  |  |  |  |  |  |  |  |  |  |  |  |  |  |  |  |  |  |  |  |  |  |  |  |  |  |  |  |  |  |  |  |  |  |  |  |  |  |  |  |  |  |  |  |  |  |  |  |  |  |  |  |  |  |  |  |  |  |  |  |  |  |  |  |  |  |  |  |  |  |  |  |  |  |  |  |  |  |  |  |  |  |  |  |  |  |  |  |  |  |  |  |  |  |  |  |  |  |  |  |  |  |  |  |  |  |  |  |  |  |  |  |  |  |  |  |  |  |  |  |  |  |  |  |  |  |  |  |  |  |  |  |  |  |  |  |  |  |  |  |  |  |  |  |  |  |  |  |  |  |  |  |  |  |  |  |  |  |  |  |  |  |  |  |  |  |  |  |  |  |  |  |  |  |  |  |  |  |  |  |  |  |  |  |  |  |  |  |  |  |  |  |  |  |  |  |  |  |  |  |  |  |  |  |  |  |  |  |  |  |  |  |  |  |  |  |  |  |  |  |  |  |  |  |  |  |  |  |  |  |  |  |  |  |  |  |  |  |  |  |  |  |  |  |  |  |  |  |  |  |  |  |  |  |  |  |  |  |  |  |  |  |  |  |  |  |  |  |  |  |  |  |  |  |  |  |  |  |  |  |  |  |  |  |  |  |  |  |  |  |  |  |  |  |  |  |  |  |  |  |  |  |  |  |  |  |  |  |  |  |  |  |  |  |  |  |  |  |  |  |  |  |  |  |  |  |  |  |  |  |  |  |  |  |  |  |  |  |  |  |  |  |  |  |  |  |  |  |  |  |  |  |  |  |  |  |  |  |  |  |  |  |  |  |  |  |  |  |  |  |  |  |  |  |  |  |  |  |  |  |  |  |  |  |  |  |  |  |  |  |  |  |  |  |  |  |  |  |  |  |  |  |  |  |  |  |  |  |  |  |  |  |  |  |  |  |  |  |  |  |  |  |  |  |  |  |  |  |  |  |  |  |  |  |  |  |  |  |  |  |  |  |  |  |  |  |  |  |  |  |  |  |  |  |  |  |  |  |  |  |  |  |  |  |  |  |  |  |  |  |  |  |  |  |  |  |  |  |  |  |  |  |  |  |  |  |  |  |  |  |  |  |  |  |  |  |  |  |  |  |  |  |  |  |  |  |  |  |  |  |  |  |  |  |  |  |  |  |  |  |  |  |  |  |  |  |  |  |  |  |  |  |  |  |  |  |  |  |  |  |  |  |  |  |  |  |  |  |  |  |  |  |  |  |  |  |  |  |  |  |  |  |  |  |  |  |  |  |  |  |  |  |  |  |  |  |  |  |  |  |  |  |  |  |  |  |  |  |  |  |  |  |  |  |  |  |  |  |  |  |  |  |  |  |  |  |  |  |  |  |  |  |  |  |  |  |  |  |  |  |  |  |  |  |  |  |  |  |  |  |  |  |  |  |  |  |  |  |  |  |  |  |  |  |  |  |  |  |  |  |  |  |  |  |  |  |  |  |  |  |  |  |  |  |  |  |  |  |  |  |  |  |  |  |  |  |  |  |  |  |  |  |  |  |  |  |  |  |  |  |  |  |  |  |  |  |  |  |  |  |  |  |  |  |  |  |  |  |  |  |  |  |  |  |  |  |  |  |  |  |  |  |  |  |  |  |  |  |  |  |  |  |  |  |  |  |  |  |  |  |  |  |  |  |  |  |  |  |  |  |  |  |  |  |  |  |  |  |  |  |  |  |  |  |  |  |  |  |  |  |  |  |  |  |  |  |  |  |  |  |  |  |  |  |  |  |  |  |  |  |  |  |  |  |  |  |  |  |  |  |  |  |  |  |  |  |  |  |  |  |  |  |  |  |  |  |  |  |  |  |  |  |  |  |  |  |  |  |  |  |  |  |  |  |  |  |  |  |  |  |  |  |  |  |  |  |  |  |  |  |  |  |  |  |  |  |  |  |  |  |  |  |  |  |  |  |  |  |  |  |  |  |  |  |  |  |  |  |  |  |  |  |  |  |  |  |  |  |  |  |  |  |  |  |  |  |  |  |  |  |  |  |  |  |  |  |  |  |  |  |  |  |  |  |  |  |  |  |  |  |  |  |  |  |  |  |  |  |  |  |  |  |  |  |  |  |  |  |  |  |  |  |  |  |  |  |  |  |  |  |  |  |  |  |  |  |  |  |  |  |  |  |  |  |  |  |  |  |  |  |  |  |  |  |  |  |  |  |  |  |  |  |  |  |  |  |  |  |  |  |  |  |  |  |  |  |  |  |  |  |  |  |  |  |  |  |  |  |  |  |  |  |  |  |  |  |  |  |  |  |  |  |  |  |  |  |  |  |  |  |  |  |  |  |  |  |  |  |  |  |  |  |  |  |  |  |  |  |  |  |  |  |  |  |  |  |  |  |  |  |  |  |  |  |  |  |  |  |  |  |  |  |  |  |  |  |  |  |  |  |  |  |  |  |  |  |  |  |  |  |  |  |  |  |  |  |  |  |  |  |  |  |  |  |  |  |  |  |  |  |  |  |  |  |  |  |  |  |  |  |  |  |  |  |  |  |  |  |  |  |  |  |  |  |  |  |  |  |  |  |  |  |  |  |  |  |  |  |  |  |  |  |  |  |  |  |  |  |  |  |  |  |  |  |  |  |  |  |  |  |  |  |  |  |  |  |  |  |  |  |  |  |  |  |  |  |  |  |  |  |  |  |  |  |  |  |  |  |  |  |  |  |  |  |  |  |  |  |  |  |  |  |  |  |  |  |  |  |  |  |  |  |  |  |  |  |  |  |  |  |  |  |  |  |  |  |  |  |  |  |  |  |  |  |  |  |  |  |  |  |  |  |  |  |  |  |  |  |  |  |  |  |  |  |  |  |  |  |  |  |  |  |  |  |  |  |  |  |  |  |  |  |  |  |  |  |  |  |  |  |  |  |  |  |  |  |  |  |  |  |  |  |  |  |  |  |  |  |  |  |  |  |  |  |  |  |  |  |  |  |  |  |  |  |  |  |  |  |
|----|--------------|----|-----|-------|-----|--------|-----|--------|-----|--------|-----|------|--------|------|--------|------|--------|------|--|--|--|--|--|--|--|--|--|--|--|--|--|--|--|--|--|--|--|--|--|--|--|--|--|--|--|--|--|--|--|--|--|--|--|--|--|--|--|--|--|--|--|--|--|--|--|--|--|--|--|--|--|--|--|--|--|--|--|--|--|--|--|--|--|--|--|--|--|--|--|--|--|--|--|--|--|--|--|--|--|--|--|--|--|--|--|--|--|--|--|--|--|--|--|--|--|--|--|--|--|--|--|--|--|--|--|--|--|--|--|--|--|--|--|--|--|--|--|--|--|--|--|--|--|--|--|--|--|--|--|--|--|--|--|--|--|--|--|--|--|--|--|--|--|--|--|--|--|--|--|--|--|--|--|--|--|--|--|--|--|--|--|--|--|--|--|--|--|--|--|--|--|--|--|--|--|--|--|--|--|--|--|--|--|--|--|--|--|--|--|--|--|--|--|--|--|--|--|--|--|--|--|--|--|--|--|--|--|--|--|--|--|--|--|--|--|--|--|--|--|--|--|--|--|--|--|--|--|--|--|--|--|--|--|--|--|--|--|--|--|--|--|--|--|--|--|--|--|--|--|--|--|--|--|--|--|--|--|--|--|--|--|--|--|--|--|--|--|--|--|--|--|--|--|--|--|--|--|--|--|--|--|--|--|--|--|--|--|--|--|--|--|--|--|--|--|--|--|--|--|--|--|--|--|--|--|--|--|--|--|--|--|--|--|--|--|--|--|--|--|--|--|--|--|--|--|--|--|--|--|--|--|--|--|--|--|--|--|--|--|--|--|--|--|--|--|--|--|--|--|--|--|--|--|--|--|--|--|--|--|--|--|--|--|--|--|--|--|--|--|--|--|--|--|--|--|--|--|--|--|--|--|--|--|--|--|--|--|--|--|--|--|--|--|--|--|--|--|--|--|--|--|--|--|--|--|--|--|--|--|--|--|--|--|--|--|--|--|--|--|--|--|--|--|--|--|--|--|--|--|--|--|--|--|--|--|--|--|--|--|--|--|--|--|--|--|--|--|--|--|--|--|--|--|--|--|--|--|--|--|--|--|--|--|--|--|--|--|--|--|--|--|--|--|--|--|--|--|--|--|--|--|--|--|--|--|--|--|--|--|--|--|--|--|--|--|--|--|--|--|--|--|--|--|--|--|--|--|--|--|--|--|--|--|--|--|--|--|--|--|--|--|--|--|--|--|--|--|--|--|--|--|--|--|--|--|--|--|--|--|--|--|--|--|--|--|--|--|--|--|--|--|--|--|--|--|--|--|--|--|--|--|--|--|--|--|--|--|--|--|--|--|--|--|--|--|--|--|--|--|--|--|--|--|--|--|--|--|--|--|--|--|--|--|--|--|--|--|--|--|--|--|--|--|--|--|--|--|--|--|--|--|--|--|--|--|--|--|--|--|--|--|--|--|--|--|--|--|--|--|--|--|--|--|--|--|--|--|--|--|--|--|--|--|--|--|--|--|--|--|--|--|--|--|--|--|--|--|--|--|--|--|--|--|--|--|--|--|--|--|--|--|--|--|--|--|--|--|--|--|--|--|--|--|--|--|--|--|--|--|--|--|--|--|--|--|--|--|--|--|--|--|--|--|--|--|--|--|--|--|--|--|--|--|--|--|--|--|--|--|--|--|--|--|--|--|--|--|--|--|--|--|--|--|--|--|--|--|--|--|--|--|--|--|--|--|--|--|--|--|--|--|--|--|--|--|--|--|--|--|--|--|--|--|--|--|--|--|--|--|--|--|--|--|--|--|--|--|--|--|--|--|--|--|--|--|--|--|--|--|--|--|--|--|--|--|--|--|--|--|--|--|--|--|--|--|--|--|--|--|--|--|--|--|--|--|--|--|--|--|--|--|--|--|--|--|--|--|--|--|--|--|--|--|--|--|--|--|--|--|--|--|--|--|--|--|--|--|--|--|--|--|--|--|--|--|--|--|--|--|--|--|--|--|--|--|--|--|--|--|--|--|--|--|--|--|--|--|--|--|--|--|--|--|--|--|--|--|--|--|--|--|--|--|--|--|--|--|--|--|--|--|--|--|--|--|--|--|--|--|--|--|--|--|--|--|--|--|--|--|--|--|--|--|--|--|--|--|--|--|--|--|--|--|--|--|--|--|--|--|--|--|--|--|--|--|--|--|--|--|--|--|--|--|--|--|--|--|--|--|--|--|--|--|--|--|--|--|--|--|--|--|--|--|--|--|--|--|--|--|--|--|--|--|--|--|--|--|--|--|--|--|--|--|--|--|--|--|--|--|--|--|--|--|--|--|--|--|--|--|--|--|--|--|--|--|--|--|--|--|--|--|--|--|--|--|--|--|--|--|--|--|--|--|--|--|--|--|--|--|--|--|--|--|--|--|--|--|--|--|--|--|--|--|--|--|--|--|--|--|--|--|--|--|--|--|--|--|--|--|--|--|--|--|--|--|--|--|--|--|--|--|--|--|--|--|--|--|--|--|--|--|--|--|--|--|--|--|--|--|--|--|--|--|--|--|--|--|--|--|--|--|--|--|--|--|--|--|--|--|--|--|--|--|--|--|--|--|--|--|--|--|--|--|--|--|--|--|--|--|--|--|--|--|--|--|--|--|--|--|--|--|--|--|--|--|--|--|--|--|--|--|--|--|--|--|--|--|--|--|--|--|--|--|--|--|--|--|--|--|--|--|--|--|--|--|--|--|--|--|--|--|--|--|--|--|--|--|--|--|--|--|--|--|--|--|--|--|--|--|--|--|--|--|--|--|--|--|--|--|--|--|--|--|--|--|--|--|--|--|--|--|--|--|--|--|--|--|--|--|--|--|--|--|--|--|--|--|--|--|--|--|--|--|--|--|--|--|--|--|--|--|--|--|--|--|--|--|--|--|--|--|--|--|--|--|--|--|--|--|--|--|--|--|--|--|--|--|--|--|--|--|--|--|--|--|--|--|--|--|--|--|--|--|--|--|--|--|--|--|--|--|--|--|--|--|--|--|--|--|--|--|--|--|--|--|--|--|--|--|--|--|--|--|--|--|--|--|--|--|--|--|--|--|--|--|--|--|--|--|--|--|--|--|--|--|--|--|--|--|--|--|--|--|--|--|--|--|--|--|--|--|--|--|--|--|--|--|--|--|--|--|--|--|--|--|--|--|--|--|--|--|--|--|--|--|--|--|--|--|--|--|--|--|--|--|--|--|--|--|--|--|--|--|--|--|--|--|--|--|--|--|--|--|--|--|--|--|--|--|--|--|--|--|--|--|--|--|--|--|--|--|--|--|--|--|--|--|--|--|--|--|--|--|--|--|--|--|--|--|--|--|--|--|--|--|--|--|--|--|--|--|--|--|--|--|--|--|--|--|--|--|--|--|--|--|--|--|



|                                                        |               |      |      |          |     |         |      |         |      |        |     |      |        |      |        |      |         |       |       |     |             |
|--------------------------------------------------------|---------------|------|------|----------|-----|---------|------|---------|------|--------|-----|------|--------|------|--------|------|---------|-------|-------|-----|-------------|
| 119                                                    | Y-99 Spot 127 | 110  | 153  | 24994    | 1.4 | 14.4978 | 1.0  | 1.4068  | 1.6  | 0.1480 | 1.2 | 0.77 | 889.7  | 10.2 | 891.8  | 9.5  | 897.1   | 20.9  | 891   | 18  | -0.83093015 |
| 120                                                    | Y-99 Spot 128 | 146  | 203  | 16598    | 1.4 | 16.5954 | 1.1  | 0.8513  | 1.7  | 0.1025 | 1.3 | 0.76 | 629.1  | 7.7  | 625.4  | 7.9  | 611.9   | 23.6  | 627   | 15  | 2.814811628 |
| 121                                                    | Y-99 Spot 129 | 30   | 136  | 47668    | 4.6 | 5.3571  | 1.7  | 11.8035 | 4.9  | 0.4588 | 4.6 | 0.94 | 2434.3 | 92.5 | 2588.9 | 45.5 | 2712.3  | 27.6  | 2692  | 49  | -10.2500461 |
| 122                                                    | Y-99 Spot 130 | 115  | 398  | 31578    | 3.5 | 17.0445 | 1.1  | 0.7885  | 1.6  | 0.0975 | 1.2 | 0.74 | 599.8  | 6.6  | 590.3  | 7.0  | 553.9   | 23.2  | 596   | 13  | 8.286559408 |
| Chiron Basin                                           |               |      |      |          |     |         |      |         |      |        |     |      |        |      |        |      |         |       |       |     |             |
| Sample Y-98: a sandstone of the Khara-Shibir Formation |               |      |      |          |     |         |      |         |      |        |     |      |        |      |        |      |         |       |       |     |             |
| 1                                                      | Y-98 Spot 1   | 170  | 425  | 72554    | 2.5 | 18.3448 | 0.8  | 0.4630  | 1.4  | 0.0616 | 1.1 | 0.80 | 385.5  | 4.1  | 386.3  | 4.4  | 391.2   | 18.3  | 385.8 | 8   | -1.46784921 |
| 2                                                      | Y-98 Spot 2   | 116  | 182  | 151337   | 1.6 | 18.7056 | 1.1  | 0.4094  | 1.7  | 0.0556 | 1.2 | 0.74 | 348.6  | 4.2  | 348.5  | 4.9  | 347.4   | 25.2  | 348.6 | 8.3 | 0.367084069 |
| 3                                                      | Y-98 Spot 3   | 99   | 180  | 4104     | 1.8 | 19.9122 | 1.4  | 0.3831  | 1.8  | 0.0553 | 1.2 | 0.66 | 347.3  | 4.0  | 329.3  | 5.1  | 204.2   | 31.4  |       |     |             |
| 4                                                      | Y-98 Spot 4   | 237  | 484  | 69505    | 2.0 | 18.4393 | 0.9  | 0.4595  | 1.5  | 0.0615 | 1.2 | 0.80 | 384.6  | 4.5  | 383.9  | 4.8  | 379.7   | 20.6  | 384.3 | 8.7 | 1.281459328 |
| 5                                                      | Y-98 Spot 5   | 221  | 495  | 183632   | 2.2 | 18.6953 | 0.8  | 0.4120  | 1.3  | 0.0559 | 1.1 | 0.80 | 350.5  | 3.7  | 350.3  | 4.0  | 348.6   | 18.2  | 350.5 | 7.2 | 0.542124358 |
| 6                                                      | Y-98 Spot 6   | 240  | 513  | 62909    | 2.1 | 18.9387 | 1.0  | 0.4146  | 1.8  | 0.0570 | 1.5 | 0.84 | 357.2  | 5.4  | 352.2  | 5.5  | 319.3   | 22.4  | 355   | 10  | 11.86741323 |
| 7                                                      | Y-98 Spot 7   | 94   | 199  | 137863   | 2.1 | 18.4164 | 1.1  | 0.4140  | 1.8  | 0.0553 | 1.4 | 0.80 | 347.1  | 4.9  | 351.7  | 5.4  | 382.5   | 24.4  | 348.3 | 9.6 | -9.25898948 |
| 8                                                      | Y-98 Spot 8   | 359  | 793  | 53501    | 2.2 | 18.7815 | 0.7  | 0.4127  | 1.6  | 0.0562 | 1.5 | 0.90 | 352.7  | 5.1  | 350.8  | 4.9  | 338.2   | 15.9  | 351.3 | 9.7 | 4.290286527 |
| 9                                                      | Y-98 Spot 9   | 189  | 351  | 26180    | 1.9 | 18.3733 | 1.0  | 0.4687  | 1.5  | 0.0625 | 1.1 | 0.74 | 390.7  | 4.1  | 390.3  | 4.8  | 387.7   | 22.4  | 390.6 | 8.1 | 0.766468769 |
| 10                                                     | Y-98 Spot 10  | 70   | 137  | 4556     | 2.0 | 19.0719 | 1.4  | 0.4585  | 1.9  | 0.0634 | 1.3 | 0.69 | 396.5  | 5.0  | 383.2  | 6.0  | 303.4   | 31.3  | 393.5 | 9.8 | 30.72049889 |
| 11                                                     | Y-98 Spot 11  | 77   | 164  | 9441     | 2.1 | 19.2668 | 1.2  | 0.4189  | 1.6  | 0.0586 | 1.0 | 0.66 | 366.9  | 3.7  | 355.3  | 4.7  | 280.2   | 26.8  | 364.8 | 7.2 | 30.95324187 |
| 12                                                     | Y-98 Spot 12  | 295  | 318  | 17182    | 1.1 | 18.7228 | 0.9  | 0.4446  | 1.4  | 0.0604 | 1.1 | 0.76 | 378.1  | 3.9  | 373.5  | 4.4  | 345.3   | 20.7  | 376.8 | 7.6 | 9.49009994  |
| 13                                                     | Y-98 Spot 13  | 171  | 193  | 19624    | 1.1 | 18.8670 | 1.3  | 0.4021  | 1.7  | 0.0550 | 1.2 | 0.68 | 345.4  | 4.0  | 343.2  | 5.0  | 327.9   | 28.7  | 345.1 | 7.9 | 5.33134656  |
| 14                                                     | Y-98 Spot 14  | 306  | 550  | 20593    | 1.8 | 16.9863 | 1.3  | 0.6598  | 1.9  | 0.0813 | 1.3 | 0.70 | 504.0  | 6.3  | 514.5  | 7.5  | 561.4   | 28.9  | 506   | 12  | -10.2241603 |
| 15                                                     | Y-98 Spot 15  | 219  | 869  | 8485     | 4.0 | 17.0863 | 1.7  | 0.4561  | 2.1  | 0.0565 | 1.3 | 0.59 | 354.6  | 4.4  | 381.5  | 6.8  | 548.6   | 37.8  |       |     |             |
| 16                                                     | Y-98 Spot 16  | 242  | 494  | 60231    | 2.0 | 18.9100 | 1.0  | 0.3872  | 1.7  | 0.0531 | 1.3 | 0.79 | 333.7  | 4.3  | 332.4  | 4.8  | 322.8   | 23.6  | 333.4 | 8.5 | 3.394252726 |
| 17                                                     | Y-98 Spot 17  | 746  | 636  | 38836    | 0.9 | 18.7672 | 1.0  | 0.4068  | 1.9  | 0.0554 | 1.6 | 0.83 | 347.6  | 5.3  | 346.6  | 5.5  | 340.0   | 23.8  | 347   | 10  | 2.237151019 |
| 18                                                     | Y-98 Spot 18  | 88   | 155  | 6882     | 1.8 | 17.5664 | 2.2  | 0.4181  | 2.7  | 0.0533 | 1.5 | 0.56 | 334.7  | 4.8  | 354.7  | 8.0  | 487.7   | 49.0  | 335.4 | 9.7 | -31.3772999 |
| 19                                                     | Y-98 Spot 19  | 54   | 132  | 56254    | 2.4 | 18.4174 | 1.2  | 0.4165  | 1.7  | 0.0557 | 1.2 | 0.71 | 349.1  | 4.1  | 353.5  | 5.0  | 382.4   | 26.7  | 349.8 | 8.1 | -8.68804821 |
| 20                                                     | Y-98 Spot 20  | 579  | 757  | 101760   | 1.3 | 18.6085 | 0.8  | 0.4004  | 1.5  | 0.0541 | 1.2 | 0.84 | 339.4  | 4.1  | 341.9  | 4.2  | 359.1   | 17.9  | 340.3 | 8   | -5.49515804 |
| 21                                                     | Y-98 Spot 21  | 192  | 283  | 15431    | 1.5 | 18.7243 | 1.0  | 0.4065  | 1.5  | 0.0552 | 1.2 | 0.78 | 346.6  | 4.0  | 346.4  | 4.5  | 345.1   | 21.6  | 346.5 | 7.8 | 0.423314312 |
| 22                                                     | Y-98 Spot 22  | 125  | 333  | 8040     | 2.7 | 19.1116 | 1.5  | 0.4344  | 2.1  | 0.0602 | 1.4 | 0.67 | 377.0  | 5.0  | 366.3  | 6.3  | 298.6   | 34.8  | 375   | 9.9 | 26.27319783 |
| 23                                                     | Y-98 Spot 23  | 394  | 544  | 35578    | 1.4 | 18.8173 | 0.8  | 0.4122  | 1.5  | 0.0563 | 1.2 | 0.82 | 353.0  | 4.1  | 350.5  | 4.3  | 333.9   | 18.7  | 352   | 8   | 5.722331208 |
| 24                                                     | Y-98 Spot 24  | 181  | 263  | 35575    | 1.5 | 18.7042 | 1.1  | 0.4053  | 1.8  | 0.0550 | 1.5 | 0.80 | 345.2  | 4.9  | 345.5  | 5.4  | 347.5   | 25.2  | 345.2 | 9.7 | -0.68270187 |
| 25                                                     | Y-98 Spot 25  | 144  | 260  | 30242    | 1.8 | 18.3782 | 1.0  | 0.4665  | 1.5  | 0.0622 | 1.1 | 0.74 | 389.0  | 4.2  | 388.7  | 4.9  | 387.2   | 22.9  | 388.9 | 8.3 | 0.476460504 |
| 26                                                     | Y-98 Spot 26  | 63   | 167  | 25129    | 2.7 | 18.5983 | 1.0  | 0.4205  | 1.5  | 0.0567 | 1.1 | 0.74 | 355.8  | 4.0  | 356.4  | 4.6  | 360.4   | 23.2  | 355.9 | 7.8 | -1.26661112 |
| 27                                                     | Y-98 Spot 27  | 44   | 165  | 10930083 | 3.7 | 18.3002 | 1.1  | 0.4280  | 1.5  | 0.0568 | 1.1 | 0.71 | 356.4  | 3.8  | 361.8  | 4.7  | 396.7   | 24.3  | 357.2 | 7.5 | -10.1681953 |
| 28                                                     | Y-98 Spot 28  | 229  | 425  | 144916   | 1.9 | 18.4974 | 1.1  | 0.4175  | 1.9  | 0.0560 | 1.5 | 0.80 | 351.5  | 5.2  | 354.3  | 5.6  | 372.6   | 25.3  | 352   | 10  | -5.67530608 |
| 29                                                     | Y-98 Spot 29  | 217  | 408  | 108702   | 1.9 | 18.4455 | 0.8  | 0.4376  | 1.7  | 0.0586 | 1.5 | 0.88 | 366.9  | 5.3  | 368.6  | 5.2  | 378.9   | 17.8  | 368   | 10  | -3.17658236 |
| 30                                                     | Y-98 Spot 30  | 151  | 203  | 189769   | 1.3 | 18.3550 | 0.9  | 0.4570  | 1.4  | 0.0609 | 1.1 | 0.78 | 380.8  | 4.2  | 382.1  | 4.6  | 390.0   | 20.5  | 381.2 | 8.2 | -2.34595421 |
| 31                                                     | Y-98 Spot 31  | 244  | 255  | 35996    | 1.0 | 18.3937 | 0.9  | 0.4659  | 1.4  | 0.0622 | 1.1 | 0.77 | 388.9  | 4.2  | 388.4  | 4.6  | 385.3   | 20.5  | 388.7 | 8.2 | 0.940928838 |
| 32                                                     | Y-98 Spot 32  | 189  | 359  | 45228    | 1.9 | 18.8085 | 1.0  | 0.4130  | 1.8  | 0.0564 | 1.4 | 0.82 | 353.4  | 5.0  | 351.0  | 5.2  | 335.0   | 22.9  | 352.6 | 9.7 | 5.515887718 |
| 33                                                     | Y-98 Spot 33  | 166  | 308  | 19061    | 1.9 | 18.4116 | 1.3  | 0.4298  | 1.9  | 0.0574 | 1.4 | 0.72 | 359.9  | 4.8  | 363.0  | 5.8  | 383.1   | 29.2  | 360.4 | 9.5 | -6.05297878 |
| 34                                                     | Y-98 Spot 34  | 225  | 355  | 50824    | 1.6 | 18.4989 | 0.9  | 0.4770  | 1.6  | 0.0640 | 1.3 | 0.82 | 400.0  | 4.9  | 396.0  | 5.1  | 372.4   | 20.2  | 398.3 | 9.6 | 7.408955471 |
| 35                                                     | Y-98 Spot 35  | 128  | 201  | 6881     | 1.6 | 19.2844 | 1.2  | 0.3975  | 1.8  | 0.0556 | 1.3 | 0.72 | 348.9  | 4.4  | 339.8  | 5.1  | 278.1   | 28.0  | 346.8 | 8.6 | 25.47232044 |
| 36                                                     | Y-98 Spot 36  | 63   | 97   | 44855    | 1.5 | 18.1843 | 1.3  | 0.4614  | 1.8  | 0.0609 | 1.4 | 0.73 | 381.0  | 5.0  | 385.2  | 5.9  | 410.9   | 28.1  | 381.8 | 9.9 | -7.29121914 |
| 37                                                     | Y-98 Spot 37  | 134  | 187  | 11636    | 1.4 | 18.9040 | 1.4  | 0.4075  | 1.9  | 0.0559 | 1.3 | 0.68 | 350.6  | 4.4  | 347.0  | 5.5  | 323.5   | 31.5  | 350   | 8.6 | 8.382802608 |
| 38                                                     | Y-98 Spot 38  | 127  | 220  | 22131    | 1.7 | 18.7391 | 0.9  | 0.4365  | 1.5  | 0.0594 | 1.3 | 0.81 | 371.7  | 4.5  | 367.8  | 4.7  | 343.3   | 20.2  | 370.2 | 8.8 | 8.256008756 |
| 39                                                     | Y-98 Spot 39  | 123  | 328  | 21851    | 2.7 | 18.3861 | 1.0  | 0.4229  | 1.6  | 0.0564 | 1.3 | 0.79 | 353.8  | 4.4  | 358.1  | 4.9  | 386.2   | 22.5  | 354.9 | 8.7 | -8.39086096 |
| 40                                                     | Y-98 Spot 40  | 164  | 484  | 25580    | 2.9 | 18.9953 | 0.9  | 0.4174  | 1.6  | 0.0575 | 1.3 | 0.82 | 360.6  | 4.7  | 354.2  | 4.9  | 312.5   | 21.5  | 358   | 9.1 | 15.37582752 |
| 41                                                     | Y-98 Spot 41  | 69   | 249  | 39171    | 3.6 | 18.3808 | 1.3  | 0.4156  | 1.8  | 0.0554 | 1.3 | 0.72 | 347.8  | 4.4  | 352.9  | 5.4  | 386.8   | 28.1  | 348.6 | 8.7 | -10.0928785 |
| 42                                                     | Y-98 Spot 42  | 1729 | 1172 | 548      | 0.7 | 7.1668  | 13.9 | 0.9171  | 14.0 | 0.0477 | 1.6 | 0.11 | 300.3  | 4.7  | 660.8  | 68.3 | 2220.6  | 242.9 |       |     |             |
| 43                                                     | Y-98 Spot 43  | 131  | 257  | 6525     | 2.0 | 19.3219 | 1.1  | 0.3758  | 1.5  | 0.0527 | 1.1 | 0.72 | 331.0  | 3.5  | 324.0  | 4.2  | 273.6   | 24.3  | 329.6 | 6.9 | 20.99991634 |
| 44                                                     | Y-98 Spot 44  | 122  | 229  | 6338     | 1.9 | 18.9559 | 0.9  | 0.4028  | 1.6  | 0.0554 | 1.3 | 0.83 | 347.6  | 4.4  | 343.7  | 4.6  | 317.2   | 19.8  | 346   | 8.6 | 9.58151379  |
| 45                                                     | Y-98 Spot 45  | 135  | 360  | 18499    | 2.7 | 18.6913 | 1.0  | 0.4136  | 1.6  | 0.0561 | 1.2 | 0.78 | 351.8  | 4.2  | 351.4  | 4.7  | 349.1</ |       |       |     |             |

|     |               |     |      |        |     |         |     |        |     |        |     |      |       |     |       |      |        |       |       |     |             |
|-----|---------------|-----|------|--------|-----|---------|-----|--------|-----|--------|-----|------|-------|-----|-------|------|--------|-------|-------|-----|-------------|
| 57  | Y-98 Spot 57  | 270 | 605  | 45073  | 2.2 | 18.5215 | 0.9 | 0.4157 | 1.8 | 0.0559 | 1.5 | 0.86 | 350.4 | 5.3 | 352.9 | 5.3  | 369.7  | 20.3  | 352   | 10  | -5.21576818 |
| 58  | Y-98 Spot 58  | 280 | 574  | 26572  | 2.1 | 19.0757 | 1.0 | 0.4146 | 1.5 | 0.0574 | 1.2 | 0.77 | 359.7 | 4.1 | 352.2 | 4.5  | 302.9  | 21.8  | 357.4 | 8   | 18.7474517  |
| 59  | Y-98 Spot 59  | 198 | 319  | 12063  | 1.6 | 18.9683 | 1.1 | 0.4530 | 1.7 | 0.0624 | 1.3 | 0.77 | 389.9 | 4.9 | 379.4 | 5.3  | 315.7  | 24.5  | 386.4 | 9.5 | 23.49427853 |
| 60  | Y-98 Spot 60  | 152 | 495  | 96403  | 3.3 | 18.2991 | 1.0 | 0.4598 | 1.8 | 0.0611 | 1.6 | 0.85 | 382.0 | 5.8 | 384.1 | 5.8  | 396.8  | 21.6  | 383   | 11  | -3.72872773 |
| 61  | Y-98 Spot 61  | 317 | 511  | 37330  | 1.6 | 18.8517 | 0.9 | 0.4158 | 1.7 | 0.0569 | 1.5 | 0.85 | 356.6 | 5.1 | 353.0 | 5.2  | 329.7  | 20.7  | 354.9 | 9.9 | 8.129509267 |
| 62  | Y-98 Spot 62  | 65  | 123  | 29376  | 1.9 | 18.6012 | 1.4 | 0.4440 | 1.9 | 0.0599 | 1.3 | 0.68 | 375.1 | 4.7 | 373.0 | 5.9  | 360.0  | 31.4  | 374.8 | 9.3 | 4.202147266 |
| 63  | Y-98 Spot 63  | 109 | 180  | 6654   | 1.7 | 19.1144 | 2.2 | 0.3972 | 2.6 | 0.0551 | 1.3 | 0.51 | 345.7 | 4.4 | 339.6 | 7.4  | 298.3  | 50.5  | 345.3 | 8.7 | 15.90760491 |
| 64  | Y-98 Spot 64  | 231 | 326  | 15357  | 1.4 | 18.9479 | 1.0 | 0.4257 | 1.4 | 0.0585 | 1.0 | 0.71 | 366.7 | 3.7 | 360.1 | 4.4  | 318.2  | 23.0  | 365.3 | 7.2 | 15.24185222 |
| 65  | Y-98 Spot 65  | 81  | 126  | 32902  | 1.6 | 18.2385 | 1.1 | 0.4238 | 1.7 | 0.0561 | 1.3 | 0.75 | 351.8 | 4.5 | 358.8 | 5.3  | 404.3  | 25.6  | 353.1 | 8.9 | -12.9845866 |
| 66  | Y-98 Spot 66  | 55  | 113  | 23688  | 2.1 | 18.5373 | 1.0 | 0.4161 | 1.6 | 0.0560 | 1.2 | 0.77 | 351.0 | 4.1 | 353.2 | 4.7  | 367.8  | 22.9  | 351.5 | 8.2 | -4.54824574 |
| 67  | Y-98 Spot 67  | 423 | 538  | 28935  | 1.3 | 17.7325 | 1.0 | 0.4821 | 1.6 | 0.0620 | 1.3 | 0.81 | 387.9 | 5.0 | 399.5 | 5.4  | 466.9  | 21.3  |       |     |             |
| 68  | Y-98 Spot 68  | 203 | 647  | 16772  | 3.2 | 17.9847 | 0.9 | 0.4666 | 1.7 | 0.0609 | 1.4 | 0.84 | 381.0 | 5.3 | 388.9 | 5.4  | 435.5  | 20.0  | 384   | 10  | -12.5132804 |
| 69  | Y-98 Spot 69  | 71  | 95   | 4819   | 1.3 | 19.5334 | 1.2 | 0.3958 | 1.7 | 0.0561 | 1.2 | 0.71 | 351.9 | 4.0 | 338.6 | 4.8  | 248.6  | 27.1  |       |     |             |
| 70  | Y-98 Spot 70  | 216 | 493  | 15161  | 2.3 | 19.0089 | 0.9 | 0.4113 | 1.6 | 0.0567 | 1.3 | 0.82 | 355.7 | 4.6 | 349.8 | 4.8  | 310.9  | 21.1  | 353.5 | 8.9 | 14.43178717 |
| 71  | Y-98 Spot 71  | 138 | 386  | 20107  | 2.8 | 18.7829 | 0.9 | 0.4187 | 1.5 | 0.0571 | 1.2 | 0.81 | 357.7 | 4.3 | 355.1 | 4.6  | 338.0  | 20.4  | 356.8 | 8.3 | 5.821556608 |
| 72  | Y-98 Spot 72  | 122 | 206  | 13571  | 1.7 | 18.5189 | 1.1 | 0.4272 | 1.7 | 0.0574 | 1.2 | 0.74 | 359.8 | 4.3 | 361.2 | 5.1  | 370.0  | 25.1  | 360.1 | 8.5 | -2.76250568 |
| 73  | Y-98 Spot 73  | 236 | 524  | 38467  | 2.2 | 18.4391 | 0.8 | 0.4177 | 1.4 | 0.0559 | 1.2 | 0.83 | 350.6 | 4.0 | 354.4 | 4.3  | 379.7  | 18.1  | 351.8 | 7.9 | -7.67559726 |
| 74  | Y-98 Spot 74  | 171 | 295  | 10781  | 1.7 | 18.8622 | 0.9 | 0.4202 | 1.6 | 0.0575 | 1.3 | 0.83 | 360.4 | 4.7 | 356.2 | 4.9  | 328.5  | 20.7  | 358.7 | 9.1 | 9.70982389  |
| 75  | Y-98 Spot 75  | 244 | 187  | 3618   | 0.8 | 19.5434 | 1.1 | 0.4221 | 1.5 | 0.0599 | 1.0 | 0.65 | 374.7 | 3.6 | 357.5 | 4.5  | 247.4  | 26.1  |       |     |             |
| 76  | Y-98 Spot 76  | 240 | 495  | 52489  | 2.1 | 17.5970 | 0.9 | 0.4346 | 1.6 | 0.0555 | 1.4 | 0.85 | 348.1 | 4.7 | 366.4 | 5.1  | 483.9  | 19.0  |       |     |             |
| 77  | Y-98 Spot 77  | 199 | 301  | 22648  | 1.5 | 18.4157 | 1.2 | 0.4551 | 1.8 | 0.0608 | 1.3 | 0.73 | 380.6 | 4.7 | 380.9 | 5.6  | 382.6  | 27.0  | 380.6 | 9.3 | -0.5195997  |
| 78  | Y-98 Spot 78  | 279 | 541  | 142775 | 1.9 | 18.4639 | 0.9 | 0.4161 | 1.6 | 0.0557 | 1.4 | 0.85 | 349.7 | 4.7 | 353.2 | 4.9  | 376.7  | 19.2  | 351.1 | 9.3 | -7.17177949 |
| 79  | Y-98 Spot 79  | 291 | 377  | 35394  | 1.3 | 18.5207 | 0.6 | 0.4182 | 1.5 | 0.0562 | 1.3 | 0.90 | 352.4 | 4.5 | 354.7 | 4.4  | 369.8  | 14.5  | 353.9 | 8.7 | -4.68792751 |
| 80  | Y-98 Spot 80  | 158 | 262  | 7496   | 1.7 | 18.7991 | 1.2 | 0.4423 | 1.8 | 0.0603 | 1.3 | 0.73 | 377.7 | 4.8 | 371.9 | 5.6  | 336.1  | 27.7  | 376.3 | 9.5 | 12.3650484  |
| 81  | Y-98 Spot 81  | 66  | 147  | 5434   | 2.2 | 19.9384 | 1.5 | 0.3892 | 2.0 | 0.0563 | 1.3 | 0.67 | 353.1 | 4.6 | 333.8 | 5.7  | 201.1  | 34.5  |       |     |             |
| 82  | Y-98 Spot 82  | 221 | 608  | 1559   | 2.8 | 13.3000 | 5.1 | 0.6304 | 5.3 | 0.0608 | 1.5 | 0.27 | 380.7 | 5.4 | 496.4 | 21.0 | 1072.7 | 103.3 |       |     |             |
| 83  | Y-98 Spot 83  | 187 | 269  | 7689   | 1.4 | 19.2371 | 1.8 | 0.3967 | 2.3 | 0.0554 | 1.4 | 0.61 | 347.4 | 4.8 | 339.2 | 6.7  | 283.7  | 42.1  | 346.4 | 9.5 | 22.46247702 |
| 84  | Y-98 Spot 84  | 219 | 319  | 212682 | 1.5 | 18.5287 | 1.1 | 0.4353 | 1.6 | 0.0585 | 1.1 | 0.71 | 366.6 | 4.1 | 366.9 | 4.9  | 368.8  | 25.4  | 366.7 | 8   | -0.59883948 |
| 85  | Y-98 Spot 85  | 212 | 367  | 35750  | 1.7 | 18.2663 | 0.9 | 0.4839 | 1.6 | 0.0641 | 1.3 | 0.82 | 400.7 | 5.2 | 400.8 | 5.4  | 400.8  | 20.7  | 401   | 10  | -0.02552995 |
| 86  | Y-98 Spot 86  | 115 | 114  | 5842   | 1.0 | 19.1620 | 1.3 | 0.4528 | 1.7 | 0.0630 | 1.2 | 0.70 | 393.6 | 4.6 | 379.3 | 5.5  | 292.6  | 28.6  |       |     |             |
| 87  | Y-98 Spot 87  | 68  | 132  | 14552  | 2.0 | 17.8726 | 1.2 | 0.5046 | 1.6 | 0.0654 | 1.0 | 0.65 | 408.6 | 4.2 | 414.8 | 5.5  | 449.5  | 27.0  | 409.5 | 8.2 | -9.08573484 |
| 88  | Y-98 Spot 88  | 127 | 281  | 3542   | 2.2 | 20.0165 | 4.3 | 0.3892 | 4.5 | 0.0565 | 1.2 | 0.26 | 354.5 | 4.0 | 333.8 | 12.8 | 192.1  | 100.9 | 354.8 | 8.1 | 84.5385385  |
| 89  | Y-98 Spot 89  | 166 | 215  | 32444  | 1.3 | 18.0624 | 0.9 | 0.4606 | 1.6 | 0.0604 | 1.3 | 0.84 | 377.8 | 4.8 | 384.7 | 5.0  | 425.9  | 19.3  | 380.3 | 9.4 | -11.2945343 |
| 90  | Y-98 Spot 90  | 246 | 938  | 99420  | 3.8 | 18.4036 | 0.9 | 0.4606 | 1.6 | 0.0615 | 1.3 | 0.82 | 384.8 | 4.8 | 384.7 | 5.1  | 384.1  | 20.5  | 384.8 | 9.4 | 0.197380937 |
| 91  | Y-98 Spot 91  | 117 | 348  | 10940  | 3.0 | 18.8386 | 1.1 | 0.4085 | 1.7 | 0.0558 | 1.3 | 0.77 | 350.3 | 4.5 | 347.8 | 5.0  | 331.4  | 24.7  | 349.6 | 8.8 | 5.704222893 |
| 92  | Y-98 Spot 92  | 249 | 450  | 31872  | 1.8 | 18.2398 | 0.9 | 0.4601 | 1.4 | 0.0609 | 1.1 | 0.80 | 381.1 | 4.2 | 384.3 | 4.5  | 404.1  | 19.2  | 382   | 8.2 | -5.70099828 |
| 93  | Y-98 Spot 93  | 70  | 138  | 25943  | 2.0 | 18.8119 | 1.2 | 0.4100 | 1.8 | 0.0560 | 1.3 | 0.74 | 351.0 | 4.5 | 348.8 | 5.2  | 334.5  | 27.2  | 350.5 | 8.8 | 4.914250528 |
| 94  | Y-98 Spot 94  | 240 | 339  | 12906  | 1.4 | 18.7003 | 1.0 | 0.4079 | 1.6 | 0.0553 | 1.3 | 0.80 | 347.2 | 4.3 | 347.3 | 4.7  | 348.0  | 21.7  | 347.3 | 8.5 | -0.22837126 |
| 95  | Y-98 Spot 95  | 132 | 204  | 27110  | 1.6 | 18.6282 | 1.1 | 0.4712 | 1.5 | 0.0637 | 1.1 | 0.72 | 398.0 | 4.3 | 392.0 | 5.0  | 356.7  | 24.2  | 396.6 | 8.5 | 11.57503063 |
| 96  | Y-98 Spot 96  | 89  | 228  | 22578  | 2.6 | 17.5076 | 1.4 | 0.4454 | 1.9 | 0.0566 | 1.3 | 0.67 | 354.8 | 4.4 | 374.1 | 5.9  | 495.2  | 30.8  |       |     |             |
| 97  | Y-98 Spot 97  | 333 | 1258 | 140931 | 3.8 | 18.3437 | 0.8 | 0.4321 | 1.5 | 0.0575 | 1.2 | 0.84 | 360.5 | 4.3 | 364.7 | 4.5  | 391.4  | 18.1  | 362   | 8.5 | -7.88515987 |
| 98  | Y-98 Spot 98  | 143 | 267  | 23971  | 1.9 | 18.4701 | 1.0 | 0.4500 | 1.6 | 0.0603 | 1.2 | 0.77 | 377.5 | 4.4 | 377.3 | 5.0  | 375.9  | 22.7  | 377.4 | 8.7 | 0.40846048  |
| 99  | Y-98 Spot 99  | 94  | 151  | 5627   | 1.6 | 19.0816 | 1.3 | 0.4099 | 1.7 | 0.0568 | 1.1 | 0.66 | 355.9 | 3.9 | 348.8 | 5.0  | 302.2  | 28.9  | 354.7 | 7.7 | 17.77392019 |
| 100 | Y-98 Spot 100 | 51  | 131  | 7134   | 2.6 | 19.3307 | 1.5 | 0.4092 | 1.9 | 0.0574 | 1.1 | 0.60 | 359.7 | 4.0 | 348.3 | 5.6  | 272.5  | 34.9  | 358.2 | 7.9 | 32.00296858 |
| 101 | Y-98 Spot 101 | 252 | 557  | 30966  | 2.2 | 18.4717 | 0.8 | 0.4204 | 1.7 | 0.0564 | 1.5 | 0.89 | 353.4 | 5.1 | 356.4 | 5.0  | 375.7  | 17.0  | 355.2 | 9.9 | -5.94538924 |
| 102 | Y-98 Spot 102 | 153 | 306  | 5912   | 2.0 | 19.3786 | 1.0 | 0.3923 | 1.7 | 0.0552 | 1.4 | 0.80 | 346.2 | 4.6 | 336.1 | 5.0  | 266.9  | 24.0  | 342.5 | 9   | 29.71142269 |
| 103 | Y-98 Spot 103 | 152 | 350  | 25627  | 2.3 | 18.7362 | 0.9 | 0.4172 | 1.5 | 0.0567 | 1.2 | 0.82 | 355.6 | 4.3 | 354.1 | 4.5  | 343.7  | 19.3  | 355.1 | 8.4 | 3.48554072  |
| 104 | Y-98 Spot 104 | 225 | 501  | 97817  | 2.2 | 18.5349 | 0.9 | 0.4176 | 1.6 | 0.0562 | 1.4 | 0.84 | 352.2 | 4.7 | 354.3 | 4.9  | 368.1  | 20.0  | 353   | 9.1 | -4.29772837 |
| 105 | Y-98 Spot 105 | 98  | 146  | 84132  | 1.5 | 18.7135 | 1.0 | 0.4410 | 1.6 | 0.0599 | 1.2 | 0.77 | 374.9 | 4.5 | 371.0 | 5.0  | 346.4  | 22.9  | 373.8 | 8.8 | 8.229282787 |
| 106 | Y-98 Spot 106 | 56  | 163  | 6323   | 2.9 | 19.1982 | 1.0 | 0.4112 | 1.8 | 0.0573 | 1.4 | 0.81 | 359.1 | 5.0 | 349.7 | 5.2  | 288.3  | 23.7  | 355.3 | 9.7 | 24.56101051 |
| 107 | Y-98 Spot 107 | 96  | 214  | 4205   | 2.2 | 17.8340 | 2.1 | 0.4498 | 2.5 | 0.0582 | 1.3 | 0.53 | 364.7 | 4.7 | 377.1 | 7.9  | 454.3  | 47.1  | 365.3 | 9.4 | -19.7226588 |
| 108 | Y-98 Spot 108 | 175 | 323  | 39595  | 1.8 | 18.4301 | 1.0 | 0.4153 | 1.6 | 0.0555 | 1.3 | 0.79 | 348.4 | 4.3 | 352.7 | 4.8  | 380.8  | 22.0  | 349.5 | 8.5 | -8.50541502 |
| 109 | Y-98 Spot 109 | 907 | 1307 | 28640  | 1.4 | 17.8036 | 1.0 | 0.4679 | 1.6 | 0.0604 | 1.3 | 0.79 | 378.3 | 4.7 | 389.7 | 5.2  | 458.1  | 21.7  |       |     |             |
| 110 | Y-98 Spot 110 | 109 | 240  | 13069  | 2.2 | 18.6782 | 1.1 | 0.4511 | 1.6 | 0.0611 | 1.3 | 0.77 | 382.5 | 4.7 | 378.1 | 5.2  | 350.7  | 23.8  | 381.2 | 9.2 | 9.080690116 |
| 111 | Y-98 Spot 111 | 199 | 377  | 37475  | 1.9 | 18.2232 | 1.0 | 0.4655 | 1.4 | 0.0615 | 0.9 | 0.69 | 385.0 | 3.5 | 388.1 | 4.5  | 406.1  | 22.5  | 385.5 | 7   | -5.1984512  |
| 112 | Y-98 Spot 112 | 104 | 161  | 31971  | 1.5 | 16.6350 | 1.4 | 0.5083 | 1.8 | 0.0614 | 1.1 | 0.62 | 383.8 | 4.2 | 417.3 | 6.2  | 606.7  | 30.6  |       |     |             |
| 113 | Y-98 Spot 113 | 123 | 285  | 6453   | 2.3 | 19.0978 | 2.3 | 0.4144 | 2.7 | 0.0574 | 1.4 | 0.52 | 359.9 | 4.8 | 352.0 | 7.9  | 300.3  | 52.1  | 359.3 | 9.6 | 19.86210358 |
| 114 | Y-98 Spot 114 | 237 | 648  | 227872 | 2.7 | 18.2801 | 1.1 | 0.4592 | 1.9 | 0.0609 | 1.5 | 0.82 | 381.2 | 5.6 | 383.7 | 5.9  | 399.2  | 24.0  | 382   | 11  | -4.50655091 |
| 115 | Y-98 Spot 115 | 89  | 194  | 483505 | 2.2 | 18.6473 |     |        |     |        |     |      |       |     |       |      |        |       |       |     |             |

|                                                              |               |     |      |         |      |         |     |         |     |        |     |      |        |      |        |      |        |      |       |     |             |
|--------------------------------------------------------------|---------------|-----|------|---------|------|---------|-----|---------|-----|--------|-----|------|--------|------|--------|------|--------|------|-------|-----|-------------|
| 119                                                          | Y-98 Spot 119 | 262 | 668  | 27186   | 2.6  | 18.8159 | 0.8 | 0.4251  | 1.4 | 0.0580 | 1.2 | 0.84 | 363.6  | 4.2  | 359.7  | 4.2  | 334.1  | 17.3 | 361.9 | 8   | 8.844514001 |
| 120                                                          | Y-98 Spot 120 | 302 | 495  | 90098   | 1.6  | 18.7633 | 0.9 | 0.3981  | 1.7 | 0.0542 | 1.5 | 0.85 | 340.2  | 4.9  | 340.3  | 5.0  | 340.4  | 20.3 | 340.2 | 9.5 | -0.05762863 |
| 121                                                          | Y-98 Spot 121 | 220 | 190  | 218407  | 0.9  | 18.1699 | 0.9 | 0.4700  | 1.7 | 0.0620 | 1.4 | 0.84 | 387.6  | 5.2  | 391.2  | 5.4  | 412.7  | 20.4 | 389   | 10  | -6.0903373  |
| 122                                                          | Y-98 Spot 122 | 71  | 157  | 7807    | 2.2  | 18.7632 | 1.4 | 0.4705  | 2.0 | 0.0641 | 1.4 | 0.71 | 400.2  | 5.4  | 391.5  | 6.4  | 340.4  | 31.7 | 398   | 11  | 17.56324879 |
| 123                                                          | Y-98 Spot 123 | 147 | 394  | 5463    | 2.7  | 15.5605 | 3.5 | 0.5087  | 3.9 | 0.0574 | 1.6 | 0.42 | 360.0  | 5.7  | 417.6  | 13.3 | 749.4  | 74.4 |       |     |             |
| 124                                                          | Y-98 Spot 124 | 23  | 78   | 20263   | 3.3  | 18.3628 | 1.5 | 0.4616  | 2.4 | 0.0615 | 1.9 | 0.77 | 384.8  | 6.9  | 385.4  | 7.7  | 389.0  | 34.4 | 385   | 14  | -1.10001699 |
| 125                                                          | Y-98 Spot 125 | 50  | 115  | 20625   | 2.3  | 18.5046 | 1.2 | 0.4194  | 1.7 | 0.0563 | 1.3 | 0.73 | 353.2  | 4.3  | 355.7  | 5.2  | 371.7  | 26.7 | 353.6 | 8.6 | -4.98998475 |
| 126                                                          | Y-98 Spot 126 | 108 | 164  | 27306   | 1.5  | 18.4762 | 1.4 | 0.4265  | 1.8 | 0.0572 | 1.1 | 0.62 | 358.4  | 3.9  | 360.7  | 5.6  | 375.2  | 32.6 | 358.6 | 7.8 | -4.47776498 |
| 127                                                          | Y-98 Spot 127 | 116 | 242  | 37346   | 2.1  | 18.7014 | 1.0 | 0.3961  | 1.5 | 0.0537 | 1.2 | 0.78 | 337.5  | 3.9  | 338.8  | 4.4  | 347.9  | 21.6 | 337.8 | 7.8 | -2.98478731 |
| 128                                                          | Y-98 Spot 128 | 116 | 303  | 33103   | 2.6  | 18.7104 | 1.0 | 0.4354  | 1.5 | 0.0591 | 1.2 | 0.77 | 370.2  | 4.2  | 367.0  | 4.6  | 346.8  | 21.7 | 369.3 | 8.2 | 6.736153267 |
| 129                                                          | Y-98 Spot 129 | 216 | 334  | 14212   | 1.5  | 18.6066 | 1.0 | 0.4580  | 1.6 | 0.0618 | 1.3 | 0.78 | 386.8  | 4.7  | 382.9  | 5.1  | 359.4  | 22.5 | 385.5 | 9.2 | 7.633143984 |
| 130                                                          | Y-98 Spot 130 | 130 | 138  | 6240    | 1.1  | 19.0371 | 1.3 | 0.3922  | 2.1 | 0.0542 | 1.6 | 0.78 | 340.1  | 5.4  | 336.0  | 6.0  | 307.5  | 30.3 | 339   | 11  | 10.61103787 |
| <i>Sample Y-97: a sandstone of the Shazogaitui Formation</i> |               |     |      |         |      |         |     |         |     |        |     |      |        |      |        |      |        |      |       |     |             |
| 1                                                            | Y-97 Spot 2   | 12  | 50   | 46752   | 4.0  | 5.9595  | 1.2 | 10.4667 | 2.2 | 0.4526 | 1.8 | 0.84 | 2406.8 | 36.6 | 2477.0 | 20.2 | 2535.1 | 20.1 | 2506  | 35  | -5.06122027 |
| 2                                                            | Y-97 Spot 3   | 624 | 906  | 55030   | 1.5  | 17.7750 | 0.8 | 0.4227  | 1.6 | 0.0545 | 1.3 | 0.85 | 342.2  | 4.5  | 358.0  | 4.8  | 461.6  | 18.7 |       |     |             |
| 3                                                            | Y-97 Spot 4   | 374 | 1400 | 176153  | 3.7  | 6.7870  | 1.3 | 6.9328  | 2.4 | 0.3414 | 2.1 | 0.85 | 1893.4 | 33.8 | 2102.9 | 21.5 | 2314.5 | 22.1 |       |     |             |
| 4                                                            | Y-97 Spot 5   | 115 | 281  | 130140  | 2.4  | 8.5531  | 0.8 | 5.4246  | 1.4 | 0.3367 | 1.2 | 0.83 | 1870.5 | 19.0 | 1888.8 | 12.1 | 1908.8 | 14.3 | 1895  | 23  | -2.00568663 |
| 5                                                            | Y-97 Spot 6   | 119 | 545  | 135454  | 4.6  | 7.9988  | 0.7 | 6.1982  | 1.3 | 0.3597 | 1.0 | 0.81 | 1980.9 | 17.7 | 2004.2 | 11.2 | 2028.3 | 13.2 | 2011  | 21  | -2.33444357 |
| 6                                                            | Y-97 Spot 7   | 367 | 559  | 3943    | 1.5  | 5.4406  | 2.3 | 11.5384 | 2.6 | 0.4555 | 1.2 | 0.45 | 2419.6 | 24.0 | 2567.7 | 24.5 | 2686.8 | 38.6 |       |     |             |
| 7                                                            | Y-97 Spot 8   | 58  | 165  | 2100077 | 2.9  | 4.7679  | 0.7 | 16.3029 | 1.2 | 0.5640 | 0.9 | 0.78 | 2883.1 | 21.3 | 2894.7 | 11.3 | 2902.8 | 12.0 | 2898  | 22  | -0.67626493 |
| 8                                                            | Y-97 Spot 9   | 255 | 669  | 68583   | 2.6  | 8.1290  | 0.8 | 5.4598  | 1.5 | 0.3220 | 1.2 | 0.83 | 1799.6 | 19.2 | 1894.3 | 12.7 | 1999.6 | 14.8 |       |     |             |
| 9                                                            | Y-97 Spot 10  | 160 | 266  | 65613   | 1.7  | 17.7619 | 0.8 | 0.4596  | 1.5 | 0.0592 | 1.3 | 0.84 | 370.9  | 4.6  | 383.9  | 4.9  | 463.3  | 18.7 |       |     |             |
| 10                                                           | Y-97 Spot 11  | 87  | 106  | 42224   | 1.2  | 8.7501  | 0.9 | 5.2396  | 1.4 | 0.3327 | 1.1 | 0.77 | 1851.2 | 17.1 | 1859.1 | 11.7 | 1867.8 | 15.8 | 1860  | 23  | -0.88741553 |
| 11                                                           | Y-97 Spot 12  | 450 | 1232 | 230022  | 2.7  | 8.3091  | 0.8 | 5.7093  | 1.3 | 0.3442 | 1.0 | 0.78 | 1906.9 | 16.6 | 1932.8 | 11.1 | 1960.6 | 14.4 | 1937  | 22  | -2.74104941 |
| 12                                                           | Y-97 Spot 13  | 161 | 371  | 6895437 | 2.3  | 8.4018  | 0.8 | 5.8841  | 1.3 | 0.3587 | 1.1 | 0.81 | 1976.1 | 18.6 | 1958.9 | 11.7 | 1940.8 | 14.0 | 1954  | 23  | 1.817011515 |
| 13                                                           | Y-97 Spot 14  | 35  | 665  | 235828  | 19.2 | 8.4713  | 0.8 | 5.5733  | 1.3 | 0.3426 | 1.0 | 0.80 | 1899.0 | 16.8 | 1912.0 | 11.0 | 1926.1 | 13.9 | 1915  | 22  | -1.40279698 |
| 14                                                           | Y-97 Spot 15  | 268 | 770  | 133134  | 2.9  | 7.8376  | 0.9 | 6.6859  | 1.6 | 0.3802 | 1.3 | 0.82 | 2077.3 | 23.8 | 2070.8 | 14.4 | 2064.3 | 16.4 | 2069  | 27  | 0.632013754 |
| 15                                                           | Y-97 Spot 16  | 372 | 552  | 62508   | 1.5  | 18.7677 | 0.9 | 0.4004  | 1.5 | 0.0545 | 1.1 | 0.78 | 342.2  | 3.8  | 341.9  | 4.3  | 339.9  | 20.8 | 342.1 | 7.5 | 0.678150865 |
| 16                                                           | Y-97 Spot 17  | 256 | 303  | 494096  | 1.2  | 8.5040  | 0.8 | 5.5115  | 1.4 | 0.3401 | 1.1 | 0.82 | 1887.0 | 18.3 | 1902.4 | 11.7 | 1919.2 | 13.8 | 1907  | 22  | -1.67278086 |
| 17                                                           | Y-97 Spot 18  | 85  | 829  | 62177   | 9.7  | 7.9549  | 0.7 | 5.8511  | 1.3 | 0.3377 | 1.1 | 0.83 | 1875.7 | 18.0 | 1954.0 | 11.5 | 2038.0 | 13.0 |       |     |             |
| 18                                                           | Y-97 Spot 19  | 122 | 436  | 256615  | 3.6  | 6.5620  | 0.8 | 8.8424  | 1.3 | 0.4210 | 1.0 | 0.81 | 2265.1 | 19.9 | 2321.9 | 11.7 | 2372.2 | 12.8 |       |     |             |
| 19                                                           | Y-97 Spot 20  | 613 | 1502 | 40690   | 2.5  | 7.2935  | 0.9 | 6.3778  | 1.7 | 0.3375 | 1.5 | 0.86 | 1874.7 | 23.8 | 2029.2 | 15.0 | 2190.2 | 15.2 |       |     |             |
| 20                                                           | Y-97 Spot 21  | 125 | 119  | 469244  | 1.0  | 8.6251  | 1.0 | 5.3564  | 1.5 | 0.3352 | 1.1 | 0.77 | 1863.6 | 18.3 | 1877.9 | 12.7 | 1893.7 | 17.1 | 1879  | 25  | -1.59116849 |
| 21                                                           | Y-97 Spot 22  | 195 | 640  | 265803  | 3.3  | 8.4756  | 0.8 | 5.6068  | 1.3 | 0.3448 | 1.0 | 0.81 | 1909.7 | 16.9 | 1917.1 | 10.9 | 1925.2 | 13.5 | 1919  | 21  | -0.80150086 |
| 22                                                           | Y-97 Spot 23  | 577 | 1430 | 34457   | 2.5  | 8.5364  | 1.0 | 4.4366  | 1.9 | 0.2748 | 1.6 | 0.84 | 1565.1 | 21.9 | 1719.2 | 15.5 | 1912.3 | 18.1 |       |     |             |
| 23                                                           | Y-97 Spot 24  | 121 | 574  | 237855  | 4.7  | 7.9870  | 0.9 | 5.8746  | 1.5 | 0.3404 | 1.3 | 0.82 | 1888.8 | 20.7 | 1957.5 | 13.4 | 2030.9 | 15.7 |       |     |             |
| 24                                                           | Y-97 Spot 25  | 498 | 1299 | 802185  | 2.6  | 8.4189  | 0.7 | 5.7818  | 1.4 | 0.3532 | 1.3 | 0.89 | 1949.8 | 21.6 | 1943.7 | 12.5 | 1937.2 | 11.9 | 1940  | 21  | 0.651979978 |
| 25                                                           | Y-97 Spot 26  | 173 | 737  | 2817117 | 4.3  | 8.5961  | 0.8 | 5.1983  | 1.3 | 0.3242 | 1.1 | 0.80 | 1810.3 | 17.1 | 1852.3 | 11.5 | 1899.8 | 14.5 |       |     |             |
| 26                                                           | Y-97 Spot 27  | 40  | 481  | 4087384 | 12.1 | 8.4821  | 0.8 | 5.6016  | 1.9 | 0.3447 | 1.7 | 0.92 | 1909.5 | 28.7 | 1916.3 | 16.3 | 1923.8 | 13.6 | 1921  | 25  | -0.74353473 |
| 27                                                           | Y-97 Spot 28  | 62  | 92   | 25200   | 1.5  | 18.4254 | 1.3 | 0.4588  | 1.8 | 0.0613 | 1.3 | 0.71 | 383.7  | 4.7  | 383.4  | 5.7  | 381.4  | 28.2 | 383.7 | 9.3 | 0.619150174 |
| 28                                                           | Y-97 Spot 30  | 51  | 704  | 310934  | 13.9 | 6.3410  | 0.7 | 9.8395  | 1.3 | 0.4527 | 1.1 | 0.83 | 2407.3 | 22.3 | 2419.9 | 12.3 | 2430.4 | 12.5 | 2425  | 22  | -0.95179948 |
| 29                                                           | Y-97 Spot 31  | 190 | 310  | 806756  | 1.6  | 18.3433 | 1.2 | 0.4441  | 1.7 | 0.0591 | 1.2 | 0.68 | 370.2  | 4.2  | 373.1  | 5.3  | 391.4  | 27.9 | 370.6 | 8.2 | -5.42605872 |
| 30                                                           | Y-97 Spot 32  | 331 | 360  | 33557   | 1.1  | 18.2931 | 0.8 | 0.4642  | 1.3 | 0.0616 | 1.0 | 0.77 | 385.4  | 3.6  | 387.2  | 4.1  | 397.6  | 18.2 | 385.9 | 7.1 | -3.05532885 |
| 31                                                           | Y-97 Spot 33  | 314 | 797  | 578006  | 2.5  | 8.7319  | 0.6 | 5.2052  | 1.5 | 0.3298 | 1.4 | 0.91 | 1837.4 | 22.3 | 1853.5 | 13.1 | 1871.6 | 11.6 | 1864  | 21  | -1.82961625 |
| 32                                                           | Y-97 Spot 34  | 221 | 481  | 154196  | 2.2  | 8.1842  | 0.9 | 5.9061  | 1.5 | 0.3507 | 1.2 | 0.81 | 1938.0 | 20.5 | 1962.1 | 13.1 | 1987.6 | 15.8 | 1969  | 25  | -2.49411554 |
| 33                                                           | Y-97 Spot 36  | 59  | 90   | 39760   | 1.5  | 8.8350  | 0.9 | 5.1348  | 1.5 | 0.3292 | 1.2 | 0.81 | 1834.4 | 19.3 | 1841.9 | 12.7 | 1850.4 | 16.0 | 1844  | 25  | -0.8654049  |
| 34                                                           | Y-97 Spot 37  | 100 | 113  | 148081  | 1.1  | 9.9144  | 0.7 | 5.1421  | 1.4 | 0.3326 | 1.2 | 0.86 | 1851.0 | 19.8 | 1843.1 | 12.1 | 1834.2 | 13.0 | 1839  | 22  | 0.913546925 |
| 35                                                           | Y-97 Spot 38  | 58  | 793  | 340347  | 13.7 | 8.4869  | 0.8 | 5.5719  | 1.4 | 0.3431 | 1.1 | 0.83 | 1901.6 | 18.7 | 1911.8 | 11.8 | 1922.8 | 13.8 | 1915  | 23  | -1.09800567 |
| 36                                                           | Y-97 Spot 39  | 440 | 695  | 213256  | 1.6  | 18.6647 | 0.8 | 0.3943  | 1.2 | 0.0534 | 1.0 | 0.79 | 335.3  | 3.2  | 337.5  | 3.6  | 352.4  | 17.2 | 335.9 | 6.3 | -4.82649921 |
| 37                                                           | Y-97 Spot 40  | 365 | 674  | 312558  | 1.8  | 8.3738  | 0.8 | 5.7038  | 1.6 | 0.3466 | 1.4 | 0.86 | 1918.1 | 23.1 | 1931.9 | 14.0 | 1946.8 | 14.7 | 1938  | 25  | -1.47222832 |
| 38                                                           | Y-97 Spot 41  | 189 | 497  | 587935  | 2.6  | 6.4398  | 0.8 | 9.1779  | 1.5 | 0.4288 | 1.3 | 0.87 | 2300.5 | 25.9 | 2355.9 | 14.1 | 2404.2 | 12.9 |       |     |             |
| 39                                                           | Y-97 Spot 42  | 269 | 283  | 115215  | 1.0  | 8.5373  | 0.9 | 5.5353  | 1.6 | 0.3429 | 1.4 | 0.84 | 1900.5 | 22.7 | 1906.1 | 14.1 | 1912.1 | 16.1 | 1908  | 27  | -0.60781579 |
| 40                                                           | Y-97 Spot 43  | 176 | 229  | 72271   | 1.3  | 14.6311 | 1.0 | 1.3702  | 1.9 | 0.1455 | 1.6 | 0.86 | 875.5  | 13.2 | 876.3  | 11.0 | 878.2  | 19.7 | 876   | 22  | -0.30651507 |
| 41                                                           | Y-97 Spot 44  | 344 | 897  | 170073  | 2.6  | 7.1416  | 0.7 | 6.7799  | 1.6 | 0.3513 | 1.4 | 0.89 | 1940.9 | 23.2 | 2083.1 | 13.7 | 2226.7 | 12.1 |       |     |             |
| 42                                                           | Y-97 Spot 45  | 90  | 112  | 75310   | 1.2  | 8.7934  | 0.9 | 5.4762  | 1.5 | 0.3494 | 1.2 | 0.80 | 1931.7 | 20.1 | 1896.9 | 13.0 | 1858.9 | 16.4 | 1888  | 26  | 3.918181119 |
| 43                                                           | Y-97 Spot 46  | 142 | 136  | 60610   | 1.0  | 8.7249  | 0.7 | 5.4476  | 1.2 | 0.3449 | 1.1 | 0.84 | 1910.0 | 17.4 | 1892.4 | 10.7 | 1873.0 | 12.0 | 1886  | 20  | 1.974985816 |
| 44                                                           | Y-97 Spot 47  | 70  | 773  | 201396  | 11.1 | 6.7992  | 0.8 | 7.5483  | 1.8 | 0.3724 | 1.6 | 0.91 | 2040.6 | 28.8 | 2178.7 | 16.3 | 2311.4 | 13.0 |       |     |             |
| 45                                                           | Y-97 Spot 49  | 114 | 214  | 28919   | 1.9  | 18.5797 | 1.0 | 0.4425  | 1.6 | 0.0597 | 1.2 | 0.79 | 373.6  | 4.5  | 372.0  | 4.9  | 362.6  | 22.1 | 373.1 | 8.9 | 3.0152216   |
| 46                                                           | Y-97 Spot 50  | 24  | 63   | 75449   | 2.6  |         |     |         |     |        |     |      |        |      |        |      |        |      |       |     |             |

|     |               |     |      |         |      |         |     |         |     |        |     |      |        |      |        |      |        |      |       |     |             |
|-----|---------------|-----|------|---------|------|---------|-----|---------|-----|--------|-----|------|--------|------|--------|------|--------|------|-------|-----|-------------|
| 50  | Y-97 Spot 54  | 96  | 168  | 92117   | 1.8  | 6.3417  | 0.8 | 9.7533  | 2.4 | 0.4488 | 2.3 | 0.95 | 2389.9 | 46.1 | 2411.8 | 22.4 | 2430.3 | 12.9 | 2427  | 25  | -1.66169136 |
| 51  | Y-97 Spot 55  | 39  | 178  | 2675621 | 4.6  | 15.0095 | 1.0 | 1.1737  | 1.5 | 0.1278 | 1.2 | 0.76 | 775.5  | 8.4  | 788.4  | 8.3  | 825.2  | 20.3 | 782   | 16  | -6.02335533 |
| 52  | Y-97 Spot 56  | 182 | 367  | 26883   | 2.0  | 18.0196 | 1.3 | 0.5030  | 2.7 | 0.0658 | 2.3 | 0.87 | 410.6  | 9.2  | 413.7  | 9.1  | 431.2  | 29.3 | 412   | 18  | -4.79295145 |
| 53  | Y-97 Spot 57  | 287 | 419  | 516660  | 1.5  | 6.0411  | 0.8 | 10.6330 | 1.7 | 0.4661 | 1.6 | 0.90 | 2466.3 | 32.0 | 2491.6 | 16.1 | 2512.2 | 12.7 | 2506  | 24  | -1.82702255 |
| 54  | Y-97 Spot 59  | 133 | 292  | 145743  | 2.2  | 8.7765  | 0.8 | 5.4599  | 1.5 | 0.3477 | 1.3 | 0.85 | 1923.6 | 21.3 | 1894.3 | 12.9 | 1862.4 | 14.3 | 1882  | 24  | 3.284389827 |
| 55  | Y-97 Spot 60  | 221 | 382  | 69460   | 1.7  | 18.5956 | 0.9 | 0.3874  | 1.5 | 0.0523 | 1.2 | 0.80 | 328.5  | 3.9  | 332.5  | 4.3  | 360.7  | 20.8 | 329.4 | 7.7 | -8.92876694 |
| 56  | Y-97 Spot 61  | 73  | 139  | 85541   | 1.9  | 8.8626  | 1.0 | 5.2465  | 1.8 | 0.3374 | 1.5 | 0.84 | 1874.1 | 25.2 | 1860.2 | 15.6 | 1844.8 | 17.8 | 1855  | 29  | 1.588449013 |
| 57  | Y-97 Spot 62  | 96  | 601  | 837151  | 6.3  | 8.4632  | 0.7 | 5.5662  | 1.5 | 0.3418 | 1.3 | 0.88 | 1895.4 | 22.2 | 1910.9 | 13.2 | 1927.8 | 13.2 | 1919  | 23  | -1.68185581 |
| 58  | Y-97 Spot 65  | 452 | 340  | 11377   | 0.8  | 16.4284 | 0.9 | 0.5114  | 1.5 | 0.0610 | 1.2 | 0.78 | 381.4  | 4.4  | 419.4  | 5.3  | 633.7  | 20.4 |       |     |             |
| 59  | Y-97 Spot 66  | 81  | 1153 | 376448  | 14.2 | 7.9985  | 0.8 | 5.9913  | 1.2 | 0.3477 | 0.9 | 0.76 | 1923.7 | 15.4 | 1974.6 | 10.5 | 2028.4 | 13.8 |       |     |             |
| 60  | Y-97 Spot 67  | 162 | 368  | 24960   | 2.3  | 18.7274 | 0.8 | 0.4483  | 1.5 | 0.0609 | 1.2 | 0.82 | 381.2  | 4.5  | 376.1  | 4.6  | 344.7  | 18.9 | 379   | 8.7 | 10.58180115 |
| 61  | Y-97 Spot 68  | 229 | 560  | 1520294 | 2.4  | 6.5704  | 0.7 | 9.1081  | 1.7 | 0.4342 | 1.6 | 0.92 | 2324.7 | 31.1 | 2348.9 | 15.9 | 2370.0 | 11.6 | 2364  | 22  | -1.91057561 |
| 62  | Y-97 Spot 69  | 66  | 59   | 35834   | 0.9  | 19.2521 | 1.8 | 0.3695  | 2.2 | 0.0516 | 1.3 | 0.58 | 324.4  | 4.1  | 319.3  | 6.2  | 281.9  | 41.9 | 324   | 8.2 | 15.08970818 |
| 63  | Y-97 Spot 70  | 117 | 236  | 98587   | 2.0  | 8.7624  | 0.7 | 5.2368  | 1.5 | 0.3329 | 1.3 | 0.88 | 1852.7 | 21.4 | 1858.6 | 12.8 | 1865.3 | 12.8 | 1862  | 22  | -0.67710155 |
| 64  | Y-97 Spot 71  | 17  | 353  | 136709  | 20.3 | 8.8156  | 0.8 | 5.0925  | 1.2 | 0.3257 | 1.0 | 0.77 | 1817.7 | 15.1 | 1834.9 | 10.5 | 1854.4 | 14.3 | 1837  | 21  | -1.97847951 |
| 65  | Y-97 Spot 72  | 158 | 387  | 311497  | 2.4  | 8.6005  | 0.8 | 5.3399  | 1.4 | 0.3332 | 1.1 | 0.82 | 1854.0 | 18.3 | 1875.3 | 11.9 | 1898.9 | 14.4 | 1881  | 23  | -2.36270808 |
| 66  | Y-97 Spot 73  | 98  | 291  | 9147    | 3.0  | 15.1019 | 4.2 | 0.4976  | 4.3 | 0.0545 | 1.3 | 0.29 | 342.2  | 4.2  | 410.1  | 14.6 | 812.3  | 86.8 |       |     |             |
| 67  | Y-97 Spot 75  | 70  | 93   | 72773   | 1.3  | 8.8791  | 0.9 | 5.2687  | 1.5 | 0.3394 | 1.3 | 0.82 | 1884.0 | 20.4 | 1863.8 | 13.0 | 1841.4 | 15.9 | 1858  | 25  | 2.312012377 |
| 68  | Y-97 Spot 76  | 128 | 406  | 2437133 | 3.2  | 6.1840  | 0.8 | 10.1448 | 1.3 | 0.4552 | 1.0 | 0.79 | 2418.3 | 20.3 | 2448.1 | 11.7 | 2472.9 | 13.0 | 2456  | 22  | -2.20532342 |
| 69  | Y-97 Spot 77  | 56  | 125  | 321733  | 2.2  | 5.5906  | 0.7 | 12.4616 | 1.2 | 0.5055 | 1.0 | 0.82 | 2637.4 | 21.7 | 2639.8 | 11.4 | 2641.7 | 11.4 | 2641  | 21  | -0.1643842  |
| 70  | Y-97 Spot 78  | 171 | 610  | 280139  | 3.6  | 8.4266  | 0.7 | 5.6889  | 1.2 | 0.3478 | 1.0 | 0.84 | 1924.2 | 17.2 | 1929.7 | 10.6 | 1935.5 | 11.8 | 1932  | 20  | -0.58235147 |
| 71  | Y-97 Spot 79  | 35  | 86   | 106350  | 2.4  | 8.3458  | 0.8 | 6.0538  | 1.4 | 0.3666 | 1.2 | 0.83 | 2013.4 | 20.5 | 1983.6 | 12.5 | 1952.7 | 14.4 | 1973  | 24  | 3.103726736 |
| 72  | Y-97 Spot 80  | 88  | 165  | 206659  | 1.9  | 6.3570  | 0.6 | 10.4413 | 1.0 | 0.4816 | 0.7 | 0.76 | 2534.3 | 15.7 | 2474.7 | 9.1  | 2426.2 | 10.7 |       |     |             |
| 73  | Y-97 Spot 81  | 90  | 164  | 91994   | 1.8  | 6.3587  | 0.7 | 9.6591  | 1.2 | 0.4456 | 0.9 | 0.81 | 2375.9 | 18.8 | 2402.8 | 10.7 | 2425.7 | 11.4 | 2412  | 20  | -2.05442068 |
| 74  | Y-97 Spot 82  | 81  | 72   | 103076  | 0.9  | 8.6585  | 0.8 | 5.3253  | 1.4 | 0.3346 | 1.1 | 0.78 | 1860.4 | 17.2 | 1872.9 | 11.6 | 1886.8 | 15.2 | 1875  | 23  | -1.39702019 |
| 75  | Y-97 Spot 83  | 225 | 697  | 74450   | 3.1  | 6.4554  | 0.9 | 7.8432  | 1.6 | 0.3674 | 1.3 | 0.82 | 2017.0 | 22.6 | 2213.2 | 14.3 | 2400.1 | 15.4 |       |     |             |
| 76  | Y-97 Spot 84  | 35  | 302  | 601339  | 8.7  | 6.0866  | 0.7 | 10.4320 | 1.3 | 0.4607 | 1.1 | 0.85 | 2442.7 | 22.5 | 2473.9 | 12.1 | 2499.6 | 11.7 | 2487  | 21  | -2.27704277 |
| 77  | Y-97 Spot 85  | 79  | 328  | 16826   | 4.1  | 16.9538 | 0.9 | 0.5081  | 1.7 | 0.0625 | 1.4 | 0.83 | 390.8  | 5.2  | 417.1  | 5.7  | 565.6  | 20.1 |       |     |             |
| 78  | Y-97 Spot 86  | 328 | 401  | 395419  | 1.2  | 6.3674  | 0.6 | 9.6576  | 1.3 | 0.4462 | 1.1 | 0.87 | 2378.3 | 22.6 | 2402.7 | 12.0 | 2423.4 | 10.8 | 2414  | 20  | -1.86134454 |
| 79  | Y-97 Spot 87  | 106 | 157  | 361980  | 1.5  | 6.0328  | 0.7 | 11.2129 | 1.2 | 0.4908 | 1.0 | 0.81 | 2574.2 | 20.8 | 2541.0 | 11.2 | 2514.5 | 11.7 | 2530  | 21  | 2.374761925 |
| 80  | Y-97 Spot 88  | 79  | 194  | 5414800 | 2.5  | 8.7401  | 0.8 | 5.2456  | 1.5 | 0.3327 | 1.3 | 0.84 | 1851.3 | 20.4 | 1860.1 | 12.9 | 1869.9 | 14.9 | 1863  | 24  | -0.99701215 |
| 81  | Y-97 Spot 89  | 164 | 405  | 218252  | 2.5  | 8.3769  | 0.8 | 5.2973  | 1.4 | 0.3220 | 1.1 | 0.82 | 1799.4 | 17.4 | 1868.4 | 11.6 | 1946.1 | 14.0 |       |     |             |
| 82  | Y-97 Spot 90  | 380 | 715  | 63098   | 1.9  | 18.0750 | 0.7 | 0.4585  | 1.4 | 0.0601 | 1.2 | 0.87 | 376.4  | 4.3  | 383.2  | 4.3  | 424.4  | 15.1 | 379.5 | 8.3 | -11.3069694 |
| 83  | Y-97 Spot 93  | 85  | 160  | 65756   | 1.9  | 17.7909 | 1.3 | 0.4295  | 1.9 | 0.0554 | 1.4 | 0.72 | 347.9  | 4.6  | 362.8  | 5.8  | 459.6  | 29.2 |       |     |             |
| 84  | Y-97 Spot 94  | 622 | 1210 | 1222798 | 1.9  | 6.0361  | 0.7 | 11.0435 | 1.4 | 0.4837 | 1.2 | 0.87 | 2543.2 | 25.2 | 2526.8 | 12.8 | 2513.6 | 11.4 | 2519  | 22  | 1.17926089  |
| 85  | Y-97 Spot 95  | 470 | 1087 | 31522   | 2.3  | 6.2949  | 0.8 | 8.4151  | 1.3 | 0.3844 | 1.1 | 0.79 | 2096.6 | 19.1 | 2276.8 | 12.2 | 2442.8 | 13.9 |       |     |             |
| 86  | Y-97 Spot 97  | 39  | 153  | 158133  | 3.9  | 7.4629  | 0.8 | 7.1010  | 1.5 | 0.3845 | 1.3 | 0.83 | 2097.4 | 22.9 | 2124.2 | 13.6 | 2150.2 | 14.7 | 2134  | 25  | -2.458242   |
| 87  | Y-97 Spot 98  | 96  | 185  | 261547  | 1.9  | 8.5582  | 0.9 | 5.5080  | 1.5 | 0.3420 | 1.2 | 0.82 | 1896.4 | 20.3 | 1901.8 | 13.0 | 1907.7 | 15.6 | 1903  | 25  | -0.59256876 |
| 88  | Y-97 Spot 99  | 94  | 291  | 138813  | 3.1  | 8.5550  | 0.7 | 5.5564  | 1.3 | 0.3449 | 1.1 | 0.84 | 1910.2 | 18.5 | 1909.4 | 11.5 | 1908.4 | 13.1 | 1909  | 22  | 0.09528633  |
| 89  | Y-97 Spot 100 | 50  | 95   | 78364   | 1.9  | 16.8559 | 1.6 | 0.4839  | 2.0 | 0.0592 | 1.2 | 0.59 | 370.7  | 4.4  | 400.8  | 6.8  | 578.2  | 35.8 |       |     |             |
| 90  | Y-97 Spot 101 | 305 | 752  | 65982   | 2.5  | 8.6656  | 0.5 | 5.1238  | 1.3 | 0.3222 | 1.1 | 0.90 | 1800.3 | 17.9 | 1840.1 | 10.7 | 1885.3 | 9.8  |       |     |             |
| 91  | Y-97 Spot 102 | 136 | 264  | 59353   | 1.9  | 17.9091 | 0.9 | 0.4678  | 1.6 | 0.0608 | 1.3 | 0.82 | 380.4  | 4.8  | 389.7  | 5.2  | 444.9  | 20.6 | 383.1 | 9.5 | -14.4959753 |
| 92  | Y-97 Spot 103 | 58  | 486  | 69428   | 8.4  | 8.4148  | 0.7 | 5.4386  | 1.5 | 0.3321 | 1.4 | 0.90 | 1848.4 | 21.9 | 1891.0 | 13.0 | 1938.0 | 11.9 |       |     |             |
| 93  | Y-97 Spot 104 | 78  | 151  | 6919    | 1.9  | 15.4643 | 2.7 | 0.5178  | 3.0 | 0.0581 | 1.2 | 0.40 | 364.1  | 4.2  | 423.7  | 10.2 | 762.5  | 57.1 |       |     |             |
| 94  | Y-97 Spot 105 | 477 | 402  | 40657   | 0.8  | 18.7388 | 1.6 | 0.4578  | 2.4 | 0.0622 | 1.8 | 0.75 | 389.3  | 6.7  | 382.7  | 7.5  | 343.4  | 35.5 | 387   | 13  | 13.36942377 |
| 95  | Y-97 Spot 106 | 88  | 140  | 93199   | 1.6  | 17.5419 | 1.0 | 0.5955  | 1.5 | 0.0758 | 1.2 | 0.78 | 471.0  | 5.4  | 474.4  | 5.8  | 490.8  | 21.2 | 472   | 11  | -4.03940111 |
| 96  | Y-97 Spot 107 | 293 | 344  | 284770  | 1.2  | 18.6930 | 0.9 | 0.3916  | 1.4 | 0.0531 | 1.1 | 0.79 | 333.6  | 3.6  | 335.5  | 4.0  | 348.9  | 19.5 | 334.1 | 7.2 | -4.39106458 |
| 97  | Y-97 Spot 108 | 166 | 240  | 766328  | 1.5  | 6.0115  | 0.7 | 10.6643 | 1.5 | 0.4652 | 1.3 | 0.89 | 2462.3 | 26.7 | 2494.3 | 13.6 | 2520.5 | 11.4 | 2511  | 21  | -2.30735949 |
| 98  | Y-97 Spot 109 | 244 | 304  | 127566  | 1.2  | 8.0571  | 0.8 | 5.8814  | 1.6 | 0.3438 | 1.4 | 0.88 | 1905.1 | 23.2 | 1958.5 | 13.9 | 2015.4 | 13.4 |       |     |             |
| 99  | Y-97 Spot 110 | 357 | 460  | 70847   | 1.3  | 19.1245 | 1.0 | 0.3782  | 1.9 | 0.0525 | 1.7 | 0.86 | 329.7  | 5.3  | 325.7  | 5.3  | 297.1  | 21.9 | 328   | 10  | 11.00019598 |
| 100 | Y-97 Spot 112 | 160 | 403  | 244234  | 2.5  | 6.0609  | 0.7 | 10.6263 | 1.2 | 0.4673 | 1.0 | 0.81 | 2471.8 | 20.4 | 2491.0 | 11.3 | 2506.7 | 11.9 | 2497  | 21  | -1.39521859 |
| 101 | Y-97 Spot 113 | 57  | 447  | 82069   | 7.9  | 8.6435  | 0.7 | 4.5182  | 1.4 | 0.2834 | 1.3 | 0.88 | 1608.3 | 18.1 | 1734.3 | 12.0 | 1889.9 | 12.6 |       |     |             |
| 102 | Y-97 Spot 114 | 422 | 279  | 285870  | 0.7  | 18.4358 | 1.0 | 0.4426  | 1.6 | 0.0592 | 1.3 | 0.80 | 370.8  | 4.7  | 372.1  | 5.1  | 380.1  | 22.3 | 371.2 | 9.2 | -2.46058014 |
| 103 | Y-97 Spot 115 | 73  | 99   | 202350  | 1.4  | 6.1350  | 0.8 | 10.9115 | 1.5 | 0.4857 | 1.2 | 0.85 | 2552.1 | 26.2 | 2515.6 | 13.7 | 2486.3 | 13.2 | 2500  | 24  | 2.648685304 |
| 104 | Y-97 Spot 116 | 147 | 1412 | 147084  | 9.6  | 8.4202  | 0.7 | 5.6896  | 1.3 | 0.3476 | 1.1 | 0.85 | 1923.2 | 18.9 | 1929.8 | 11.5 | 1936.9 | 12.6 | 1933  | 21  | -0.70771401 |
| 105 | Y-97 Spot 117 | 146 | 218  | 75861   | 1.5  | 8.7652  | 0.7 | 5.3799  | 1.5 | 0.3422 | 1.3 | 0.88 | 1897.0 | 21.1 | 1881.7 | 12.5 | 1864.7 | 12.7 | 1874  | 22  | 1.733479308 |
| 106 | Y-97 Spot 118 | 143 | 374  | 219678  | 2.6  | 8.8651  | 0.7 | 5.1409  | 1.3 | 0.3307 | 1.1 | 0.83 | 1841.7 | 17.4 | 1842.9 | 11.2 | 1844.2 | 13.3 | 1843  | 21  | -0.13814942 |
| 107 | Y-97 Spot 119 | 79  | 95   | 197776  | 1.2  | 8.7326  | 0.9 | 5.3462  | 1.8 | 0.3387 | 1.5 | 0.86 | 1880.6 | 25.0 | 1876.3 | 15.2 | 1871.4 | 16.3 | 1874  | 28  | 0.490493509 |
| 108 | Y-97 Spot 120 | 387 | 226  | 6       |      |         |     |         |     |        |     |      |        |      |        |      |        |      |       |     |             |

|                                                             |               |     |     |         |     |         |     |         |     |        |     |      |        |      |        |      |        |      |       |     |             |
|-------------------------------------------------------------|---------------|-----|-----|---------|-----|---------|-----|---------|-----|--------|-----|------|--------|------|--------|------|--------|------|-------|-----|-------------|
| 112                                                         | Y-97 Spot 124 | 443 | 686 | 68757   | 1.5 | 8.4605  | 0.7 | 5.3896  | 1.9 | 0.3309 | 1.7 | 0.93 | 1842.6 | 27.7 | 1883.2 | 16.0 | 1928.3 | 12.4 | 1914  | 23  | -4.44815798 |
| 113                                                         | Y-97 Spot 126 | 178 | 308 | 40336   | 1.7 | 17.5610 | 1.2 | 0.4721  | 1.8 | 0.0602 | 1.3 | 0.73 | 376.6  | 4.7  | 392.6  | 5.7  | 488.4  | 26.5 |       |     |             |
| 114                                                         | Y-97 Spot 127 | 146 | 430 | 233226  | 2.9 | 6.6881  | 0.8 | 8.3649  | 1.4 | 0.4059 | 1.1 | 0.79 | 2196.3 | 20.3 | 2271.4 | 12.4 | 2339.7 | 14.3 |       |     |             |
| 115                                                         | Y-97 Spot 129 | 146 | 303 | 1587224 | 2.1 | 6.5703  | 0.7 | 8.5523  | 1.4 | 0.4077 | 1.3 | 0.89 | 2204.5 | 23.4 | 2291.5 | 12.9 | 2370.0 | 11.2 |       |     |             |
| 116                                                         | Y-97 Spot 130 | 129 | 308 | 400834  | 2.4 | 8.7094  | 0.7 | 5.2825  | 1.3 | 0.3338 | 1.1 | 0.86 | 1856.9 | 17.5 | 1866.0 | 10.8 | 1876.2 | 11.8 | 1870  | 20  | -1.03139139 |
| <i>Sample Y-94: a sandstone of the Zhipkhoshi Formation</i> |               |     |     |         |     |         |     |         |     |        |     |      |        |      |        |      |        |      |       |     |             |
| 1                                                           | Y-94 Spot 1   | 183 | 451 | 113433  | 2.5 | 18.2162 | 0.7 | 0.4895  | 1.2 | 0.0647 | 1.0 | 0.80 | 404.1  | 3.9  | 404.6  | 4.1  | 407.0  | 16.2 | 404.3 | 7.5 | -0.70503874 |
| 2                                                           | Y-94 Spot 2   | 97  | 114 | 118351  | 1.2 | 15.2069 | 0.8 | 1.2123  | 1.4 | 0.1338 | 1.1 | 0.81 | 809.3  | 8.7  | 806.3  | 7.8  | 797.8  | 17.2 | 807   | 15  | 1.443940241 |
| 3                                                           | Y-94 Spot 3   | 46  | 78  | 11947   | 1.7 | 16.9525 | 3.1 | 0.4551  | 3.2 | 0.0560 | 1.1 | 0.33 | 351.1  | 3.6  | 380.8  | 10.3 | 565.7  | 66.8 | 351.3 | 7.2 | -37.937233  |
| 4                                                           | Y-94 Spot 4   | 84  | 142 | 105405  | 1.7 | 18.6831 | 0.8 | 0.3926  | 1.4 | 0.0532 | 1.2 | 0.82 | 334.2  | 3.9  | 336.2  | 4.1  | 350.1  | 18.6 | 334.9 | 7.6 | -4.52786324 |
| 5                                                           | Y-94 Spot 5   | 197 | 342 | 58765   | 1.7 | 17.6932 | 1.3 | 0.4049  | 2.0 | 0.0520 | 1.5 | 0.76 | 326.7  | 4.8  | 345.2  | 5.8  | 471.8  | 28.4 |       |     |             |
| 6                                                           | Y-94 Spot 6   | 68  | 137 | 33458   | 2.0 | 17.9699 | 2.1 | 0.4677  | 2.4 | 0.0610 | 1.3 | 0.52 | 381.6  | 4.7  | 389.6  | 7.9  | 437.4  | 46.6 | 382   | 9.4 | -12.7572689 |
| 7                                                           | Y-94 Spot 7   | 112 | 243 | 41075   | 2.2 | 18.9238 | 0.6 | 0.3682  | 1.1 | 0.0506 | 1.0 | 0.86 | 317.9  | 3.0  | 318.3  | 3.1  | 321.1  | 13.0 | 318.1 | 5.9 | -0.98917764 |
| 8                                                           | Y-94 Spot 9   | 73  | 228 | 105278  | 3.1 | 18.0423 | 1.2 | 0.4575  | 1.8 | 0.0599 | 1.3 | 0.73 | 375.0  | 4.7  | 382.5  | 5.6  | 428.4  | 26.9 | 376.3 | 9.2 | -12.4691523 |
| 9                                                           | Y-94 Spot 10  | 159 | 336 | 111471  | 2.1 | 18.8538 | 0.7 | 0.3949  | 1.3 | 0.0540 | 1.1 | 0.83 | 339.1  | 3.6  | 337.9  | 3.7  | 329.5  | 16.6 | 338.7 | 7   | 2.930633437 |
| 10                                                          | Y-94 Spot 11  | 193 | 270 | 305814  | 1.4 | 19.2742 | 0.8 | 0.3575  | 1.3 | 0.0500 | 1.0 | 0.80 | 314.5  | 3.2  | 310.3  | 3.4  | 279.3  | 17.5 | 313.2 | 6.2 | 12.60368642 |
| 11                                                          | Y-94 Spot 12  | 47  | 162 | 101541  | 3.5 | 18.9474 | 1.0 | 0.3711  | 1.5 | 0.0510 | 1.2 | 0.78 | 320.8  | 3.7  | 320.5  | 4.2  | 318.2  | 21.8 | 320.7 | 7.3 | 0.810056643 |
| 12                                                          | Y-94 Spot 13  | 148 | 136 | 52692   | 0.9 | 17.0967 | 1.5 | 0.6473  | 1.8 | 0.0803 | 1.0 | 0.57 | 497.9  | 5.0  | 506.8  | 7.2  | 547.3  | 32.6 | 498.9 | 9.8 | -9.01482837 |
| 13                                                          | Y-94 Spot 14  | 78  | 109 | 23519   | 1.4 | 19.0442 | 1.0 | 0.4056  | 1.7 | 0.0560 | 1.4 | 0.81 | 351.5  | 4.7  | 345.7  | 4.9  | 306.7  | 22.2 | 349.3 | 9.1 | 14.6143866  |
| 14                                                          | Y-94 Spot 15  | 23  | 53  | 98373   | 2.3 | 8.8209  | 0.7 | 5.1907  | 1.4 | 0.3322 | 1.2 | 0.84 | 1849.1 | 18.6 | 1851.1 | 11.7 | 1853.3 | 13.3 | 1852  | 22  | -0.22381014 |
| 15                                                          | Y-94 Spot 16  | 64  | 101 | 511832  | 1.6 | 18.7747 | 0.9 | 0.4191  | 1.4 | 0.0571 | 1.1 | 0.76 | 357.9  | 3.8  | 355.4  | 4.3  | 339.1  | 20.8 | 357.3 | 7.4 | 5.567076554 |
| 16                                                          | Y-94 Spot 19  | 94  | 204 | 108960  | 2.2 | 17.8451 | 1.0 | 0.4227  | 1.7 | 0.0547 | 1.3 | 0.81 | 343.5  | 4.5  | 358.0  | 5.0  | 452.9  | 21.6 |       |     |             |
| 17                                                          | Y-94 Spot 20  | 82  | 126 | 111489  | 1.5 | 14.7239 | 0.9 | 1.2622  | 1.5 | 0.1348 | 1.2 | 0.80 | 815.9  | 9.4  | 828.9  | 8.7  | 865.1  | 19.0 | 825   | 17  | -5.74228319 |
| 18                                                          | Y-94 Spot 21  | 50  | 123 | 80610   | 2.5 | 18.2325 | 0.8 | 0.5007  | 1.5 | 0.0662 | 1.2 | 0.83 | 413.5  | 4.9  | 412.2  | 5.0  | 405.0  | 18.3 | 412.9 | 9.5 | 2.094837304 |
| 19                                                          | Y-94 Spot 23  | 38  | 46  | 34619   | 1.2 | 15.2956 | 0.9 | 1.1592  | 1.6 | 0.1286 | 1.3 | 0.83 | 780.2  | 9.5  | 781.6  | 8.5  | 785.6  | 18.3 | 781   | 17  | -0.69364126 |
| 20                                                          | Y-94 Spot 24  | 79  | 127 | 620521  | 1.6 | 8.4164  | 0.6 | 5.6721  | 1.2 | 0.3464 | 1.0 | 0.87 | 1917.3 | 17.2 | 1927.1 | 10.2 | 1937.7 | 10.4 | 1932  | 18  | -1.0509604  |
| 21                                                          | Y-94 Spot 25  | 124 | 287 | 81865   | 2.3 | 18.6617 | 0.9 | 0.3863  | 1.4 | 0.0523 | 1.1 | 0.80 | 328.7  | 3.6  | 331.7  | 4.0  | 352.7  | 19.2 | 329.4 | 7.2 | -6.80326246 |
| 22                                                          | Y-94 Spot 26  | 145 | 304 | 93569   | 2.1 | 18.7196 | 0.7 | 0.3849  | 1.4 | 0.0523 | 1.2 | 0.85 | 328.5  | 3.8  | 330.7  | 3.9  | 345.7  | 16.4 | 329.3 | 7.4 | -4.95721981 |
| 23                                                          | Y-94 Spot 29  | 75  | 69  | 37294   | 0.9 | 19.1560 | 1.2 | 0.3816  | 1.6 | 0.0530 | 1.1 | 0.67 | 333.2  | 3.5  | 328.2  | 4.4  | 293.3  | 26.6 | 332.4 | 6.8 | 13.57884572 |
| 24                                                          | Y-94 Spot 30  | 40  | 44  | 93953   | 1.1 | 18.8836 | 1.2 | 0.3829  | 1.6 | 0.0525 | 1.1 | 0.67 | 329.7  | 3.5  | 329.2  | 4.6  | 325.9  | 27.4 | 329.6 | 7   | 1.154958954 |
| 25                                                          | Y-94 Spot 31  | 42  | 127 | 1069440 | 3.0 | 8.7261  | 0.7 | 5.2748  | 1.3 | 0.3340 | 1.1 | 0.86 | 1857.6 | 18.2 | 1864.8 | 11.2 | 1872.8 | 12.0 | 1868  | 20  | -0.81114769 |
| 26                                                          | Y-94 Spot 32  | 11  | 32  | 56373   | 3.0 | 7.6239  | 0.8 | 7.1036  | 1.5 | 0.3930 | 1.2 | 0.84 | 2136.5 | 22.3 | 2124.5 | 13.0 | 2112.9 | 13.8 | 2120  | 24  | 1.118622927 |
| 27                                                          | Y-94 Spot 33  | 184 | 188 | 96537   | 1.0 | 19.0757 | 0.9 | 0.3930  | 1.3 | 0.0544 | 1.0 | 0.75 | 341.4  | 3.4  | 336.5  | 3.8  | 302.9  | 20.1 | 340.2 | 6.6 | 12.71826578 |
| 28                                                          | Y-94 Spot 34  | 146 | 131 | 122167  | 0.9 | 18.9967 | 1.0 | 0.3757  | 1.4 | 0.0518 | 0.9 | 0.69 | 325.5  | 3.0  | 323.9  | 3.8  | 312.4  | 22.7 | 325.3 | 5.9 | 4.204880721 |
| 29                                                          | Y-94 Spot 36  | 142 | 434 | 169077  | 3.1 | 18.6523 | 0.7 | 0.4170  | 1.2 | 0.0564 | 1.0 | 0.80 | 353.9  | 3.3  | 353.9  | 3.6  | 353.9  | 16.2 | 353.9 | 6.5 | 0.016097289 |
| 30                                                          | Y-94 Spot 37  | 28  | 87  | 140547  | 3.2 | 5.9459  | 0.8 | 11.4246 | 1.5 | 0.4929 | 1.3 | 0.85 | 2583.1 | 27.2 | 2558.4 | 14.1 | 2538.9 | 13.5 | 2548  | 25  | 1.742303369 |
| 31                                                          | Y-94 Spot 38  | 258 | 296 | 66720   | 1.1 | 18.9747 | 0.8 | 0.3675  | 1.1 | 0.0506 | 0.7 | 0.70 | 318.1  | 2.3  | 317.8  | 2.9  | 315.0  | 17.1 | 318.1 | 4.5 | 1.000072087 |
| 32                                                          | Y-94 Spot 39  | 189 | 246 | 69464   | 1.3 | 19.0462 | 0.7 | 0.3836  | 1.3 | 0.0530 | 1.1 | 0.85 | 333.0  | 3.7  | 329.7  | 3.8  | 306.4  | 15.9 | 331.5 | 7.2 | 8.672236881 |
| 33                                                          | Y-94 Spot 40  | 124 | 184 | 273291  | 1.5 | 8.4989  | 0.6 | 5.6712  | 1.2 | 0.3497 | 1.0 | 0.84 | 1933.3 | 16.6 | 1927.0 | 10.2 | 1920.2 | 11.3 | 1925  | 19  | 0.679807679 |
| 34                                                          | Y-94 Spot 41  | 178 | 249 | 73047   | 1.4 | 18.4649 | 0.9 | 0.4114  | 1.7 | 0.0551 | 1.5 | 0.86 | 345.9  | 5.0  | 349.9  | 5.2  | 376.6  | 20.2 | 347.5 | 9.8 | -8.15829998 |
| 35                                                          | Y-94 Spot 42  | 42  | 74  | 95748   | 1.8 | 8.0436  | 0.6 | 6.3507  | 1.3 | 0.3706 | 1.2 | 0.88 | 2032.4 | 20.4 | 2025.5 | 11.7 | 2018.4 | 11.2 | 2022  | 20  | 0.695699847 |
| 36                                                          | Y-94 Spot 43  | 133 | 370 | 112708  | 2.8 | 18.6062 | 0.6 | 0.4176  | 1.4 | 0.0564 | 1.3 | 0.91 | 353.5  | 4.3  | 354.3  | 4.1  | 359.4  | 13.0 | 354.1 | 8.2 | -1.63395087 |
| 37                                                          | Y-94 Spot 44  | 53  | 150 | 71229   | 2.8 | 17.5885 | 0.8 | 0.6322  | 1.4 | 0.0807 | 1.2 | 0.82 | 500.2  | 5.6  | 497.5  | 5.6  | 485.0  | 18.2 | 499   | 11  | 3.137097124 |
| 38                                                          | Y-94 Spot 45  | 157 | 254 | 108050  | 1.6 | 19.0863 | 0.8 | 0.3823  | 1.6 | 0.0529 | 1.3 | 0.85 | 332.6  | 4.3  | 328.8  | 4.4  | 301.7  | 18.5 | 330.9 | 8.4 | 10.25700767 |
| 39                                                          | Y-94 Spot 46  | 29  | 43  | 12720   | 1.5 | 19.2847 | 1.2 | 0.4027  | 1.9 | 0.0564 | 1.5 | 0.77 | 353.4  | 5.1  | 343.6  | 5.6  | 278.0  | 28.1 | 350.4 | 9.9 | 27.11499178 |
| 40                                                          | Y-94 Spot 47  | 150 | 249 | 45383   | 1.7 | 18.8034 | 0.8 | 0.3990  | 1.4 | 0.0544 | 1.1 | 0.80 | 341.7  | 3.6  | 340.9  | 3.9  | 335.6  | 18.6 | 341.5 | 7   | 1.826702335 |
| 41                                                          | Y-94 Spot 48  | 66  | 167 | 131629  | 2.5 | 17.4181 | 0.8 | 0.6473  | 1.4 | 0.0818 | 1.2 | 0.84 | 506.9  | 5.7  | 506.8  | 5.6  | 506.4  | 16.7 | 507   | 11  | 0.092287384 |
| 42                                                          | Y-94 Spot 49  | 249 | 318 | 166115  | 1.3 | 18.9695 | 0.9 | 0.3680  | 1.4 | 0.0507 | 1.1 | 0.79 | 318.5  | 3.5  | 318.2  | 3.9  | 315.6  | 20.0 | 318.4 | 7   | 0.929072193 |
| 43                                                          | Y-94 Spot 50  | 18  | 27  | 15131   | 1.5 | 19.4171 | 1.8 | 0.3657  | 2.2 | 0.0515 | 1.3 | 0.59 | 323.9  | 4.2  | 316.5  | 6.1  | 262.3  | 41.9 | 323.1 | 8.3 | 23.47911215 |
| 44                                                          | Y-94 Spot 51  | 44  | 105 | 237787  | 2.4 | 8.0482  | 0.6 | 6.3867  | 1.2 | 0.3730 | 1.0 | 0.85 | 2043.3 | 17.5 | 2030.4 | 10.4 | 2017.4 | 11.1 | 2025  | 19  | 1.286444164 |
| 45                                                          | Y-94 Spot 52  | 48  | 157 | 204546  | 3.3 | 8.7982  | 0.8 | 5.1335  | 1.4 | 0.3277 | 1.1 | 0.83 | 1827.3 | 18.1 | 1841.7 | 11.6 | 1857.9 | 13.7 | 1847  | 22  | -1.64863967 |
| 46                                                          | Y-94 Spot 53  | 299 | 382 | 1362650 | 1.3 | 18.8549 | 0.7 | 0.3648  | 1.5 | 0.0499 | 1.3 | 0.88 | 313.9  | 3.9  | 315.8  | 4.0  | 329.4  | 15.9 | 314.8 | 7.6 | -4.68523273 |
| 47                                                          | Y-94 Spot 54  | 109 | 294 | 763355  | 2.7 | 16.4145 | 1.3 | 0.4779  | 2.1 | 0.0569 | 1.6 | 0.77 | 356.8  | 5.6  | 396.6  | 6.8  | 635.6  | 28.1 |       |     |             |
| 48                                                          | Y-94 Spot 55  | 76  | 176 | 94365   | 2.3 | 18.5773 | 0.9 | 0.4032  | 1.6 | 0.0543 | 1.3 | 0.82 | 341.1  | 4.3  | 343.9  | 4.6  | 362.9  | 19.9 | 342   | 8.4 | -5.99996842 |
| 49                                                          | Y-94 Spot 56  | 45  | 59  | 54482   | 1.3 | 8.8866  | 0.9 | 5.2401  | 1.4 | 0.3379 | 1.0 | 0.75 | 1876.5 | 16.7 | 1859.2 | 11.7 | 1839.8 | 16.6 | 1858  | 24  | 1.990082908 |
| 50                                                          | Y-94 Spot 57  | 236 | 186 | 116299  | 0.8 | 18.8854 | 1.0 | 0.3872  | 1.7 | 0.0531 | 1.3 | 0.81 | 333.2  | 4.4  | 332.3  | 4.7  | 325.7  | 22.0 | 332.9 | 8.6 | 2.303721029 |
| 51                                                          | Y-94 Spot 58  | 53  | 66  | 17458   | 1.2 | 18.7748 | 0.8 | 0.4590  | 1.4 | 0.0625 | 1.2 | 0.84 | 391.0  | 4.6  | 383.6  | 4.6  | 339.0  | 17.7 | 387.3 | 8.8 | 15.31471066 |
| 52                                                          | Y-94 Spot 59  | 81  | 98  | 276358  | 1.2 | 18.9658 | 1.1 | 0.3755  | 1.6 | 0.0517 | 1.2 | 0.76 | 324.8  | 3.9  | 323.7  | 4.6  | 316.0  | 24.6 | 324.6 |     |             |

|     |               |      |     |         |     |         |     |         |     |        |     |      |        |      |        |      |        |      |       |     |             |
|-----|---------------|------|-----|---------|-----|---------|-----|---------|-----|--------|-----|------|--------|------|--------|------|--------|------|-------|-----|-------------|
| 57  | Y-94 Spot 66  | 17   | 45  | 293444  | 2.7 | 15.1169 | 1.0 | 1.2477  | 1.5 | 0.1369 | 1.2 | 0.77 | 826.9  | 9.1  | 822.4  | 8.6  | 810.3  | 20.6 | 824   | 17  | 2.048917231 |
| 58  | Y-94 Spot 68  | 34   | 56  | 88251   | 1.6 | 18.6298 | 1.0 | 0.4356  | 1.5 | 0.0589 | 1.1 | 0.73 | 368.8  | 3.9  | 367.1  | 4.5  | 356.5  | 22.7 | 368.4 | 7.6 | 3.43803923  |
| 59  | Y-94 Spot 69  | 33   | 80  | 99420   | 2.4 | 18.8206 | 1.0 | 0.3994  | 1.7 | 0.0545 | 1.3 | 0.78 | 342.3  | 4.3  | 341.2  | 4.8  | 333.5  | 23.3 | 342   | 8.5 | 2.651164842 |
| 60  | Y-94 Spot 70  | 25   | 73  | 78584   | 3.0 | 12.2612 | 0.7 | 1.9929  | 1.3 | 0.1773 | 1.0 | 0.82 | 1052.2 | 10.2 | 1113.1 | 8.7  | 1234.1 | 14.6 |       |     |             |
| 61  | Y-94 Spot 71  | 64   | 217 | 374237  | 3.4 | 14.8081 | 0.9 | 1.3335  | 1.7 | 0.1433 | 1.4 | 0.84 | 863.2  | 11.3 | 860.4  | 9.6  | 853.3  | 18.6 | 861   | 19  | 1.155495028 |
| 62  | Y-94 Spot 72  | 150  | 548 | 702259  | 3.6 | 18.1136 | 0.7 | 0.5254  | 1.4 | 0.0691 | 1.2 | 0.84 | 430.4  | 4.8  | 428.7  | 4.8  | 419.6  | 16.5 | 429.6 | 9.3 | 2.577444726 |
| 63  | Y-94 Spot 73  | 16   | 62  | 26776   | 3.8 | 18.9168 | 1.0 | 0.4529  | 1.5 | 0.0622 | 1.1 | 0.71 | 388.8  | 4.0  | 379.3  | 4.7  | 322.0  | 23.5 | 386.5 | 7.8 | 20.75934002 |
| 64  | Y-94 Spot 74  | 9    | 17  | 3482    | 1.9 | 20.2217 | 1.8 | 0.3688  | 2.2 | 0.0541 | 1.3 | 0.60 | 339.7  | 4.4  | 318.8  | 6.0  | 168.3  | 41.0 |       |     |             |
| 65  | Y-94 Spot 75  | 183  | 277 | 92816   | 1.5 | 18.9902 | 0.8 | 0.3768  | 1.3 | 0.0519 | 1.0 | 0.78 | 326.3  | 3.2  | 324.7  | 3.6  | 313.1  | 18.6 | 325.9 | 6.3 | 4.188457695 |
| 66  | Y-94 Spot 76  | 79   | 128 | 33640   | 1.6 | 18.6850 | 1.1 | 0.4093  | 1.7 | 0.0555 | 1.3 | 0.77 | 348.1  | 4.3  | 348.4  | 4.9  | 349.9  | 24.0 | 348.2 | 8.5 | -0.50048561 |
| 67  | Y-94 Spot 77  | 133  | 181 | 195686  | 1.4 | 18.7971 | 0.8 | 0.3880  | 1.5 | 0.0529 | 1.2 | 0.82 | 332.4  | 3.9  | 332.9  | 4.1  | 336.3  | 18.9 | 332.5 | 7.6 | -1.17133451 |
| 68  | Y-94 Spot 78  | 26   | 67  | 207717  | 2.6 | 8.8433  | 0.6 | 5.1737  | 1.3 | 0.3320 | 1.2 | 0.88 | 1847.9 | 18.6 | 1848.3 | 11.2 | 1848.7 | 11.3 | 1848  | 20  | -0.04166782 |
| 69  | Y-94 Spot 80  | 74   | 109 | 89464   | 1.5 | 18.8360 | 0.9 | 0.3803  | 1.4 | 0.0520 | 1.1 | 0.79 | 326.6  | 3.6  | 327.3  | 4.0  | 331.7  | 19.7 | 326.8 | 7   | -1.51311607 |
| 70  | Y-94 Spot 81  | 36   | 81  | 93449   | 2.2 | 18.9985 | 1.1 | 0.3800  | 1.8 | 0.0524 | 1.4 | 0.77 | 329.2  | 4.4  | 327.1  | 5.0  | 312.2  | 25.6 | 328.6 | 8.7 | 5.447506613 |
| 71  | Y-94 Spot 82  | 35   | 106 | 514146  | 3.0 | 15.4309 | 0.9 | 1.1775  | 1.4 | 0.1318 | 1.0 | 0.76 | 798.3  | 7.8  | 790.1  | 7.5  | 767.1  | 18.7 | 794   | 14  | 4.075738882 |
| 72  | Y-94 Spot 83  | 256  | 366 | 145252  | 1.4 | 18.8353 | 0.7 | 0.3713  | 1.3 | 0.0507 | 1.1 | 0.85 | 319.1  | 3.4  | 320.6  | 3.5  | 331.7  | 15.1 | 319.7 | 6.6 | -3.81770575 |
| 73  | Y-94 Spot 84  | 47   | 76  | 165104  | 1.6 | 7.9917  | 0.7 | 6.3882  | 1.5 | 0.3704 | 1.3 | 0.88 | 2031.4 | 22.5 | 2030.7 | 12.9 | 2029.8 | 12.4 | 2030  | 22  | 0.078602632 |
| 74  | Y-94 Spot 85  | 83   | 147 | 967913  | 1.8 | 19.0429 | 0.6 | 0.4018  | 1.1 | 0.0555 | 0.9 | 0.81 | 348.3  | 3.1  | 342.9  | 3.3  | 306.8  | 14.8 | 343.6 | 6   | 13.51312823 |
| 75  | Y-94 Spot 86  | 43   | 193 | 458370  | 4.5 | 17.1839 | 0.7 | 0.6463  | 1.5 | 0.0806 | 1.3 | 0.88 | 499.6  | 6.4  | 506.2  | 6.0  | 536.1  | 15.8 | 504   | 12  | -6.81710815 |
| 76  | Y-94 Spot 87  | 56   | 270 | 118821  | 4.9 | 17.5739 | 0.7 | 0.6209  | 1.4 | 0.0792 | 1.1 | 0.84 | 491.2  | 5.4  | 490.4  | 5.3  | 486.8  | 16.3 | 491   | 10  | 0.899778783 |
| 77  | Y-94 Spot 88  | 56   | 154 | 83196   | 2.8 | 19.0572 | 0.8 | 0.4046  | 1.5 | 0.0559 | 1.2 | 0.83 | 350.9  | 4.2  | 345.0  | 4.3  | 305.1  | 18.9 | 348.5 | 8.1 | 15.00599729 |
| 78  | Y-94 Spot 89  | 71   | 330 | 206799  | 4.6 | 18.6179 | 0.8 | 0.4297  | 1.2 | 0.0581 | 0.9 | 0.75 | 363.8  | 3.2  | 363.0  | 3.7  | 358.0  | 18.4 | 363.6 | 6.3 | 1.615868138 |
| 79  | Y-94 Spot 91  | 1440 | 558 | 151737  | 0.4 | 18.4467 | 0.5 | 0.4643  | 1.2 | 0.0621 | 1.0 | 0.88 | 388.7  | 3.9  | 387.2  | 3.8  | 378.8  | 12.2 | 387.7 | 7.4 | 2.60411106  |
| 80  | Y-94 Spot 92  | 108  | 171 | 96322   | 1.6 | 18.2535 | 0.7 | 0.4531  | 1.4 | 0.0600 | 1.2 | 0.85 | 375.7  | 4.2  | 379.5  | 4.3  | 402.4  | 15.7 | 377.4 | 8.2 | -6.63651624 |
| 81  | Y-94 Spot 94  | 61   | 87  | 27120   | 1.4 | 19.0284 | 1.0 | 0.3871  | 1.4 | 0.0534 | 1.0 | 0.72 | 335.6  | 3.3  | 332.2  | 4.0  | 308.6  | 22.2 | 335   | 6.4 | 8.762844533 |
| 82  | Y-94 Spot 95  | 20   | 73  | 118942  | 3.7 | 8.8607  | 0.7 | 5.3464  | 1.3 | 0.3437 | 1.1 | 0.82 | 1904.6 | 17.5 | 1876.3 | 11.0 | 1845.1 | 13.3 | 1868  | 21  | 3.22175975  |
| 83  | Y-94 Spot 96  | 38   | 84  | 261316  | 2.2 | 5.1442  | 0.7 | 14.5731 | 1.3 | 0.5440 | 1.1 | 0.84 | 2800.0 | 25.4 | 2787.8 | 12.6 | 2779.0 | 11.8 | 2783  | 22  | 0.755796774 |
| 84  | Y-94 Spot 97  | 95   | 186 | 45730   | 2.0 | 18.6265 | 1.2 | 0.3998  | 1.8 | 0.0540 | 1.4 | 0.76 | 339.2  | 4.6  | 341.5  | 5.3  | 356.9  | 26.4 | 339.7 | 9   | -4.95727324 |
| 85  | Y-94 Spot 98  | 23   | 46  | 362742  | 2.0 | 8.5670  | 0.7 | 5.6753  | 1.4 | 0.3528 | 1.2 | 0.85 | 1947.9 | 19.8 | 1927.6 | 12.0 | 1905.9 | 13.1 | 1919  | 22  | 2.202293087 |
| 86  | Y-94 Spot 99  | 87   | 183 | 75435   | 2.1 | 18.9621 | 0.9 | 0.3738  | 1.4 | 0.0514 | 1.0 | 0.76 | 323.3  | 3.3  | 322.5  | 3.8  | 316.5  | 20.4 | 323.1 | 6.5 | 2.149191263 |
| 87  | Y-94 Spot 101 | 50   | 82  | 91530   | 1.6 | 14.5246 | 0.6 | 1.4186  | 1.2 | 0.1495 | 1.1 | 0.86 | 898.2  | 8.9  | 896.8  | 7.4  | 893.3  | 13.2 | 897   | 15  | 0.543029421 |
| 88  | Y-94 Spot 102 | 23   | 60  | 87894   | 2.6 | 9.0987  | 0.7 | 3.9282  | 1.4 | 0.2593 | 1.2 | 0.87 | 1486.4 | 15.9 | 1619.5 | 11.1 | 1797.0 | 12.2 |       |     |             |
| 89  | Y-94 Spot 103 | 44   | 94  | 146288  | 2.1 | 18.1831 | 0.8 | 0.5108  | 1.6 | 0.0674 | 1.4 | 0.88 | 420.4  | 5.8  | 419.0  | 5.6  | 411.1  | 17.4 | 419   | 11  | 2.272410594 |
| 90  | Y-94 Spot 104 | 17   | 45  | 57776   | 2.6 | 15.1850 | 0.9 | 1.2071  | 1.4 | 0.1330 | 1.1 | 0.79 | 805.0  | 8.3  | 803.9  | 7.7  | 800.8  | 18.0 | 804   | 15  | 0.516480304 |
| 91  | Y-94 Spot 105 | 75   | 191 | 189198  | 2.5 | 18.9661 | 0.8 | 0.3646  | 1.4 | 0.0502 | 1.1 | 0.80 | 315.6  | 3.4  | 315.6  | 3.7  | 316.0  | 18.8 | 315.6 | 6.7 | -0.13069068 |
| 92  | Y-94 Spot 106 | 316  | 394 | 219525  | 1.2 | 19.0204 | 0.9 | 0.3747  | 1.3 | 0.0517 | 0.9 | 0.69 | 325.0  | 2.8  | 323.1  | 3.6  | 309.5  | 21.2 | 324.7 | 5.5 | 5.013977631 |
| 93  | Y-94 Spot 107 | 59   | 219 | 2569080 | 3.7 | 8.3419  | 0.7 | 5.7969  | 1.5 | 0.3509 | 1.3 | 0.86 | 1938.8 | 21.3 | 1946.0 | 12.8 | 1953.6 | 13.4 | 1949  | 23  | -0.75839642 |
| 94  | Y-94 Spot 108 | 135  | 315 | 57846   | 2.3 | 18.4306 | 0.8 | 0.4447  | 1.3 | 0.0595 | 1.1 | 0.82 | 372.4  | 3.9  | 373.5  | 4.1  | 380.8  | 16.9 | 372.8 | 7.6 | -2.20518382 |
| 95  | Y-94 Spot 109 | 63   | 74  | 105668  | 1.2 | 8.7856  | 0.7 | 5.3438  | 1.4 | 0.3407 | 1.2 | 0.85 | 1889.8 | 19.7 | 1875.9 | 12.0 | 1860.5 | 13.2 | 1870  | 22  | 1.574198382 |
| 96  | Y-94 Spot 110 | 119  | 172 | 100002  | 1.4 | 16.2056 | 2.9 | 0.4869  | 3.1 | 0.0573 | 1.0 | 0.31 | 358.9  | 3.3  | 402.8  | 10.3 | 663.1  | 62.8 |       |     |             |
| 97  | Y-94 Spot 111 | 128  | 191 | 121774  | 1.5 | 18.0848 | 0.7 | 0.4916  | 1.3 | 0.0645 | 1.1 | 0.84 | 403.0  | 4.3  | 406.0  | 4.4  | 423.2  | 16.2 | 404.3 | 8.4 | -4.7672276  |
| 98  | Y-94 Spot 112 | 172  | 317 | 167919  | 1.8 | 17.4655 | 0.8 | 0.5933  | 1.1 | 0.0752 | 0.9 | 0.75 | 467.3  | 3.9  | 472.9  | 4.3  | 500.5  | 16.8 | 468.9 | 7.6 | -6.62621203 |
| 99  | Y-94 Spot 113 | 40   | 79  | 85425   | 2.0 | 18.4532 | 0.9 | 0.4186  | 1.4 | 0.0561 | 1.1 | 0.78 | 351.6  | 3.7  | 355.1  | 4.2  | 378.0  | 19.6 | 352.4 | 7.4 | -6.99174443 |
| 100 | Y-94 Spot 114 | 22   | 54  | 81300   | 2.4 | 15.3166 | 0.7 | 1.2151  | 1.4 | 0.1350 | 1.2 | 0.86 | 816.6  | 9.4  | 807.5  | 8.0  | 782.7  | 15.7 | 807   | 16  | 4.323797245 |
| 101 | Y-94 Spot 116 | 18   | 59  | 58053   | 3.3 | 18.6387 | 1.1 | 0.3922  | 1.6 | 0.0530 | 1.3 | 0.76 | 333.1  | 4.1  | 335.9  | 4.7  | 355.5  | 23.9 | 333.7 | 8.1 | -6.28477761 |
| 102 | Y-94 Spot 117 | 54   | 275 | 98261   | 5.1 | 18.5536 | 0.8 | 0.4271  | 1.5 | 0.0575 | 1.3 | 0.86 | 360.4  | 4.5  | 361.1  | 4.5  | 365.8  | 17.4 | 360.7 | 8.7 | -1.47843019 |
| 103 | Y-94 Spot 118 | 133  | 241 | 13557   | 1.8 | 16.1656 | 2.8 | 0.4719  | 3.0 | 0.0553 | 1.2 | 0.41 | 347.3  | 4.2  | 392.5  | 9.9  | 668.4  | 59.2 |       |     |             |
| 104 | Y-94 Spot 119 | 35   | 84  | 117774  | 2.4 | 15.0979 | 0.9 | 1.2668  | 1.5 | 0.1388 | 1.1 | 0.76 | 837.7  | 8.7  | 830.9  | 8.3  | 812.9  | 19.8 | 834   | 16  | 3.051475577 |
| 105 | Y-94 Spot 120 | 163  | 251 | 459381  | 1.5 | 18.6889 | 0.9 | 0.3851  | 1.2 | 0.0522 | 0.8 | 0.70 | 328.2  | 2.7  | 330.8  | 3.4  | 349.4  | 19.5 | 328.5 | 5.4 | -6.07838072 |
| 106 | Y-94 Spot 121 | 53   | 73  | 46645   | 1.4 | 19.1535 | 0.8 | 0.3793  | 1.3 | 0.0527 | 1.0 | 0.75 | 331.2  | 3.1  | 326.5  | 3.6  | 293.6  | 19.3 | 330.1 | 6.1 | 12.78302434 |
| 107 | Y-94 Spot 122 | 126  | 169 | 26325   | 1.3 | 17.2459 | 1.8 | 0.4118  | 2.1 | 0.0515 | 1.0 | 0.50 | 323.9  | 3.3  | 350.2  | 6.1  | 528.3  | 39.1 |       |     |             |
| 108 | Y-94 Spot 123 | 92   | 221 | 120522  | 2.4 | 18.1728 | 0.9 | 0.5228  | 1.6 | 0.0689 | 1.3 | 0.82 | 429.8  | 5.3  | 427.1  | 5.4  | 412.3  | 19.9 | 429   | 10  | 4.229003016 |
| 109 | Y-94 Spot 124 | 55   | 146 | 162047  | 2.7 | 19.1382 | 0.8 | 0.3690  | 1.4 | 0.0512 | 1.1 | 0.80 | 322.1  | 3.6  | 318.9  | 3.9  | 295.4  | 19.4 | 321.1 | 7   | 9.031547644 |
| 110 | Y-94 Spot 125 | 100  | 170 | 63882   | 1.7 | 14.3115 | 0.8 | 1.4314  | 1.5 | 0.1486 | 1.3 | 0.86 | 893.4  | 10.6 | 902.2  | 8.8  | 923.7  | 15.5 | 903   | 18  | -3.28922282 |
| 111 | Y-94 Spot 126 | 72   | 138 | 130549  | 1.9 | 18.7401 | 0.9 | 0.4140  | 1.4 | 0.0563 | 1.1 | 0.77 | 353.0  | 3.6  | 351.7  | 4.1  | 343.2  | 19.7 | 352.7 | 7.1 | 2.856616927 |
| 112 | Y-94 Spot 127 | 49   | 100 | 291635  | 2.0 | 15.2141 | 0.7 | 1.2152  | 1.2 | 0.1342 | 1.0 | 0.79 | 811.5  | 7.3  | 807.6  | 6.8  | 796.8  | 15.6 | 809   | 13  | 1.844468538 |
| 113 | Y-94 Spot 128 | 35   | 226 | 584485  | 6.4 | 5.9676  | 0.7 | 10.8330 | 1.4 | 0.4691 | 1.2 | 0.85 | 2479.4 | 23.9 | 2508.9 | 12.7 | 2532.8 | 12.2 | 2521  | 22  | -2.10649723 |
| 114 | Y-94 Spot 129 | 79   | 268 | 97174   | 3.4 | 18.6348 | 0.8 | 0.3840  | 1.3 | 0.0519 | 1.0 | 0.79 | 326.3  | 3.2  | 330.0  | 3.6  | 355.9  | 17.8 | 327.2 |     |             |

**Table S3.** Hf isotopic data for zircons from metasedimentary rocks of the Chiron Basin.

| No                                                                           | Analysis      | $(^{176}\text{Yb} + ^{176}\text{Lu}) / ^{176}\text{Hf}$ , (%) | $^{176}\text{Lu}/^{177}\text{Hf}$ | $^{176}\text{Hf}/^{177}\text{Hf}$ | $\pm 1\sigma$ , % | Age, Ma | $\epsilon_{\text{Hf}}(t)$ | $\pm$ | $t_{\text{Hf}}(\text{DM})$ , Ga | $t_{\text{Hf}}(\text{C})$ , Ga |
|------------------------------------------------------------------------------|---------------|---------------------------------------------------------------|-----------------------------------|-----------------------------------|-------------------|---------|---------------------------|-------|---------------------------------|--------------------------------|
| <b>Chiron Basin</b>                                                          |               |                                                               |                                   |                                   |                   |         |                           |       |                                 |                                |
| <i>Sample Y-99: a shale of the Aga–Borshchovochnyi metamorphic Formation</i> |               |                                                               |                                   |                                   |                   |         |                           |       |                                 |                                |
| 1                                                                            | Y-99 Spot 1   | 11.9                                                          | 0.000718                          | 0.282369                          | 0.000018          | 501.5   | -3.47                     | 0.61  | 1.24                            | 1.44                           |
| 2                                                                            | Y-99 Spot 31  | 18.7                                                          | 0.001249                          | 0.282546                          | 0.000017          | 585.1   | 4.41                      | 0.57  | 1.01                            | 1.11                           |
| 3                                                                            | Y-99 Spot 37  | 9.4                                                           | 0.000746                          | 0.282563                          | 0.000019          | 561.5   | 4.71                      | 0.65  | 0.97                            | 1.07                           |
| 4                                                                            | Y-99 Spot 43  | 8.4                                                           | 0.000573                          | 0.282402                          | 0.000018          | 580.5   | -0.50                     | 0.61  | 1.19                            | 1.35                           |
| 5                                                                            | Y-99 Spot 44  | 10.3                                                          | 0.000613                          | 0.282315                          | 0.000014          | 510.1   | -5.16                     | 0.47  | 1.31                            | 1.53                           |
| 6                                                                            | Y-99 Spot 45  | 14.5                                                          | 0.001004                          | 0.281150                          | 0.000022          | 2515.8  | -2.62                     | 0.74  | 2.93                            | 2.98                           |
| 7                                                                            | Y-99 Spot 50  | 74.7                                                          | 0.003622                          | 0.282585                          | 0.000020          | 516.7   | 3.54                      | 0.69  | 1.01                            | 1.10                           |
| 8                                                                            | Y-99 Spot 74  | 12.4                                                          | 0.000916                          | 0.282517                          | 0.000019          | 495     | 1.60                      | 0.68  | 1.04                            | 1.18                           |
| 9                                                                            | Y-99 Spot 75  | 20.8                                                          | 0.001266                          | 0.282323                          | 0.000022          | 611.6   | -2.91                     | 0.76  | 1.32                            | 1.50                           |
| 10                                                                           | Y-99 Spot 81  | 17.0                                                          | 0.001041                          | 0.282424                          | 0.000018          | 518.8   | -1.24                     | 0.64  | 1.17                            | 1.34                           |
| 11                                                                           | Y-99 Spot 84  | 22.6                                                          | 0.001530                          | 0.282482                          | 0.000017          | 837.5   | 7.42                      | 0.59  | 1.10                            | 1.15                           |
| 12                                                                           | Y-99 Spot 95  | 8.4                                                           | 0.000702                          | 0.282460                          | 0.000019          | 582.4   | 1.52                      | 0.66  | 1.11                            | 1.25                           |
| 13                                                                           | Y-99 Spot 105 | 14.3                                                          | 0.000860                          | 0.282596                          | 0.000015          | 574.3   | 6.12                      | 0.54  | 0.92                            | 1.01                           |
| 14                                                                           | Y-99 Spot 107 | 9.1                                                           | 0.000580                          | 0.282359                          | 0.000017          | 520.4   | -3.36                     | 0.59  | 1.25                            | 1.45                           |
| 15                                                                           | Y-99 Spot 111 | 9.6                                                           | 0.000749                          | 0.282465                          | 0.000018          | 586.7   | 1.78                      | 0.64  | 1.11                            | 1.24                           |
| 16                                                                           | Y-99 Spot 117 | 17.8                                                          | 0.001181                          | 0.282393                          | 0.000021          | 590.9   | -0.84                     | 0.74  | 1.22                            | 1.38                           |
| 17                                                                           | Y-99 Spot 120 | 0.4                                                           | 0.000021                          | 0.282391                          | 0.000018          | 804.8   | 4.30                      | 0.61  | 1.19                            | 1.29                           |
| <i>Sample Y-98: a sandstone of the Khara–Shibir Formation</i>                |               |                                                               |                                   |                                   |                   |         |                           |       |                                 |                                |
| 1                                                                            | Y-98 Spot 2   | 12.8                                                          | 0.000830                          | 0.282380                          | 0.000016          | 348.6   | -6.39                     | 0.54  | 1.23                            | 1.47                           |
| 2                                                                            | Y-98 Spot 5   | 15.3                                                          | 0.000968                          | 0.282314                          | 0.000021          | 350.5   | -8.70                     | 0.75  | 1.32                            | 1.59                           |
| 3                                                                            | Y-98 Spot 12  | 14.0                                                          | 0.000948                          | 0.282173                          | 0.000015          | 378.1   | -13.10                    | 0.54  | 1.52                            | 1.83                           |
| 4                                                                            | Y-98 Spot 19  | 11.4                                                          | 0.000681                          | 0.282547                          | 0.000021          | 349.1   | -0.44                     | 0.74  | 0.99                            | 1.17                           |
| 5                                                                            | Y-98 Spot 38  | 21.6                                                          | 0.001319                          | 0.282571                          | 0.000015          | 371.7   | 0.76                      | 0.52  | 0.97                            | 1.13                           |
| 6                                                                            | Y-98 Spot 41  | 20.7                                                          | 0.001401                          | 0.282615                          | 0.000018          | 347.8   | 1.79                      | 0.62  | 0.91                            | 1.05                           |
| 7                                                                            | Y-98 Spot 43  | 10.4                                                          | 0.000718                          | 0.281943                          | 0.000014          | 331     | -22.19                    | 0.49  | 1.83                            | 2.25                           |
| 8                                                                            | Y-98 Spot 59  | 23.0                                                          | 0.001385                          | 0.282345                          | 0.000017          | 389.9   | -6.87                     | 0.60  | 1.29                            | 1.53                           |
| 9                                                                            | Y-98 Spot 61  | 18.3                                                          | 0.001235                          | 0.282608                          | 0.000017          | 356.6   | 1.76                      | 0.60  | 0.92                            | 1.06                           |
| 10                                                                           | Y-98 Spot 63  | 11.8                                                          | 0.000729                          | 0.282607                          | 0.000015          | 345.7   | 1.62                      | 0.51  | 0.91                            | 1.06                           |
| 11                                                                           | Y-98 Spot 68  | 16.5                                                          | 0.001087                          | 0.282504                          | 0.000013          | 381     | -1.36                     | 0.46  | 1.06                            | 1.24                           |
| 12                                                                           | Y-98 Spot 69  | 6.6                                                           | 0.000403                          | 0.282368                          | 0.000019          | 351.9   | -6.64                     | 0.65  | 1.23                            | 1.49                           |
| 13                                                                           | Y-98 Spot 73  | 17.4                                                          | 0.001169                          | 0.282340                          | 0.000018          | 350.6   | -7.83                     | 0.63  | 1.29                            | 1.55                           |
| 14                                                                           | Y-98 Spot 81  | 9.2                                                           | 0.000572                          | 0.282632                          | 0.000017          | 353.1   | 2.70                      | 0.58  | 0.87                            | 1.01                           |
| 15                                                                           | Y-98 Spot 94  | 16.0                                                          | 0.001076                          | 0.282594                          | 0.000014          | 347.2   | 1.10                      | 0.50  | 0.93                            | 1.09                           |
| 16                                                                           | Y-98 Spot 99  | 26.3                                                          | 0.001709                          | 0.282693                          | 0.000019          | 355.9   | 4.64                      | 0.65  | 0.81                            | 0.92                           |
| 17                                                                           | Y-98 Spot 106 | 18.3                                                          | 0.001216                          | 0.282579                          | 0.000015          | 359.1   | 0.79                      | 0.53  | 0.96                            | 1.11                           |
| 18                                                                           | Y-98 Spot 111 | 16.9                                                          | 0.001075                          | 0.282297                          | 0.000015          | 385     | -8.61                     | 0.51  | 1.35                            | 1.61                           |

|                                                              |               |      |          |          |          |        |        |      |      |      |
|--------------------------------------------------------------|---------------|------|----------|----------|----------|--------|--------|------|------|------|
| 19                                                           | Y-98 Spot 116 | 22.9 | 0.001460 | 0.282559 | 0.000017 | 361    | 0.05   | 0.59 | 0.99 | 1.15 |
| 20                                                           | Y-98 Spot 130 | 10.9 | 0.000635 | 0.282452 | 0.000020 | 340.1  | -3.98  | 0.70 | 1.12 | 1.34 |
| <i>Sample Y-97: a sandstone of the Shazagaitui Formation</i> |               |      |          |          |          |        |        |      |      |      |
| 1                                                            | Y-97 Spot 3   | 17.4 | 0.001142 | 0.282488 | 0.000017 | 342.2  | -2.79  | 0.59 | 1.08 | 1.28 |
| 2                                                            | Y-97 Spot 11  | 8.2  | 0.000515 | 0.281433 | 0.000023 | 1867.8 | -6.35  | 0.78 | 2.51 | 2.66 |
| 3                                                            | Y-97 Spot 16  | 32.8 | 0.001978 | 0.282648 | 0.000024 | 342.2  | 2.71   | 0.85 | 0.88 | 1.00 |
| 4                                                            | Y-97 Spot 18  | 6.2  | 0.000398 | 0.281394 | 0.000018 | 2038   | -3.74  | 0.58 | 2.55 | 2.66 |
| 5                                                            | Y-97 Spot 42  | 6.1  | 0.000350 | 0.281374 | 0.000015 | 1912.1 | -7.25  | 0.50 | 2.58 | 2.74 |
| 6                                                            | Y-97 Spot 43  | 15.7 | 0.001008 | 0.282463 | 0.000020 | 875.5  | 7.85   | 0.67 | 1.12 | 1.16 |
| 7                                                            | Y-97 Spot 60  | 9.6  | 0.000637 | 0.282688 | 0.000018 | 328.5  | 4.11   | 0.65 | 0.79 | 0.92 |
| 8                                                            | Y-97 Spot 61  | 9.9  | 0.000689 | 0.281352 | 0.000019 | 1844.8 | -9.96  | 0.63 | 2.63 | 2.82 |
| 9                                                            | Y-97 Spot 67  | 28.8 | 0.001896 | 0.282187 | 0.000016 | 381.2  | -12.81 | 0.55 | 1.54 | 1.82 |
| 10                                                           | Y-97 Spot 85  | 12.9 | 0.000928 | 0.282146 | 0.000021 | 390.8  | -13.78 | 0.74 | 1.55 | 1.88 |
| 11                                                           | Y-97 Spot 90  | 73.9 | 0.004066 | 0.282395 | 0.000028 | 376.4  | -6.06  | 0.98 | 1.32 | 1.48 |
| 12                                                           | Y-97 Spot 109 | 11.3 | 0.000701 | 0.281446 | 0.000016 | 2015.4 | -2.84  | 0.53 | 2.50 | 2.60 |
| 13                                                           | Y-97 Spot 113 | 12.2 | 0.000731 | 0.281501 | 0.000016 | 1889.9 | -3.73  | 0.53 | 2.43 | 2.55 |
| 14                                                           | Y-97 Spot 114 | 44.9 | 0.002517 | 0.282187 | 0.000019 | 370.8  | -13.15 | 0.66 | 1.56 | 1.83 |
| 15                                                           | Y-97 Spot 115 | 18.0 | 0.001110 | 0.281171 | 0.000023 | 2486.3 | -2.73  | 0.76 | 2.91 | 2.97 |
| 16                                                           | Y-97 Spot 116 | 7.1  | 0.000431 | 0.281673 | 0.000024 | 1936.9 | 3.81   | 0.80 | 2.18 | 2.21 |
| 17                                                           | Y-97 Spot 120 | 37.9 | 0.002223 | 0.282255 | 0.000029 | 368.7  | -10.73 | 1.02 | 1.45 | 1.71 |
| 18                                                           | Y-97 Spot 121 | 11.9 | 0.000766 | 0.282180 | 0.000021 | 349.7  | -13.45 | 0.74 | 1.50 | 1.83 |
| 19                                                           | Y-97 Spot 122 | 10.7 | 0.000672 | 0.282438 | 0.000019 | 879.5  | 7.25   | 0.64 | 1.14 | 1.20 |
| <i>Sample Y-94: a sandstone of the Zhipkhoshi Formation</i>  |               |      |          |          |          |        |        |      |      |      |
| 1                                                            | Y-94 Spot 1   | 40.3 | 0.002759 | 0.282453 | 0.000041 | 404.1  | -3.12  | 1.43 | 1.18 | 1.35 |
| 2                                                            | Y-94 Spot 3   | 26.5 | 0.001781 | 0.282947 | 0.000030 | 351.1  | 13.52  | 1.06 | 0.44 | 0.46 |
| 3                                                            | Y-94 Spot 33  | 28.2 | 0.001651 | 0.281979 | 0.000017 | 341.4  | -20.91 | 0.61 | 1.82 | 2.19 |
| 4                                                            | Y-94 Spot 34  | 13.1 | 0.000890 | 0.283000 | 0.000023 | 325.5  | 15.04  | 0.80 | 0.36 | 0.36 |
| 5                                                            | Y-94 Spot 38  | 13.3 | 0.001027 | 0.282714 | 0.000021 | 318.1  | 4.73   | 0.75 | 0.76 | 0.88 |
| 6                                                            | Y-94 Spot 48  | 10.9 | 0.000813 | 0.282613 | 0.000022 | 506.9  | 5.27   | 0.76 | 0.90 | 1.00 |
| 7                                                            | Y-94 Spot 53  | 12.4 | 0.001090 | 0.282674 | 0.000026 | 313.9  | 3.21   | 0.90 | 0.82 | 0.96 |
| 8                                                            | Y-94 Spot 64  | 32.7 | 0.002257 | 0.281642 | 0.000020 | 1870.9 | -1.06  | 0.67 | 2.33 | 2.40 |
| 9                                                            | Y-94 Spot 69  | 15.6 | 0.001144 | 0.282734 | 0.000028 | 342.3  | 5.93   | 0.99 | 0.74 | 0.84 |
| 10                                                           | Y-94 Spot 95  | 11.4 | 0.000844 | 0.281621 | 0.000023 | 1845.1 | -0.59  | 0.76 | 2.27 | 2.35 |
| 11                                                           | Y-94 Spot 99  | 10.3 | 0.000769 | 0.282510 | 0.000022 | 323.3  | -2.34  | 0.78 | 1.04 | 1.25 |
| 12                                                           | Y-94 Spot 108 | 33.2 | 0.001919 | 0.282334 | 0.000030 | 372.4  | -7.77  | 1.07 | 1.33 | 1.56 |
| 13                                                           | Y-94 Spot 112 | 24.7 | 0.001825 | 0.282683 | 0.000030 | 467.3  | 6.58   | 1.03 | 0.82 | 0.90 |
| 14                                                           | Y-94 Spot 118 | 13.1 | 0.000837 | 0.282591 | 0.000015 | 347.3  | 1.06   | 0.53 | 0.93 | 1.09 |
| 15                                                           | Y-94 Spot 127 | 32.1 | 0.002349 | 0.282298 | 0.000019 | 811.5  | -0.09  | 0.67 | 1.40 | 1.52 |



## References

1. McDonough, W.F., Sun, S.S. The Composition of The Earth. *Chem. Geol.* **1995**, *120*, 223–253.
2. Nesbitt, H.W., Young, G.M. Early Proterozoic Climates and Plate Motions Inferred from Major Element Chemistry of Lutites. *Nature*. **1982**, *299*, 715–717, doi:10.1038/299715a0.
3. Visser, J.N.J., Young, G.M. Major Element Geochemistry and Paleoclimatology of the Permo-Carboniferous Glaciogene Dwyka Formation and Post-Glacial Mudrocks in Southern Africa. *Palaeogeography, Palaeoclimatology, Palaeoecology*. **1990**, *81*, 49–57.
4. Harnois, L. The CIW Index: a New Chemical Index of Weathering. *Sediment. Geol.* **1988**, *55*, 319–322, doi:10.1016/0037-0738(88)90137-6.
5. Parker, A. An Index of Weathering for Silicate Rocks. *Geol. Magazine*. **1970**, *107*, 501–504, doi:10.1017/S0016756800058581.
6. Jayawardena, U.S., Izawa, E. A New Chemical Index of Weathering For Metamorphic Silicate Rocks in Tropical Regions: a Study from Sri Lanka. *Engineering Geol.* **1994**, *36*, 303–310, doi:10.1016/0013-7952(94)90011-6.
7. Ludwig, K.R. *User's Manual for a Geochronological Toolkit for Microsoft Excel*. Berkeley Geochronology Center Special Publication, Berkeley, CA, USA, 2008; pp. 1–75.

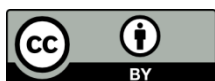

© 2020 by the authors. Submitted for possible open access publication under the terms and conditions of the Creative Commons Attribution (CC BY) license (<http://creativecommons.org/licenses/by/4.0/>).
